# Supplementary material for: Microbe-host interplay in atopic dermatitis and psoriasis
Source: PubMed Central journal article supplement (PMC6795799; doi:10.1038/s41467-019-12253-y), 2019-10-16
Supplement: 41467_2019_12253_MOESM2_ESM.pdf [file 41467_2019_12253_MOESM2_ESM.pdf]

Reviewers' comments:

Reviewer #1 (Remarks to the Author):

Fyhrquist et al. perform a matched 16S rRNA and host transcriptome profiling on AD, psoriasis, and healthy controls at two different skin sites of disease occurrence. Major findings cited confirmed previous reports that *Staphylococcus aureus* is significantly associated with AD (Kong et al) with depletion of anaerobes (Myles et al), and that a strong microbial signature is lacking in psoriasis. Reassuringly, the transcriptional data is largely consistent with previous reports of AD or psoriasis transcriptomes, and the authors found that the host transcriptome was a stronger predictor of skin disease severity than different microbiome metrics.

We commend the authors on the size of the cohort, the care taken with negative controls and confounders, and a clear and well-presented paper. However, the study itself represents a relatively modest advance for the field, with the major contribution being a correlation analysis with microbial features with host skin transcriptome data. The size of the cohort is an asset and allows the author to break down the AD patients into yes/no *S. aureus* groups which allows them to further refine transcriptome correlates. Like these previous studies, different classifier methods were used to define host or microbial features characteristic of the disease, with the major advantage again being the size of the study.

A major point of revision would be to include additional covariate analysis for different skin treatments that the patients had undergone prior to the washout period with Dove, and to describe with more detail the different features of the matched healthy controls. This is because the authors observed that there were likely different community states/microbiome 'types' for AD because some individuals were characterized by a prevalence of *S. aureus* while others not. Kong et al. reported that intermittent treatment shifts the microbiome towards one with significantly less *S. aureus*, and it is likely that this could be one of the factors that could explain the variation.

Also, why were OTUs clustered at the 99.3% identity level? Which is fairly atypical and naturally resulted in a very large number of OTUs. There should be some justification of this in the methods, and/or also performed at more conventional levels (e.g., 97%).

Reviewer #2 (Remarks to the Author):

In the paper by Fyhrquist et al., “Microbe-host interplay in atopic dermatitis and psoriasis”, the authors assemble a large cohort of cases and controls (over 300 individuals), for which they perform 16S rRNA sequencing and microarray-based analysis of transcriptomes. They find that AD is dominated by *S. aureus* and immune activation, whereas PSO was associated with assemblages of organisms.

I was able to review the technicality of the manuscript as my expertise is in microbial community analysis and gut microbiomes, though I was able to only touch upon the conclusions regarding changes in the immune system pertaining to skin disease and the originality of the work from someone in the microbiome field, but an outsider to these specific areas.

My biggest issue with the manuscript is that it overall lacked details about the study design, sample collection and most importantly, statistical analyses, which made it both hard to review and also gave the impression that many of these choices were made without sufficient consideration. These include the method of DNA extraction (crucial for comparing across studies), the methods for performing skin swabs (Fig. S1 implies some buffer but none was discussed), whether there were any exclusion criteria, how samples were matched, and what affymetrix plates were used for transcriptomics, to name a few. In terms of statistical analysis, it was unclear why some choices were made—99.3% identity for clustering, how controlling for confounders was done, but also what tests were used (see Figure 1A, a p-value is reported with a vague descriptor of ‘nonparametric score’, but the text only says ‘significantly associated’, yet this repeats in multiple results of the paper, and this is unclear whether this is significantly associated with one of the conditions or if multiple are being compared etc.). Similarly, in the transcriptomics section, the only thing that was mentioned was “Differential gene expression analysis” (line 347) rather than the specific method used. There wasn’t mention about false-discovery corrections for some analyses, though mentioned for others (i.e. Fig 4), or whether any normalization was performed on gene abundances. Since the devil is in the details for microbiome analyses, this can potentially be a major issue.

My other issue with the manuscript is the novelty of the results. Despite my disclaimer that I don’t work entirely in this field, it seems obvious both from quick lit searches and their own statements that there have been a number of studies that have done community analysis of psoriasis and AD and their analysis doesn’t particularly add much. The *S. aureus*-association with AD is not a new finding, and this has been reported on many times. There have also been RNA-seq experiments performed on both AD (Suarez-Farinas et al, 2015 and even a metaanalysis of transcriptome analyses (Ding et al., 2015) and PSO (Li et al., 2014). They find many of the same co-occurrences and pathway regulation, even according to their own statements (lines 552, 574). It was hard to decipher whether direct comparison could be made between the two disease cohorts because of the ambiguity of the matching scheme, and also the difference in body sampling sites. I can’t comment whether their results significantly improve or change our understand of PSO or AD.

Other issues:

- It was not clear how samples were matched, especially since large differences in gender underlie the Psoriasis and HV cohorts. Similarly, age-related dysbioses have been reported for skin microbiomes which are thought to predispose individuals to AD. This wasn't tested (or mentioned) within this cohort.
- Were there any exclusion criteria? Atopic dermatitis and psoriasis can be treated in many ways, including topical medications (including corticosteroids), oral immunosuppressant therapies, antibiotics, vitamin therapies, and oral steroids as well as immunomodulators. These were never mentioned in the patient recruitment or analysis.

Minor issues:

- Hard to follow what is being plotted in many of the figures. I mentioned Fig. 1A above, but this is the same for Fig 1B. Is this some aggregate of all of the samples, masking inter-personal variability? This is abnormal to group individual compositions into one composite composition.
- The data display was very confusing—like Figure 3B is very confusing—are these genes up or down in these different conditions and the same direction in these different conditions. This was a confusing figure. Figure 3C/D are also confusing visually. Or what are the yellow edges in Fig 4F?

Reviewer #3 (Remarks to the Author):

In this manuscript, the authors conducted 16s rRNA sequencing identification of the skin microbiome of patients with atopic dermatitis and psoriasis as well as host transcriptome characterization using microarrays of skin biopsies at the same sites. They showed that *S. aureus* is significantly associated with atopic dermatitis and that multiple species, such as *Corynebacterium* spp and anaerobes are associated with psoriatic skin. They also made classifiers to identify the microbial species that could most differentiate between atopic dermatitis vs normal and psoriasis vs normal skin. They then analyze the host skin transcriptome at these sites.

Many of the findings in this paper confirm previously known studies. The skin microbiome findings for atopic dermatitis reflect what is already known in the literature<sup>1,2</sup>. Some findings for the psoriatic skin microbiome are also already known, such as the overrepresentation of *Streptococcus* spp and overabundance of *Corynebacterium* species (reviewed in 3) although this study has a

different way of presenting the data (Figures 1-2). The approach of defining microbial classifiers of AD and psoriatic skin is novel, but without any mechanistic data to suggest why particular species in the classifier are disease-defining, the finding has less impact. Additionally, even if species within the classifier are not disease-defining but are in fact secondary effects of a particular type of inflammation, without mechanistic data suggesting why AD vs psoriatic inflammation might bias towards one set of bacteria vs another, it is hard to assess the biological significance of the classifier.

The atopic dermatitis transcriptomic data reveal similar pathways as previous skin transcriptome studies<sup>4,5</sup> and confirms known involved pathways, such as Th1 and Th2 pathways (Figure 3). The psoriasis transcriptomic data also confirm known involved pathways and prior studies (reviewed in 6,7), such as IL-17 signaling and IFN- $\gamma$  signaling (Figure 3). Although Figures 3-4 were clear and beautiful representations of the data, they did not offer new hypothesis-generating insight into disease pathogenesis.

The main novelty of this study is that skin microbiome and transcriptome data were collected at the same time, to allow for analysis of microbiome-transcriptome correlations. However, in their analysis, the authors did not reveal surprising information. By comparing the transcriptomes in AD samples with high abundance of *S. aureus* to those with low abundance of *S. aureus*, the authors found an enrichment of pathways such as "Keratinization" and enrichment in gene expression of IL18, IL1a, TNF, IFN $\gamma$ , and other expected pro-inflammatory cytokines (Figure 4C-D).

The analysis of psoriatic microbiomes to transcriptomes revealed that *Corynebacterium* spp may be negatively associated with inflammatory pathways in psoriasis (p.17, line 441-461). However, there are no mechanistic studies to suggest that *Corynebacterium* is protective. Additionally, earlier in the microbiome study, *Corynebacterium* was shown to be overrepresented in psoriatic lesions, which seems contradictory. Perhaps, some *Corynebacterium* species are immunoregulatory or help resistance towards more inflammatory bacteria and are therefore protective, whereas other *Corynebacterium* species are positive associated with psoriasis because they are more pro-inflammatory. This idea would be interesting, but would need additional studies in order to be validated.

There is another finding in the paper that I thought was interesting: abundance of anaerobic bacteria in AD was decreased suggesting that there is increased O<sub>2</sub> tension in AD lesions (Figure 1D, discussed in line 555-557). An analysis of metabolic pathways upregulated in disease states was a very successful approach to show that utilization of formate and aerobic respiration by *E. coli* was increased in gut inflammation<sup>(8)</sup> and then that blocking this particular microbial metabolic pathway using tungsten could ameliorate colitis<sup>(9)</sup>. Therefore, if the authors were to use metagenomic sequencing instead of 16s rRNA sequencing to look at the microbial metabolic pathways that were changed in disease states and correlate this to host transcriptome signatures, this study would be much more informative and more likely to generate hypotheses for further mechanistic studies.



The approach and intent of the study was commendable and as a field, we do need to move toward connecting microbiota changes to host epithelial or immunologic changes. However, the data presented here did not reveal many distinctive positive results. If the authors were to re-focus on some of the more interesting findings highlighted above and develop further mechanistic insight instead of presenting a broad overview of findings without specific hypotheses, this would greatly improve the impact of this study.

#### References:

1. Byrd, A. L. et al. *Staphylococcus aureus* and *Staphylococcus epidermidis* strain diversity underlying pediatric atopic dermatitis. *Sci. Transl. Med.* 9, eaal4651 (2017).
2. Kong, H. H. et al. Temporal shifts in the skin microbiome associated with disease flares and treatment in children with atopic dermatitis. *Genome Res.* 22, 850–859 (2012).
3. Yan, D. et al. The Role of the Skin and Gut Microbiome in Psoriatic Disease. *Curr. Dermatol. Rep.* 6, 94–103 (2017).
4. Ghosh, D. et al. Multiple Transcriptome Data Analysis Reveals Biologically Relevant Atopic Dermatitis Signature Genes and Pathways. *PLOS ONE* 10, e0144316 (2015).
5. Ewald, D. A. et al. Meta-analysis derived atopic dermatitis (MADAD) transcriptome defines a robust AD signature highlighting the involvement of atherosclerosis and lipid metabolism pathways. *BMC Med. Genomics* 8, (2015).
6. Jiang, S., Hinchliffe, T. E. & Wu, T. Biomarkers of An Autoimmune Skin Disease—Psoriasis. *Genomics Proteomics Bioinformatics* 13, 224–233 (2015).
7. Lowes, M. A., Suárez-Fariñas, M. & Krueger, J. G. Immunology of Psoriasis. *Annu. Rev. Immunol.* 32, 227–255 (2014).
8. Hughes, E. R. et al. Microbial Respiration and Formate Oxidation as Metabolic Signatures of Inflammation-Associated Dysbiosis. *Cell Host Microbe* 21, 208–219 (2017).
9. Zhu, W. et al. Precision editing of the gut microbiota ameliorates colitis. *Nature* 553, 208–211 (2018).

**Reviewer #1** (Remarks to the Author):

**Comment 1:** *Fyhrquist et al. perform a matched 16S rRNA and host transcriptome profiling on AD, psoriasis, and healthy controls at two different skin sites of disease occurrence. Major findings cited confirmed previous reports that Staphylococcus aureus is significantly associated with AD (Kong et al) with depletion of anaerobes (Myles et al), and that a strong microbial signature is lacking in psoriasis. Reassuringly, the transcriptional data is largely consistent with previous reports of AD or psoriasis transcriptomes, and the authors found that the host transcriptome was a stronger predictor of skin disease severity than different microbiome metrics. We commend the authors on the size of the cohort, the care taken with negative controls and confounders, and a clear and well-presented paper. However, the study itself represents a relatively modest advance for the field, with the major contribution being a correlation analysis with microbial features with host skin transcriptome data. The size of the cohort is an asset and allows the author to break down the AD patients into yes/no S. aureus groups which allows them to further refine transcriptome correlates. Like these previous studies, different classifier methods were used to define host or microbial features characteristic of the disease, with the major advantage again being the size of the study.*

**ANSWER:** Thank you for reviewing our manuscript and for raising this comment. We would like to point out that next to its size a main novelty of this study is that the cutaneous microbiome and the host's transcriptome data were collected at the same location and time, to allow for analysis of microbe-host-interactions (microbiome-transcriptome correlations). The approach and intent of the study is commendable and as a field, we do need to move towards connecting changes in microbiota to host epithelial or immunologic homeostasis and disease.

We have now revised the manuscript and added/ included:

1. Preliminary data from whole genome sequencing (WGS), to validate 16S based OTU classification and functional predictions based on the 16S marker. The results show close agreement between the two sequencing methods (Fig. 1) and are now included in the manuscript in Fig.S9 and in the text on p.17.

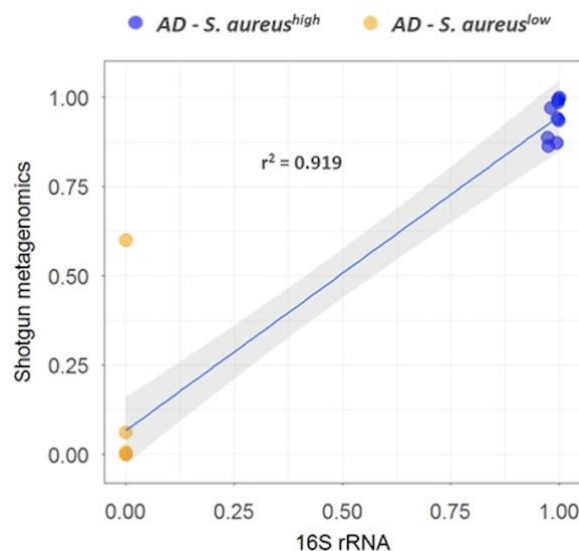

**Fig. 1. Validation of 16S-based OTU classification by WGS.** Correlation of relative abundance of *S. aureus* between 16S rRNA sequencing and WGS metagenomics. For validation of 16S OTU classification, preliminary data of WGS metagenomic sequencing of 20 randomly selected samples from 10 *S. aureus* 'high' and 10 *S. aureus* 'low' patients were used. The significant correlation ( $r^2=0.919$ ) shows agreement of taxonomic classification between the independent sequencing methods.

- Mechanistic validation of the observed host-microbe-interactions, including exposure of human 3D epidermal equivalents with viable *S. aureus*, showing the induction of key *S. aureus* signature genes (Fig. 2). The results are now included in the manuscript in Fig S10 and in the text on p. 17.

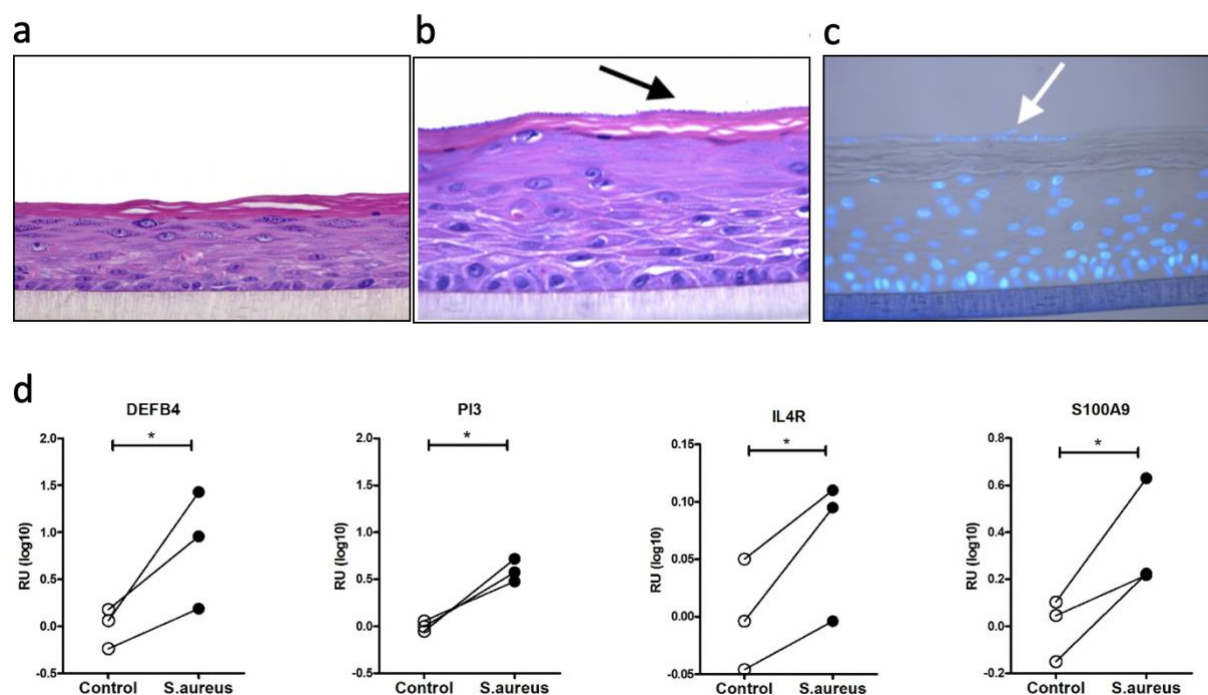

**Fig. 2. Mechanistic validation of host-microbe interactions.** **a** Morphological analysis of human epidermal equivalents (HEEs). **b** H&E and **c** immuno-fluorescence staining of microbial colonization of HEEs cultured for 8 days at the air-liquid interface. *S. aureus* bacteria were exposed to the skin equivalent. Arrows indicate visible bacteria on top of the stratum corneum. **d** Keratinocyte response following bacterial stimulation, qPCR measurement of selected *S. aureus* signature genes.

- In depth analysis of tryptophan (trp) metabolism, where we observed significant upregulation of the kynurenine pathway in the *S. aureus* ‘high’ cohort, and reconstructed trp breakdown in atopic skin inflammation (Fig. 3a), indicating the accumulation of the metabolite 3-hydroxyanthranilic acid (3-HAA), which is considered an inflammatory mediator. Moreover, the depletion of the essential amino acid, trp, may be a mode of host defense during bacterial colonization. Since certain microbes, including staphylococci, are susceptible to the depletion of trp by the host, we investigated whether such mechanisms are at play in AD, during *S. aureus* overcolonization. First we cultured *S. aureus* strains from the skin of an independent group of AD patients, and carried out trp-dependence screening. The results indicate that 66% of isolated *S. aureus* strains were independent of trp (Fig 3c). Second, while we did not have access to bacterial isolates from the MAARS cohort, we examined preliminary whole-genome shotgun metagenomic sequencing (WGS) data, and found that on average, 73% of samples carried members of the trp gene family (Fig. 3d). These results are now included in the manuscript as Fig. S11, and in the text on p.17-18 and discussed on p. 24-25.

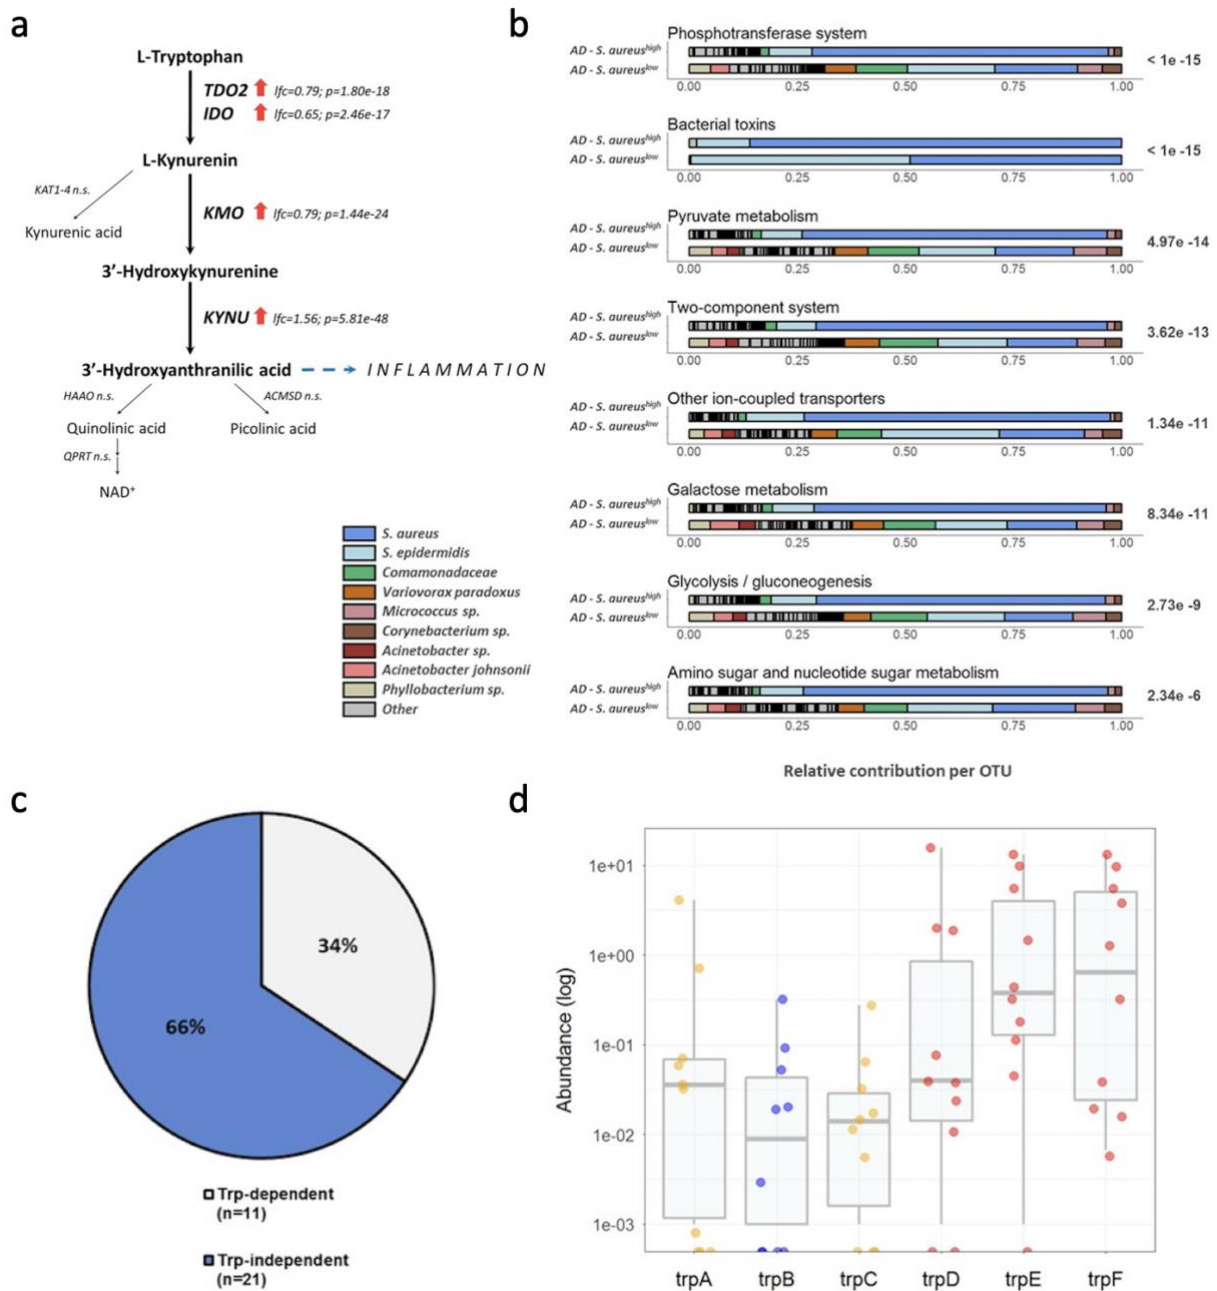

**Fig. 3. Inference of functional metagenomic features based on 16S rRNA and whole genome sequencing.** **a** Regulation of the kynureninase pathway of tryptophan degradation on the mRNA level between HV and the *S. aureus* 'high' cohort. Red arrows: significantly regulated genes, n.s.: not significant. Arrow and font thickness correspond to significance. **b** Contribution of individual OTUs to relevant microbial pathways. The gene content of individual OTUs was inferred using the Greengenes v.13.5 database, and subsequently used to predict enriched microbial pathways in the respective disease groups. Horizontal bars represent the percentage of genes contributed by the most abundant microbes in the dataset. X-axis: sum of relative contributions per sample. Y-axis: contribution across *S. aureus* 'high' and *S. aureus* 'low' cohorts, respectively. **c** Culture-based tryptophan dependence assay of 32 *S. aureus* strains isolated from moderate-to-severe atopic dermatitis patients. Overall, 66% of colonizing *S. aureus* strains were shown to grow independent of tryptophan in Trp-depleted culture medium. **d** Presence of tryptophan biosynthesis-related gene families in WGS sequencing results of *S. aureus* 'high' samples. Y axis: relative abundance of UniRef50-defined *trp* gene families.

4. In order to investigate whether sensitivity to tryptophan depletion is at play in AD during *S. aureus* overcolonization, we sought to identify differences in the metabolic capacity of the microbiome, and generated 16S rRNA-based prediction of the metagenome using the PICRUSt tool (Langille et al., 2013). As a result, we found significantly overrepresented

microbial functions in *S. aureus* ‘high’ compared to ‘low’ groups, such as: ‘bacterial toxins’ (ko02042), ‘phosphotransferase system’ (ko02060), ‘two-component system’ (ko02022), among others (Fig3b, Fig.S11b in the manuscript, Fig.4a). It is notable that due to the great difference in beta diversity, the *S. aureus* ‘high’ cohort represents the bacterial functions of mainly a single species, *S. aureus*, with little contributions from other microbes, while this is contrasted by the functional capacity of a relatively high diversity of microbes in *S. aureus* ‘low’. These results are included in the manuscript as Fig. S11b and Fig.S14a, and in the text on p.17, and discussed on p.24.

- Furthermore, 16S rRNA-based prediction of the metagenome revealed a shift towards glycolysis in the *S. aureus* ‘high’ associated microbiome (Fig. 4a, Fig.S14a in the manuscript). *S. aureus* is known to impose metabolic stress on keratinocytes, resulting in HIF1alpha signaling in the skin, which in turn promotes the generation of inflammatory cytokines, particularly mature IL-1beta (Wickersham et al., 2017). Indeed, in the *S. aureus* ‘high’ samples HIF1a signaling was significantly induced, including HIF1A and HIF1A-dependent genes HK2 and PFKP (Figure 4b, Fig. S14b in the manuscript), and functional analysis predicted IL-1beta as a top upstream regulator, based on the gene expression profiles in the skin (Figure 4d). The results support the notion that metabolic stress, caused by microbial overcolonization as the microorganisms and skin compete for limited oxygen and glucose, drives inflammatory signaling through the induction of HIF1A. These results are included in the manuscript in Fig 14S, and in the text on p. 17 and p. 24-25.

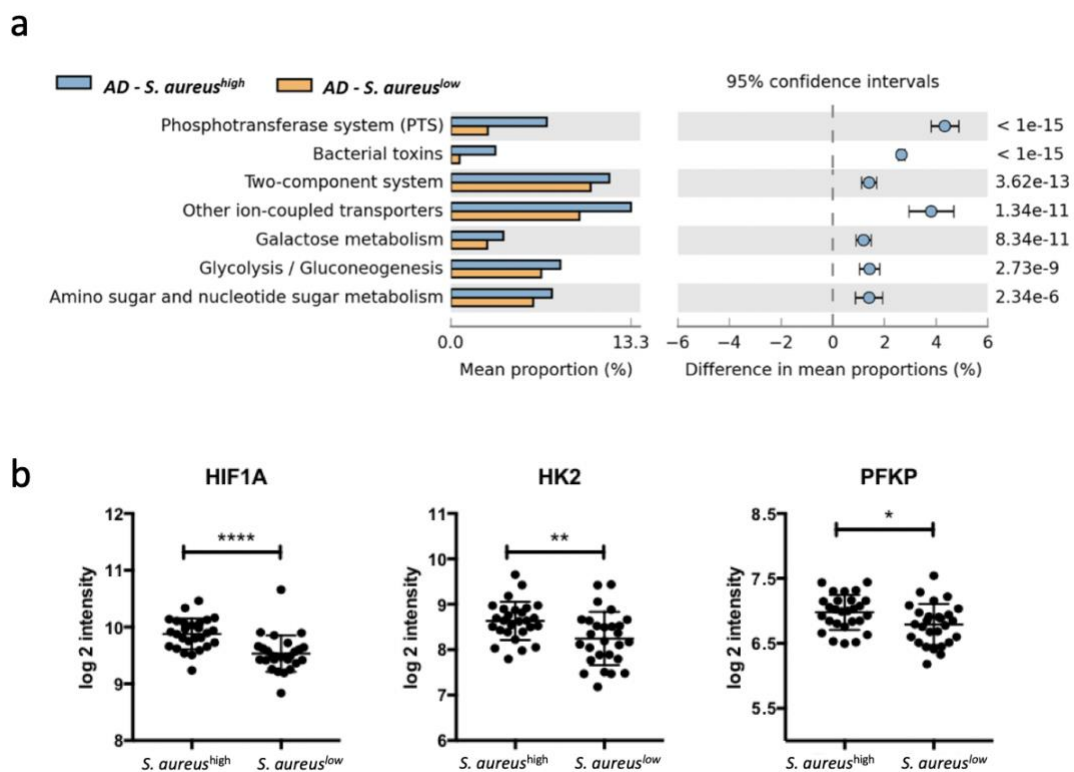

**Fig. 4. Prediction of the *S. aureus* metagenome and gene expression in the skin.** **a** Significantly enriched microbial pathways between *S. aureus* ‘high’ and *S. aureus* ‘low’ groups. Gene content of individual OTUs was inferred using the Greengenes v.13.5 database, and subsequently used to predict enriched microbial pathways in the respective disease groups. **b** Expression of HIF1A and HIF1A dependent genes in the skin in the *S. aureus* ‘high’ cohort.



**Comment 2:** A major point of revision would be to include additional covariate analysis for different skin treatments that the patients had undergone prior to the washout period with Dove, and to describe with more detail the different features of the matched? healthy controls. This is because the authors observed that there were likely different community states/microbiome 'types' for AD because some individuals were characterized by a prevalence of *S. aureus* while others not. Kong et al. reported that intermittent treatment shifts the microbiome towards one with significantly less *S. aureus*, and it is likely that this could be one of the factors that could explain the variation.

**ANSWER:** The patients were carefully (with strict inclusion and exclusion criteria) selected for this study, omitting those who used systemic antibiotics within 2 weeks, or systemic immunosuppressive therapy, phototherapy, or systemic biologic agents within the previous 12 weeks prior to screening.

We agree this is an important issue to explore, and suggest including it in subsequent studies/analyses of this patient cohort.

**Comment 3:** Also, why were OTUs clustered at the 99.3% identity level? Which is fairly atypical and naturally resulted in a very large number of OTUs. There should be some justification of this in the methods, and/or also performed at more conventional levels (eg. 97%).

**ANSWER:** The traditional 97% threshold proposed in 1994 is conservative and could safely be increased, without a significant risk of wrongly differentiated species. In the V4 region, which is one of the two regions (V3-V4) we use in this study, the threshold can be risen much higher, due to stable variable regions as previously described (Meier-Kolthoff JP et al Arch Microbiol. 2013, doi: 10.1007/s00203-013-0888-4).

Importantly, we have now used preliminary data from whole genome sequencing (WGS), to validate 16S based OTU classification and functional predictions based on the 16S marker. The results show close agreement between the two sequencing methods (see Figure 1 above), and are included in the manuscript on p.17 and in Fig. S9D.

## **Reviewer #2 (Remarks to the Author):**

**Comment 1:** In the paper by Fyhrquist et al., "Microbe-host interplay in atopic dermatitis and psoriasis", the authors assemble a large cohort of cases and controls (over 300 individuals), for which they perform 16S rRNA sequencing and microarray-based analysis of transcriptomes. They find that AD is dominated by *S. aureus* and immune activation, whereas PSO was associated with assemblages of organisms.

I was able to review the technicality of the manuscript as my expertise is in microbial community analysis and gut microbiomes, though I was able to only touch upon the conclusions regarding changes in the immune system pertaining to skin disease and the originality of the work from someone in the microbiome field, but an outsider to these specific areas.

My biggest issue with the manuscript is that it overall lacked details about the study design, sample collection and most importantly, statistical analyses, which made it both hard to review and also gave the impression that many of these choices were made without sufficient consideration. These include the method of DNA extraction (crucial for comparing across studies), the methods for performing skin swabs (Fig. S1 implies some buffer but none was discussed), whether there were any exclusion criteria, how samples were matched, and what Affymetrix plates were used for transcriptomics, to name a few.

**ANSWER:** This information is available in great detail in the Supplementary material p61-69.

**Comment 2:** *In terms of statistical analysis, it was unclear why some choices were made—99.3% identity for clustering, how controlling for confounders was done, but also what tests were used (see Figure 1A, a p-value is reported with a vague descriptor of ‘nonparametric score’, but the text only says ‘significantly associated’, yet this repeats in multiple results of the paper, and this is unclear whether this is significantly associated with one of the conditions or if multiple are being compared etc.).*

**ANSWER:** Concerning 99.3%, please see the answer above.

Confounders were tested and removed as described and illustrated on in the main text on p. 8, in Supplementary material on page 63, last paragraph, in Table S1, and in FigS3C. The analysis of 16S rRNA including the use of statistical tests is described in detail in Supplementary materials, p. 61-64. Differentially abundant OTUs were identified by comparing the abundance distribution of each OTU across the clinical groups (AD, PSO, HV) with the Kruskal-Wallis test (FDR, p-value<0.05). Microbe-disease specific associations were detected testing for the differences in the abundances with the Mann-Whitney U-test (FDR, p-value<0.05).

**Comment 3:** *Similarly, in the transcriptomics section, the only thing that was mentioned was “Differential gene expression analysis (line 347) rather than the specific method used. There wasn’t mention about false-discovery corrections for some analyses, though mentioned for others (i.e. Fig 4), or whether any normalization was performed on gene abundances. Since the devil is in the details for microbiome analyses, this can potentially be a major issue.*

**ANSWER:** Affymetrix microarray data were normalized and technical batch effects corrected during preprocessing of the data using state-of-the-art methods, and all critical biological variables were adjusted and tested in the final linear model. Furthermore, Benjamini & Hochberg correction for multiple testing was used throughout the microarray analysis. This information is available in great detail in the Supplementary material p. 65-66.

**Comment 4:** *My other issue with the manuscript is the novelty of the results. Despite my disclaimer that I don’t work entirely in this field, it seems obvious both from quick lit searches and their own statements that there have been a number of studies that have done community analysis of psoriasis and AD and their analysis doesn’t particularly add much. The S. aureus-association with AD is not a new finding, and this has been reported on many times. There have also been RNA-seq experiments performed on both AD (Suarez-Farinas et al, 2015 and even a metaanalysis of transcriptome analyses (Ding et al., 2015) and PSO (Li et al., 2014). They find many of the same co-occurrences and pathway regulation, even according to their own statements (lines 552, 574). It was hard to decipher whether direct comparison could be made between the two disease cohorts because of the ambiguity of the matching scheme, and also the difference in body sampling sites. I can’t comment whether their results significantly improve or change our understand of PSO or AD.*

**ANSWER:** We have now added predictions of bacterial pathways, validation of 16S based taxonomy by WGS, functional predictions and mechanistic validations of the observed host-microbe interactions. The analysis brings in several novel aspects of microbe-host-interplay. For more details, please see the answer to reviewer #1 starting on p. 2.

**Comment 5:** *Other issues:*

- *It was not clear how samples were matched, especially since large differences in gender underlie the Psoriasis and HV cohorts. Similarly, age-related dysbiosis have been reported for skin microbiomes which are thought to predispose individuals to AD. This wasn't tested (or mentioned) within this cohort.*
- *Were there any exclusion criteria? Atopic dermatitis and psoriasis can be treated in many ways, including topical medications (including corticosteroids), oral immunosuppressant therapies, antibiotics, vitamin therapies, and oral steroids as well as immunomodulators. These were never mentioned in the patient recruitment or analysis.*

**ANSWER:**

Matching of samples: As indicated in Figure S1, the mean ages in the AD, PSO and HV groups are 44.5, 48.8 and 34.9 y, respectively. Women are slightly overrepresented in HV, and men in PSO. To account for these differences, age, gender, anatomical location and clinical center were used as covariates during the extrapolation of differentially expressed genes, and OTUs were corrected for gender, age, anatomical location and clinical center (Table S1). The analysis which combined the transcriptome and the microbiome data, included only individuals which had both types of samples available – a high-quality microbiome sample, and high-quality transcriptome sample.

Exclusion criteria: The exclusion criteria included concomitant autoimmune diseases (e.g. rheumatoid arthritis, diabetes, alopecia areata, etc.) the use of systemic antibiotics within 2 weeks and systemic immunosuppressive therapy or phototherapy or systemic biologic agents within the previous 12 weeks prior to screening. Before skin sampling, the biopsy sites were left untreated for at least 2 weeks and cleansing with only the non-antibacterial Dove soap was allowed and washing was avoided for 24 hours prior to sampling. The patients or healthy volunteers who did not match these clinical exclusion criteria were removed from the study.

This information is available in Supplementary information, p.61.

*Minor issues:*

**Comment 6:** - *Hard to follow what is being plotted in many of the figures. I mentioned Fig 1A above, but this is the same for Fig 1B. Is this some aggregate of all of the samples, masking inter-personal variability? This is abnormal to group individual compositions into one composite composition.*

**ANSWER:** We generated individual compositions of the skin microbiota and included these in the supplementary information (see Fig. 5 below, included in the manuscript as Fig. S2). However, as this study includes 316 samples, we chose to show average microbial compositions of AD, PSO and HV in main Figure 1B in the manuscript.

**Comment 7:** - *The data display was very confusing—like Figure 3B is very confusing—are these genes up or down in these different conditions and the same direction in these different conditions. This was a confusing figure. Figure 3C/D are also confusing visually. Or what are the yellow edges in Fig 4F?*

**ANSWER:** The yellow hue inside the dark borders in Fig. 3C and 3D indicate significance, in -log p-values. The yellow edges without a dark border in Fig. 3D indicate log fold change (LogFC). To simplify Fig. 3, we moved panel D to supplementary materials (Figure S7), and included instead dot plots of key genes in HV, AD and PSO.



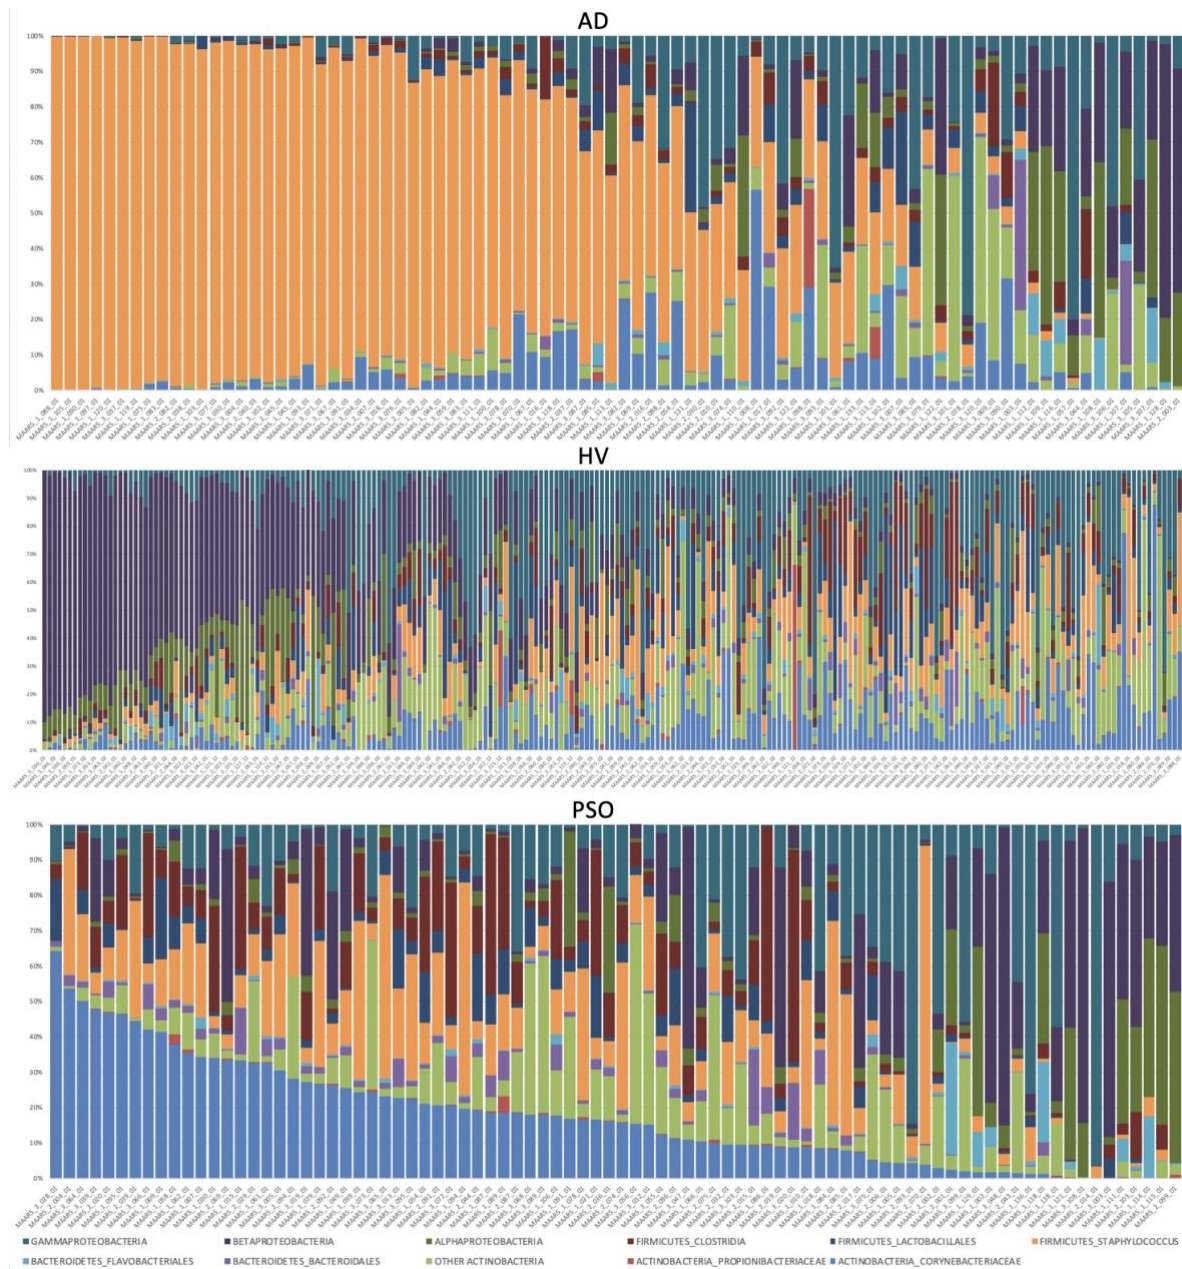

**Fig. 5.** Individual compositions of the skin microbiota in AD lesions, HV normal skin and PSO lesions. The most abundant bacterial groups depicted for HV, AD and PSO based on 16S sequences.

**Reviewer #3** (Remarks to the Author):

**Comment 1:** In this manuscript, the authors conducted 16S rRNA sequencing identification of the skin microbiome of patients with atopic dermatitis and psoriasis as well as host transcriptome characterization using microarrays of skin biopsies at the same sites. They showed that *S. aureus* is significantly associated with atopic dermatitis and that multiple species, such as *Corynebacterium* spp and anaerobes are associated with psoriatic skin. They also made classifiers to identify the microbial species that could most differentiate between atopic dermatitis vs normal and psoriasis vs normal skin. They then analyze the host skin transcriptome at these sites.

Many of the findings in this paper confirm previously known studies. The skin microbiome findings for atopic dermatitis reflect what is already known in the literature<sup>1,2</sup>. Some findings

for the psoriatic skin microbiome are also already known, such as the overrepresentation of *Streptococcus* spp and overabundance of *Corynebacterium* species (reviewed in 3) although this study has a different way of presenting the data (Figures 1-2). The approach of defining microbial classifiers of AD and psoriatic skin is novel, but without any mechanistic data to suggest why particular species in the classifier are disease-defining, the finding has less impact. Additionally, even if species within the classifier are not disease-defining but are in fact secondary effects of a particular type of inflammation, without mechanistic data suggesting why AD vs psoriatic inflammation might bias towards one set of bacteria vs another, it is hard to assess the biological significance of the classifier.

**ANSWER:** The reviewer raised an important question which unfortunately cannot be addressed here, as it would require a whole new study on its own. However, we believe that our by far largest patient material ever reported in the context of the integration of skin microbiome with the host's cutaneous transcriptome - obtained simultaneously from the same individuals and from the same anatomical locations - provides novel information regarding how microbial communities in the skin are involved in the regulation of skin inflammation in AD and PSO.

**Comment 2:** *The atopic dermatitis transcriptomic data reveal similar pathways as previous skin transcriptome studies<sup>4,5</sup> and confirms known involved pathways, such as Th1 and Th2 pathways (Figure 3). The psoriasis transcriptomic data also confirm known involved pathways and prior studies (reviewed in 6,7), such as IL-17 signaling and IFN-g signaling (Figure 3). Although Figures 3-4 were clear and beautiful representations of the data, they did not offer new hypothesis-generating insight into disease pathogenesis.*

**ANSWER:** Since the main focus in this paper is on host-microbe-transcriptome interactions, the transcriptomics data *per se* serves mainly as proof of concept.

**Comment 3:** *The main novelty of this study is that skin microbiome and transcriptome data were collected at the same time, to allow for analysis of microbiome-transcriptome correlations. However, in their analysis, the authors did not reveal surprising information. By comparing the transcriptomes in AD samples with high abundance of *S. aureus* to those with low abundance of *S. aureus*, the authors found an enrichment of pathways such as "Keratinization" and enrichment in gene expression of IL18, IL1a, TNF, IFNg, and other expected pro-inflammatory cytokines (Figure 4C-D).*

*The analysis of psoriatic microbiomes to transcriptomes revealed that *Corynebacterium* spp may be negatively associated with inflammatory pathways in psoriasis (p.17, line 441-461). However, there are no mechanistic studies to suggest that *Corynebacterium* is protective. Additionally, earlier in the microbiome study, *Corynebacterium* was shown to be overrepresented in psoriatic lesions, which seems contradictory. Perhaps, some *Corynebacterium* species are immunoregulatory or help resistance towards more inflammatory bacteria and are therefore protective, whereas other *Corynebacterium* species are positive associated with psoriasis because they are more pro-inflammatory. This idea would be interesting, but would need additional studies in order to be validated.*

*There is another finding in the paper that I thought was interesting : abundance of anaerobic bacteria in AD was decreased suggesting that there is increased O<sub>2</sub> tension in AD lesions. (Figure 1D, discussed in line 555-557). An analysis of metabolic pathways upregulated in disease states was a very successful approach to show that utilization of formate and aerobic respiration by *E. coli* was increased in gut inflammation<sup>(8)</sup> and then that blocking this particular microbial metabolic pathway using tungsten could ameliorate colitis <sup>(9)</sup>. Therefore, if the authors were to use metagenomic sequencing instead of 16s rRNA sequencing to look at the*

*microbial metabolic pathways that were changed in disease states and correlate this to host transcriptome signatures, this study would be much more informative and more likely to generate hypotheses for further mechanistic studies.*

**ANSWER:** We thank reviewer for this interesting viewpoint. We address now the loss of anaerobes by citing work by Zeeuwen et al (2017) in the manuscript, who introduce a hypothesis regarding the ability of gram-positive anaerobe cocci to induce high levels of antimicrobial peptides in human keratinocytes, thereby strengthening the skin barrier. A complete or partial absence of these organisms, may therefore potentially favor colonization by *S. aureus*. Moreover, we observe metabolic shifts in the AD-associated microbiome (Figures 3-4), generating hypotheses for further mechanistic studies. For further details regarding these, please see above our response to reviewer #1, p. 2.

**Comment 4:** *The approach and intent of the study was commendable and as a field, we do need to move toward connecting microbiota changes to host epithelial or immunologic changes. However, the data presented here did not reveal many distinctive positive results. If the authors were to re-focus on some of the more interesting findings highlighted above and develop further mechanistic insight instead of presenting a broad overview of findings without specific hypotheses, this would greatly improve the impact of this study.*

**ANSWER:** We believe that we report here the by far largest patient material ever in the context of integrating the skin microbiome with the host's cutaneous transcriptome in AD and PSO – sampled simultaneously in the same individuals and anatomical locations. Making use of this exceptional resource, we present an overview of our observations, together with novel insights gained from observed correlations between the skin microbiota and host physiology. We have now added validations of 16S based taxonomy by whole genome sequencing (WGS), functional predictions based on the 16S markers, as well as functional insight based on WGS preliminary data. Moreover, we bring in mechanistic validation of the observed host-microbe interactions. Henceforth, this great resource will provide an exceptional asset for continued studies, digging deeper into the interplay between microbial communities in the skin and the regulation of atopic and psoriatic skin inflammation.

#### **References:**

1. Byrd, A. L. et al. Staphylococcus aureus and Staphylococcus epidermidis strain diversity underlying pediatric atopic dermatitis. *Sci. Transl. Med.* 9, eaal4651 (2017).
2. Kong, H. H. et al. Temporal shifts in the skin microbiome associated with disease flares and treatment in children with atopic dermatitis. *Genome Res.* 22, 850–859 (2012).
3. Yan, D. et al. The Role of the Skin and Gut Microbiome in Psoriatic Disease. *Curr. Dermatol. Rep.* 6, 94–103 (2017).
4. Ghosh, D. et al. Multiple Transcriptome Data Analysis Reveals Biologically Relevant Atopic Dermatitis Signature Genes and Pathways. *PLOS ONE* 10, e0144316 (2015).
5. Ewald, D. A. et al. Meta-analysis derived atopic dermatitis (MADAD) transcriptome defines a robust AD signature highlighting the involvement of atherosclerosis and lipid metabolism pathways. *BMC Med. Genomics* 8, (2015).
6. Jiang, S., Hincliffe, T. E. & Wu, T. Biomarkers of An Autoimmune Skin Disease—Psoriasis. *Genomics Proteomics Bioinformatics* 13, 224–233 (2015).
7. Lowes, M. A., Suárez-Fariñas, M. & Krueger, J. G. Immunology of Psoriasis. *Annu. Rev. Immunol.* 32, 227–255 (2014).
8. Hughes, E. R. et al. Microbial Respiration and Formate Oxidation as Metabolic Signatures of Inflammation-Associated Dysbiosis. *Cell Host Microbe* 21, 208–219 (2017).
9. Zhu, W. et al. Precision editing of the gut microbiota ameliorates colitis. *Nature* 553, 208–211 (2018).

Reviewers' comments:

Reviewer #1 (Remarks to the Author):

The manuscript has improved, but my impression remains that the value of this manuscript is not from new biological insights, but rather from the size of the dataset investigating simultaneously the microbiome (metagenome) and transcriptome, albeit the microbiome analysis is conducted at the 16S level where metagenomic data would have been desirable. It remains, as I previously noted, a clean, high quality, and well-written study, nonetheless.

One of the potential additional findings of the paper - the link between trp depletion and AD skin response has also been studied (most recently in Dec 2019 the decrease in trp/trp-related metabolites in AD skin was recently published - "A tryptophan metabolite of the skin microbiota attenuates inflammation in atopic dermatitis via the aryl hydrocarbon receptor" that needs to be cited).

The authors did attempt to provide additional data by sequencing 20 of their samples using shotgun metagenomics - how many millions of reads? How many after removal of human DNA? This is important to evaluate the potential depth and whether the trp pathway is actually present or absent. Was trp pathway analysis presence/absence, or can you say something about the relative abundance of the occurrence of the pathway. More generally, the use of PiCrust for strain-specific phenotypes (trp auxotrophy in a portion of strains) is not advised, as in this case, as it can lead to misleading inferences.

I maintain that looking at previous treatment as confounders is important given the high/low *S. aureus* categorization and previous literature on this point. This is a relatively straightforward analysis and there is not really a good reason that it has to be pushed to a second manuscript.

I am not convinced about the rebutting argument to use the 99.4% similarity by looking at the correlation in relative abundance of *S. aureus*. Basically that figure says that the classifications of *S. aureus* are OK (which I agree with), but it remains that the number of OTUs identified is highly inflated. Because the bulk of the analysis doesn't use the data at the OTU level, there is really no value to using this threshold that yields all these OTUs, and I would be sure that many of them are sequencing/technical/artifacts. Phylotyping would be largely fine given the point of the paper. While this is a technical point, it is a trivial one to correct towards a more conservative estimate of microbial diversity.

Reviewer #2 (Remarks to the Author):

I am satisfied with the additional data, information and conclusions in this revised manuscript. The focus on the tryptophan metabolism and the anaerobe discussion improves the unique conclusions of the paper. The inclusion of the metagenomic data is good, although since the PiCRUST stuff is still in there, the authors should show more validation, i.e. check to see if the genes they find in the PiCRUST analysis also correlate in these samples. Even 10 samples of each *S. aureus* high and low cohort, would be nice validation to show. The additional experimental detail is good. I would recommend making sure that the number of samples and the statistical tests used are in the figures. It takes a lot of searching to find this data and makes it hard to interpret at first glance. Another small comment—what immunofluorescence was used in Fig S10C—is the antibody specific to *S. aureus*? (It looks like it could just be DAPI?) I don't think details on the microscopy were included.

Reviewer #3 (Remarks to the Author):

In the revised manuscript, the authors used their transcriptomic data from AD samples with high vs low *S. aureus* abundance to define a host tissue “*S. aureus* signature”. They found the GO term “Tryptophan degradation” to be enriched in the *S. aureus* high group and they also found that *S. aureus* strains in the “high” group seemed to have more tryptophan biosynthesis genes and a majority grew independently of tryptophan.

Here, the authors are trying to draw a more direct connection between their host transcriptome data and their microbe 16s sequencing data, but the logic of this section was confusing to read. Specifically:

- Line 459 – may have a fragment of a sentence or a misplaced comma.
- Line 460-463 – I don't understand how enrichment of microbial pathways like “Phosphotransferase system” etc relate to tryptophan metabolism, which is what this paragraph seems to be mainly about.
- In Figure S11C, Table S4, they found that 66% of isolated *S. aureus* strains grew independently of tryptophan, and I think they are implying that this microbial trait was selected for by decreased host availability of tryptophan due to increased tryptophan metabolism. However, I

don't see in Figures S11C-D a comparison to *S. aureus* "low" AD samples. What if 66% of skin-associated *S. aureus* strains in AD are generally tryptophan-independent, whether or not they exist in a "high *S. aureus*" or "low *S. aureus*" microbial environment?

Additionally, the results regarding upregulated microbial pathways is based on inference from their 16s rRNA sequencing data using PICRUSt. My understanding is that this inference is only as good as the database of sequenced microbial genomes and the ability to match the sequenced strain genomes to the 16s rRNA sequence-generated OTU. Given that different strains of the same skin-colonizing bacterial species can have highly variable behavior in terms of virulence and immune stimulation, that a great number of skin bacterial strains are not sequenced (even if some members of the species have been sequenced), and that 16s rRNA sequencing cannot fully resolve strain-specific differences, how can the authors feel confident in their metagenomic inferences?

I do think, on page 25, the authors present an interesting idea. That is, the host attempt to limit available tryptophan as a defense mechanism against higher *S. aureus* colonization may then cause increased metabolites (such as 3-HAA), which are pro-inflammatory. It is then interesting to wonder if such metabolites like 3-HAA continue to help the host maintain a defensive immune barrier or if they backfire and feed into AD pathology. It is also interesting to wonder if the host defense mechanism of limiting tryptophan is unable to repress *S. aureus* colonization but does in fact repress colonization by benign commensal bacteria, and thus also inadvertently creates more dysbiosis. I wonder if the novelty of these points could be better expressed if the authors condensed lines 658-673 (which seem to mainly restate the results) and highlighted the implications of their data more.



Responses to the reviewers' comments:

**Reviewer #1 (Remarks to the Author):**

1. *The manuscript has improved, but my impression remains that the value of this manuscript is not from new biological insights, but rather from the size of the dataset investigating simultaneously the microbiome (metagenome) and transcriptome, albeit the microbiome analysis is conducted at the 16S level where metagenomic data would have been desirable. It remains, as I previously noted, a clean, high quality, and well-written study, nonetheless.*

*One of the potential additional findings of the paper - the **link between trp depletion and AD skin response** has also been studied (most recently in Dec 2019 the decrease in trp/trp-related metabolites in AD skin was recently published - "A tryptophan metabolite of the skin microbiota attenuates inflammation in atopic dermatitis via the aryl hydrocarbon receptor" that needs to be cited).*

*Was trp pathway analysis presence/absence, or can you say something about the relative abundance of the occurrence of the pathway. More generally, the use of PiCrust for strain-specific phenotypes (trp auxotrophy in a portion of strains) is not advised, as in this case, as it can lead to misleading inferences.*

*The authors did attempt to provide additional data by sequencing 20 of their samples using shotgun metagenomics - how many millions of reads? How many after removal of human DNA? This is important to evaluate the potential depth and whether the trp pathway is actually present or absent.*

**Answer:** The authors thank the reviewer for referring to the recent study by Yu *et al.* In the revised manuscript, we have now cited the study, please see page 26, lines 698-700. Although in the present work we did not investigate trp metabolites, we maintain that the simultaneous high-throughput characterization of trp metabolism genes in the host transcriptome and microbiome provides novel insights.

Detailed information on sequencing read counts for human and microbial DNA is provided in Table 1 of our point-by-point (please see below). Shotgun metagenomic libraries contained between 2-18.5% microbial DNA while read counts ranged from 0.15-5.5 million and were comparable to those achieved in recent large-scale microbiome studies by Chng *et al* or Tett *et al*<sup>1,2</sup>. Thus, taking into account the quality of WGS libraries, together with the additional information of independent culture-based Trp-dependence assays (Figure S12b), the authors feel confident in their WGS validation presented in Figure S12c in the manuscript. However, we agree that the role of Trp metabolites in host-microbial interactions in AD is an important issue to further explore in subsequent studies.

| Sample ID | Million reads sequenced | Filtered reads | Percentage microbiome |
|-----------|-------------------------|----------------|-----------------------|
| MB1       | 26.05                   | 725865         | 2.79                  |
| MB2       | 78.64                   | 2086180        | 2.65                  |
| MB3       | 54.77                   | 2772356        | 5.06                  |
| MB4       | 33.03                   | 2373752        | 7.19                  |
| MB5       | 43.94                   | 1728968        | 3.93                  |
| MB6       | 29.11                   | 5390992        | 18.52                 |
| MB7       | 19.94                   | 1354057        | 6.79                  |
| MB8       | 10.31                   | 208857         | 2.03                  |
| MB9       | 31.43                   | 2161375        | 6.88                  |
| MB10      | 18.9                    | 807488         | 4.27                  |
| MB11      | 52.6                    | 4442216        | 8.45                  |
| MB12      | 4.51                    | 149775         | 3.32                  |
| MB13      | 9.38                    | 1053178        | 11.23                 |
| MB14      | 21.55                   | 823947         | 3.82                  |
| MB15      | 52.28                   | 1323858        | 2.53                  |
| MB16      | 30.4                    | 1795493        | 5.91                  |
| MB17      | 28.23                   | 960793         | 3.40                  |
| MB18      | 34.17                   | 1408536        | 4.12                  |
| MB19      | 0.86                    | 136668         | 15.89                 |
| MB20      | 32.56                   | 2887738        | 8.87                  |
| Average   | 30.633                  | 1729604.6      | 6.38                  |

**Table 1.** Sequence reads before and after removing human DNA.

**2.** *I maintain that looking at previous treatment as confounders is important given the high/low S. aureus categorization and previous literature on this point. This is a relatively straightforward analysis and there is not really a good reason that it has to be pushed to a second manuscript.*

**Answer:** We analyzed the potential effect of treatments according to the reviewer suggestions, as shown in Table 2 or our point-by-point reply (please see TABLE 2 at the end of this document). Analysis was carried out in the same manner as confounding factor analysis for age, gender, sampling institution and body site, applying Wilcoxon rank-sum test followed by Benjamini-Hochberg multiple testing correction. We have found no significant associations between treatments and the top 95 most abundant microbiota in atopic dermatitis. In the case of psoriasis, a single *Acinetobacter* OTU showed an association ( $p=0.019$ ) with topical coal tar treatment. Topical coal tar treatment was only used in a small subset within the psoriasis cohort ( $n=24$ ). The specific *Acinetobacter* OTU did not demonstrate any significant associations with the host transcriptome and was not used or referenced in any analyses of the present study. Hence we decided not to include this information into the revised manuscript.

**3.** *I am not convinced about the rebutting argument to use the 99.4% similarity by looking at the correlation in relative abundance of S. aureus. Basically that figure says that the classifications of S. aureus are OK (which I agree with), but it remains that the number of OTUs identified is highly inflated. Because the bulk of the analysis doesn't use the data at the OTU level, there is really no value to using this threshold that yields all these OTUs, and I would be sure that many of them are sequencing/technical/artifacts. Phylotyping would be largely fine given the point of the paper. While this is a technical point, it is a trivial one to correct towards a more conservative estimate of microbial diversity.*

**Answer:** We appreciate this concern and we appreciate that the reviewer agrees that the OTU classifications are correct using the higher cutoff. We agree though, that the OTU number we have reported is unnecessarily high as a result. After careful analysis, we have found that the





**3. Another small comment—what immunofluorescence was used in Fig S10C—is the antibody specific to *S. aureus*? (It looks like it could just be DAPI?) I don't think details on the microscopy were included.**

**Answer:** In this experiment, a single *S. aureus* strain (ATCC 29213) was applied onto sterile 3D human epidermal equivalents. We indeed use DAPI (DAPI Fluoromount-G, Southern Biotech) to detect all DNA in the sample, hence the staining of both human DNA (keratinocyte nuclei) and the bacterial DNA on top of the stratum corneum. This staining allows for a visualization of the bacteria to determine the distribution of bacteria topically applied, but does not specifically discriminate bacterial species. Since we in this case applied a single bacterial strain, the DAPI stain herein used is sufficient to discriminate the bacteria in the 3D culture model.

**Reviewer #3 (Remarks to the Author):**

**1. In the revised manuscript, the authors used their transcriptomic data from AD samples with high vs low *S. aureus* abundance to define a host tissue “*S. aureus* signature”. They found the GO term “Tryptophan degradation” to be enriched in the *S. aureus* high group and they also found that *S. aureus* strains in the “high” group seemed to have more tryptophan biosynthesis genes and a majority grew independently of tryptophan.**

*Here, the authors are trying to draw a more direct connection between their host transcriptome data and their microbe 16s sequencing data, but the logic of this section was confusing to read. Specifically:*

*- Line 459 – may have a fragment of a sentence or a misplaced comma.*

*- Line 460-463 – I don't understand how enrichment of microbial pathways like “Phosphotransferase system” etc relate to tryptophan metabolism, which is what this paragraph seems to be mainly about.*

**Answer:** The authors thank the reviewer for this suggestion. The section has been rewritten. Please see page 18, lines 461-470, and page 26-27, lines 696-717. Figures S8 and S12 have been revised accordingly and rearranged for a clearer presentation of the referenced data.

**2. - In Figure S11C, Table S4, they found that 66% of isolated *S. aureus* strains grew independently of tryptophan, and I think they are implying that this microbial trait was selected for by decreased host availability of tryptophan due to increased tryptophan metabolism. However, I don't see in Figures S11C-D a comparison to *S. aureus* “low” AD samples. What if 66% of skin-associated *S. aureus* strains in AD are generally tryptophan-independent, whether or not they exist in a “high *S. aureus*” or “low *S. aureus*” microbial environment?**

**Answer:** In *S. aureus* ‘low’ samples, the pathogen is indeed absent, or present at extremely low abundance. Hence, isolation of *S. aureus* strains from these patients is not possible and the coverage of metagenomic shotgun sequencing for the species is also too shallow to identify *S. aureus*-specific Trp gene sequences with the necessary confidence. Trp-dependence assays were performed in *S. aureus* strains isolated from an independent AD collective and findings were confirmed by whole-genome metagenomic sequencing in the MAARS *S. aureus* ‘high’ cohort. On the other hand, assessment of the general independence of *S. aureus* strains from Trp requires analysis and data collection beyond the scope of our present study.

However, the hypothesis that the particular means of host defense by Trp depletion is ineffective against the majority of skin colonizing *S. aureus* strains in the *S. aureus* 'high' group is not affected by these limitations.

**3.** *Additionally, the results regarding upregulated microbial pathways is based on inference from their 16s rRNA sequencing data using PICRUSt. My understanding is that this inference is only as good as the database of sequenced microbial genomes and the ability to match the sequenced strain genomes to the 16s rRNA sequence-generated OTU. Given that different strains of the same skin-colonizing bacterial species can have highly variable behavior in terms of virulence and immune stimulation, that a great number of skin bacterial strains are not sequenced (even if some members of the species have been sequenced), and that 16s rRNA sequencing cannot fully resolve strain-specific differences, how can the authors feel confident in their metagenomic inferences?*

**Answer:** Although a significant limitation of prediction methods is, naturally, the missing information on yet unsequenced bacterial strains, the extended ancestral state-reconstruction algorithm developed for PICRUSt has produced up to  $r=0.8-0.9$  correlation with WGS datasets<sup>3</sup>. As our present study focused on a condition dominated by a single, well-studied and well-annotated species, we aimed to gain preliminary insight into the mechanisms of *S. aureus* colonization using the PICRUSt method. Furthermore, we have provided experimental validation of microbial genes predicted to show significantly higher abundance in *S. aureus*-high compared to *S. aureus*-low samples, using preliminary data from 10 whole-genome shotgun sequencing samples of each group. Our validation dataset shows a strikingly high concordance with the findings of 16S rRNA gene-based predictions.

**4.** *I do think, on page 25, the authors present an interesting idea. That is, the host attempt to limit available tryptophan as a defense mechanism against higher *S. aureus* colonization may then cause increased metabolites (such as 3-HAA), which are pro-inflammatory. It is then interesting to wonder if such metabolites like 3-HAA continue to help the host maintain a defensive immune barrier or if they backfire and feed into AD pathology. It is also interesting to wonder if the host defense mechanism of limiting tryptophan is unable to repress *S. aureus* colonization but does in fact repress colonization by benign commensal bacteria, and thus also inadvertently creates more dysbiosis. I wonder if the novelty of these points could be better expressed if the authors condensed lines 658-673 (which seem to mainly restate the results) and highlighted the implications of their data more.*

**Answer:** The authors thank the reviewer for this suggestion. The paragraph has been revised accordingly, on page 18, lines 461-470, and page 26-27, lines 696-717. Figures S8 and S12 have been rearranged for a clearer representation of supporting data.

## References

- 1 Chng, K. R. *et al.* Whole metagenome profiling reveals skin microbiome-dependent susceptibility to atopic dermatitis flare. *Nat Microbiol* **1**, 16106, doi:10.1038/nmicrobiol.2016.106 (2016).
- 2 Tett, A. *et al.* Unexplored diversity and strain-level structure of the skin microbiome associated with psoriasis. *NPJ Biofilms Microbiomes* **3**, 14, doi:10.1038/s41522-017-0022-5 (2017).
- 3 Langille, M. G. *et al.* Predictive functional profiling of microbial communities using 16S rRNA marker gene sequences. *Nat Biotechnol* **31**, 814-821, doi:10.1038/nbt.2676 (2013).

TABLE 2. Analysis of the effect of medical treatments on the microbial diversity analyses.

| AD                               |            |                             |            | PSO                              |            |                             |            |
|----------------------------------|------------|-----------------------------|------------|----------------------------------|------------|-----------------------------|------------|
| Wilcoxon rank-sum test statistic | P.adjusted | Treatment                   | OTU        | Wilcoxon rank-sum test statistic | P.adjusted | Treatment                   | OTU        |
| 438                              | 0.14435989 | Phototherapy                | OTU4422405 | 1697                             | 0.01960517 | TAR.topical.                | OTU4021335 |
| 483                              | 0.27270111 | Topicalcalcineurininhbitors | OTU1004369 | 1796                             | 0.09405471 | LocalCorticosteroids        | OTU4456068 |
| 560.5                            | 0.32639065 | Topicalcalcineurininhbitors | OTU3841245 | 819                              | 0.25029678 | LocalCorticosteroids        | OTU820692  |
| 543                              | 0.32639065 | Topicalcalcineurininhbitors | OTU4411187 | 2280,05,01                       | 0.25029678 | VitaminDanalogs             | OTU4411187 |
| 555                              | 0.33906797 | Phototherapy                | OTU4411187 | 1614                             | 0.25259955 | TAR.topical.                | OTU4482598 |
| 459.5                            | 0.56347641 | SystemicCorticosteroids     | OTU4446521 | 1702.5                           | 0.27002811 | LocalCorticosteroids        | OTU4346894 |
| 554                              | 0.59970951 | Phototherapy                | OTU1004369 | 716                              | 0.27002811 | LocalCorticosteroids        | OTU837884  |
| 635                              | 0.59970951 | Phototherapy                | OTU4348347 | 1542                             | 0.3601251  | Methotrexate                | OTU496787  |
| 615.5                            | 0.59970951 | Topicalcalcineurininhbitors | OTU4408996 | 1573                             | 0.3601251  | LocalCorticosteroids        | OTU4411187 |
| 589.5                            | 0.59970951 | Topicalcalcineurininhbitors | OTU4446521 | 936                              | 0.3601251  | Fumaricacid                 | OTU282360  |
| 583                              | 0.59970951 | Topicalcalcineurininhbitors | OTU912997  | 2309                             | 0.3601251  | VitaminDanalogs             | OTU4422405 |
| 527                              | 0.59970951 | SystemicCorticosteroids     | OTU4439089 | 1526                             | 0.3601251  | TAR.topical.                | OTU279980  |
| 264                              | 0.59970951 | Antibiotics                 | OTU378096  | 1470.5                           | 0.3601251  | TAR.topical.                | OTU4348347 |
| 223                              | 0.59970951 | Antibiotics                 | OTU4440643 | 1506                             | 0.3601251  | TAR.topical.                | OTU4468125 |
| 214                              | 0.60647265 | LocalCorticosteroids        | OTU4346894 | 743.5                            | 0.3601251  | Cyclosporin                 | OTU4476950 |
| 214                              | 0.60647265 | LocalCorticosteroids        | OTU4346894 | 1379                             | 0.40496133 | VitaminDanalogs             | OTU820692  |
| 646                              | 0.60647265 | Phototherapy                | OTU2110555 | 1116                             | 0.40496133 | Dithranol.minute            | OTU4468125 |
| 627                              | 0.60647265 | Phototherapy                | OTU3841245 | 1057                             | 0.40496133 | Dithranol.minute            | OTU883806  |
| 632.5                            | 0.60647265 | Topicalcalcineurininhbitors | OTU25478   | 1524                             | 0.41132963 | TAR.topical.                | OTU1036883 |
| 1061.5                           | 0.60647265 | Topicalcalcineurininhbitors | OTU4482598 | 1518.5                           | 0.55130905 | TAR.topical.                | OTU4047452 |
| 473                              | 0.60647265 | SystemicCorticosteroids     | OTU4349859 | 1098                             | 0.62742789 | Dithranol.minute            | OTU4309323 |
| 301                              | 0.60647265 | Cyclosporin                 | OTU4294554 | 888                              | 0.65432936 | Fumaricacid                 | OTU247720  |
| 270.5                            | 0.60647265 | Cyclosporin                 | OTU4476950 | 888                              | 0.65432936 | TAR.topical.                | OTU3841245 |
| 299                              | 0.60647265 | Cyclosporin                 | OTU565753  | 1142                             | 0.66960777 | Dithranol.minute            | OTU4456068 |
| 252.5                            | 0.60647265 | Antibiotics                 | OTU940083  | 672                              | 0.67189545 | Retinoids                   | OTU4408996 |
| 1015.5                           | 0.70370445 | Topicalcalcineurininhbitors | OTU3208510 | 1369                             | 0.67189545 | Methotrexate                | OTU987144  |
| 259                              | 0.70370445 | Antibiotics                 | OTU755148  | 589.5                            | 0.67189545 | Topicalcalcineurininhbitors | OTU4369229 |
| 256                              | 0.75101766 | LocalCorticosteroids        | OTU4411187 | 203                              | 0.67189545 | Topicalcalcineurininhbitors | OTU4422718 |
| 256                              | 0.75101766 | LocalCorticosteroids        | OTU4411187 | 196                              | 0.67189545 | Topicalcalcineurininhbitors | OTU851917  |
| 629                              | 0.75101766 | Topicalcalcineurininhbitors | OTU1131523 | 420                              | 0.67189545 | Fumaricacid                 | OTU4411187 |
| 637                              | 0.75101766 | Topicalcalcineurininhbitors | OTU403853  | 2182                             | 0.67189545 | VitaminDanalogs             | OTU4474056 |
| 661                              | 0.75101766 | Topicalcalcineurininhbitors | OTU4309323 | 2169                             | 0.67189545 | VitaminDanalogs             | OTU851917  |
| 611                              | 0.75101766 | Topicalcalcineurininhbitors | OTU4346894 | 2212                             | 0.67189545 | VitaminDanalogs             | OTU912997  |
| 650                              | 0.75101766 | Topicalcalcineurininhbitors | OTU4474056 | 1442.5                           | 0.67189545 | TAR.topical.                | OTU103810  |
| 996                              | 0.75101766 | Topicalcalcineurininhbitors | OTU819937  | 804                              | 0.67189545 | Photochemotherapy           | OTU4408996 |
| 607                              | 0.75101766 | Topicalcalcineurininhbitors | OTU837884  | 696.5                            | 0.67189545 | Cyclosporin                 | OTU4309323 |
| 280                              | 0.75101766 | Cyclosporin                 | OTU1036883 | 1094                             | 0.67189545 | Dithranol.minute            | OTU4021335 |
| 302                              | 0.75101766 | Cyclosporin                 | OTU4303697 | 206.5                            | 0.70787186 | Topicalcalcineurininhbitors | OTU360483  |
| 280                              | 0.75101766 | Cyclosporin                 | OTU4482598 | 1959,05,01                       | 0.71306337 | Phototherapy                | OTU25478   |
| 265                              | 0.75101766 | Antibiotics                 | OTU1081372 | 783.5                            | 0.73211584 | Photochemotherapy           | OTU4301457 |
| 257                              | 0.75101766 | Antibiotics                 | OTU1131523 | 557                              | 0.78626063 | Dithranol.minute            | OTU20360   |
| 296                              | 0.75101766 | Antibiotics                 | OTU4294554 | 564.5                            | 0.78626063 | Dithranol.minute            | OTU4349519 |
| 64                               | 0.75101766 | Methotrexate                | OTU4021335 | 1536                             | 0.79423233 | LocalCorticosteroids        | OTU4369229 |
| 62                               | 0.75101766 | Methotrexate                | OTU4294554 | 584                              | 0.79423233 | Topicalcalcineurininhbitors | OTU4480063 |
| 63                               | 0.75101766 | Methotrexate                | OTU565753  | 549                              | 0.83709956 | Topicalcalcineurininhbitors | OTU4350124 |
| 294.5                            | 0.75972604 | Cyclosporin                 | OTU4299324 | 547                              | 0.83709956 | Dithranol.minute            | OTU285376  |
| 305                              | 0.75972604 | Cyclosporin                 | OTU625320  | 1463                             | 0.8447206  | TAR.topical.                | OTU4346894 |
| 281                              | 0.81474028 | LocalCorticosteroids        | OTU1004369 | 346.5                            | 0.86593812 | SystemicCorticosteroids     | OTU378096  |
| 304                              | 0.81474028 | LocalCorticosteroids        | OTU2901965 | 703                              | 0.86795704 | Cyclosporin                 | OTU995817  |
| 284                              | 0.81474028 | LocalCorticosteroids        | OTU403853  | 868                              | 0.87688108 | Fumaricacid                 | OTU4440643 |
| 299                              | 0.81474028 | LocalCorticosteroids        | OTU4309323 | 1527.5                           | 0.89311589 | LocalCorticosteroids        | OTU4480063 |
| 280.5                            | 0.81474028 | LocalCorticosteroids        | OTU4317476 | 114                              | 0.89311589 | Antibiotics                 | OTU987144  |
| 260                              | 0.81474028 | LocalCorticosteroids        | OTU4422405 | 416                              | 0.90423024 | Fumaricacid                 | OTU4354809 |
| 267                              | 0.81474028 | LocalCorticosteroids        | OTU4456068 | 575                              | 0.90423024 | Dithranol.minute            | OTU370309  |
| 276                              | 0.81474028 | LocalCorticosteroids        | OTU837884  | 841                              | 0.91128509 | Methotrexate                | OTU279980  |
| 297                              | 0.81474028 | LocalCorticosteroids        | OTU851917  | 221                              | 0.91128509 | Topicalcalcineurininhbitors | OTU4474056 |
| 281                              | 0.81474028 | LocalCorticosteroids        | OTU1004369 | 757                              | 0.91605862 | Retinoids                   | OTU1107940 |
| 304                              | 0.81474028 | LocalCorticosteroids        | OTU2901965 | 756.5                            | 0.91605862 | Retinoids                   | OTU13445   |
| 284                              | 0.81474028 | LocalCorticosteroids        | OTU403853  | 1174                             | 0.91605862 | Retinoids                   | OTU205025  |
| 299                              | 0.81474028 | LocalCorticosteroids        | OTU4309323 | 687.5                            | 0.91605862 | Retinoids                   | OTU4301457 |
| 280.5                            | 0.81474028 | LocalCorticosteroids        | OTU4317476 | 1219                             | 0.91605862 | Retinoids                   | OTU4349859 |
| 260                              | 0.81474028 | LocalCorticosteroids        | OTU4422405 | 1147                             | 0.91605862 | Retinoids                   | OTU565753  |
| 267                              | 0.81474028 | LocalCorticosteroids        | OTU4456068 | 1210.5                           | 0.91605862 | Retinoids                   | OTU837884  |
| 276                              | 0.81474028 | LocalCorticosteroids        | OTU837884  | 1157                             | 0.91605862 | Retinoids                   | OTU851925  |
| 297                              | 0.81474028 | LocalCorticosteroids        | OTU851917  | 745                              | 0.91605862 | Retinoids                   | OTU912906  |
| 970.5                            | 0.81474028 | Phototherapy                | OTU1003210 | 1326.5                           | 0.91605862 | Methotrexate                | OTU247720  |
| 695                              | 0.81474028 | Phototherapy                | OTU25259   | 1375                             | 0.91605862 | Methotrexate                | OTU282360  |
| 703                              | 0.81474028 | Phototherapy                | OTU2901965 | 1344                             | 0.91605862 | Methotrexate                | OTU625320  |
| 714                              | 0.81474028 | Phototherapy                | OTU360483  | 1372                             | 0.91605862 | Methotrexate                | OTU995817  |
| 697.5                            | 0.81474028 | Phototherapy                | OTU4299324 | 949.5                            | 0.91605862 | LocalCorticosteroids        | OTU1003210 |
| 959                              | 0.81474028 | Phototherapy                | OTU4306540 | 920                              | 0.91605862 | LocalCorticosteroids        | OTU1081372 |
| 636.5                            | 0.81474028 | Phototherapy                | OTU4349859 | 949.5                            | 0.91605862 | LocalCorticosteroids        | OTU282360  |
| 694                              | 0.81474028 | Phototherapy                | OTU4354809 | 969                              | 0.91605862 | LocalCorticosteroids        | OTU4294554 |
| 698.5                            | 0.81474028 | Phototherapy                | OTU4440643 | 916.5                            | 0.91605862 | LocalCorticosteroids        | OTU505749  |
| 673.5                            | 0.81474028 | Phototherapy                | OTU4446521 | 536                              | 0.91605862 | Topicalcalcineurininhbitors | OTU1036883 |
| 662.5                            | 0.81474028 | Phototherapy                | OTU4456068 | 250                              | 0.91605862 | Topicalcalcineurininhbitors | OTU370134  |
| 689.5                            | 0.81474028 | Phototherapy                | OTU4467218 | 531                              | 0.91605862 | Topicalcalcineurininhbitors | OTU4021335 |



|            |            |                              |            |
|------------|------------|------------------------------|------------|
| 715        | 0.81474028 | Phototherapy                 | OTU4473201 |
| 677        | 0.81474028 | Phototherapy                 | OTU4480063 |
| 670.5      | 0.81474028 | Phototherapy                 | OTU496787  |
| 693        | 0.81474028 | Phototherapy                 | OTU511475  |
| 951        | 0.81474028 | Topicalcalcineurininhibitors | OTU164003  |
| 669.5      | 0.81474028 | Topicalcalcineurininhibitors | OTU20360   |
| 738        | 0.81474028 | Topicalcalcineurininhibitors | OTU4294554 |
| 706        | 0.81474028 | Topicalcalcineurininhibitors | OTU4299324 |
| 704.5      | 0.81474028 | Topicalcalcineurininhibitors | OTU4318084 |
| 690        | 0.81474028 | Topicalcalcineurininhibitors | OTU4349519 |
| 650.5      | 0.81474028 | Topicalcalcineurininhibitors | OTU4349859 |
| 980        | 0.81474028 | Topicalcalcineurininhibitors | OTU4353642 |
| 980        | 0.81474028 | Topicalcalcineurininhibitors | OTU4421536 |
| 636        | 0.81474028 | Topicalcalcineurininhibitors | OTU4422405 |
| 946        | 0.81474028 | Topicalcalcineurininhibitors | OTU505749  |
| 695        | 0.81474028 | Topicalcalcineurininhibitors | OTU511475  |
| 704.5      | 0.81474028 | Topicalcalcineurininhibitors | OTU940083  |
| 680        | 0.81474028 | Topicalcalcineurininhibitors | OTU995817  |
| 575        | 0.81474028 | SystemicCorticosteroids      | OTU1131523 |
| 821        | 0.81474028 | SystemicCorticosteroids      | OTU14278   |
| 841        | 0.81474028 | SystemicCorticosteroids      | OTU205025  |
| 564        | 0.81474028 | SystemicCorticosteroids      | OTU3841245 |
| 827        | 0.81474028 | SystemicCorticosteroids      | OTU4306540 |
| 564        | 0.81474028 | SystemicCorticosteroids      | OTU4309323 |
| 587.5      | 0.81474028 | SystemicCorticosteroids      | OTU4411187 |
| 526        | 0.81474028 | SystemicCorticosteroids      | OTU4422405 |
| 546        | 0.81474028 | SystemicCorticosteroids      | OTU4440643 |
| 836        | 0.81474028 | SystemicCorticosteroids      | OTU4468125 |
| 573        | 0.81474028 | SystemicCorticosteroids      | OTU4480063 |
| 534        | 0.81474028 | SystemicCorticosteroids      | OTU837884  |
| 604        | 0.81474028 | SystemicCorticosteroids      | OTU851925  |
| 298        | 0.81474028 | Cyclosporin                  | OTU1081372 |
| 335.5      | 0.81474028 | Cyclosporin                  | OTU247720  |
| 316        | 0.81474028 | Cyclosporin                  | OTU2901965 |
| 316.5      | 0.81474028 | Cyclosporin                  | OTU370309  |
| 349        | 0.81474028 | Cyclosporin                  | OTU4021335 |
| 330        | 0.81474028 | Cyclosporin                  | OTU4353642 |
| 530        | 0.81474028 | Cyclosporin                  | OTU4354809 |
| 557.5      | 0.81474028 | Cyclosporin                  | OTU4369229 |
| 344        | 0.81474028 | Cyclosporin                  | OTU4422718 |
| 320        | 0.81474028 | Cyclosporin                  | OTU4439089 |
| 296        | 0.81474028 | Cyclosporin                  | OTU4440643 |
| 318        | 0.81474028 | Cyclosporin                  | OTU4474056 |
| 300.5      | 0.81474028 | Cyclosporin                  | OTU912997  |
| 301        | 0.81474028 | Cyclosporin                  | OTU995817  |
| 306        | 0.81474028 | Antibiotics                  | OTU2901965 |
| 286        | 0.81474028 | Antibiotics                  | OTU370134  |
| 497        | 0.81474028 | Antibiotics                  | OTU403853  |
| 271        | 0.81474028 | Antibiotics                  | OTU4301457 |
| 295        | 0.81474028 | Antibiotics                  | OTU4349519 |
| 291.5      | 0.81474028 | Antibiotics                  | OTU4482598 |
| 299        | 0.81474028 | Antibiotics                  | OTU565753  |
| 308.5      | 0.81474028 | Antibiotics                  | OTU820692  |
| 278        | 0.81474028 | Antibiotics                  | OTU837884  |
| 489.5      | 0.81474028 | Antibiotics                  | OTU987144  |
| 172.5      | 0.81474028 | Methotrexate                 | OTU4317476 |
| 174        | 0.81474028 | Methotrexate                 | OTU4354809 |
| 178.5      | 0.81474028 | Methotrexate                 | OTU4369229 |
| 72         | 0.81474028 | Methotrexate                 | OTU4439089 |
| 1965,05,01 | 0.81474028 | Methotrexate                 | OTU4481323 |
| 54         | 0.81474028 | Methotrexate                 | OTU883806  |
| 597.5      | 0.82412327 | SystemicCorticosteroids      | OTU25478   |
| 300        | 0.82412327 | Antibiotics                  | OTU4474056 |
| 311        | 0.8289316  | Cyclosporin                  | OTU4422405 |
| 612        | 0.83018581 | SystemicCorticosteroids      | OTU114999  |
| 729.5      | 0.8326991  | Topicalcalcineurininhibitors | OTU4349522 |
| 575        | 0.8326991  | SystemicCorticosteroids      | OTU1004369 |
| 503        | 0.8326991  | Cyclosporin                  | OTU205025  |
| 691        | 0.8334532  | Topicalcalcineurininhibitors | OTU1096610 |
| 329        | 0.8334532  | Cyclosporin                  | OTU4349519 |
| 325        | 0.8334532  | Cyclosporin                  | OTU4446521 |
| 333.5      | 0.8334532  | Cyclosporin                  | OTU940083  |
| 471        | 0.8334532  | Antibiotics                  | OTU4327286 |
| 319.5      | 0.8334532  | Antibiotics                  | OTU912906  |
| 699        | 0.83440212 | Topicalcalcineurininhibitors | OTU4301457 |
| 599        | 0.83440212 | SystemicCorticosteroids      | OTU4299324 |
| 294.5      | 0.83686604 | LocalCorticosteroids         | OTU4349859 |
| 459        | 0.83686604 | LocalCorticosteroids         | OTU4353642 |
| 299        | 0.83686604 | LocalCorticosteroids         | OTU4369229 |
| 318        | 0.83686604 | LocalCorticosteroids         | OTU4460228 |
| 297        | 0.83686604 | LocalCorticosteroids         | OTU4480063 |
| 294.5      | 0.83686604 | LocalCorticosteroids         | OTU4349859 |

|            |            |                              |            |
|------------|------------|------------------------------|------------|
| 545        | 0.91605862 | Topicalcalcineurininhibitors | OTU4449324 |
| 248.5      | 0.91605862 | Topicalcalcineurininhibitors | OTU761594  |
| 522        | 0.91605862 | Topicalcalcineurininhibitors | OTU912906  |
| 845.5      | 0.91605862 | Fumaricacid                  | OTU285376  |
| 800        | 0.91605862 | Fumaricacid                  | OTU4294554 |
| 459        | 0.91605862 | Fumaricacid                  | OTU4306540 |
| 110        | 0.91605862 | Antibiotics                  | OTU205025  |
| 118        | 0.91605862 | Antibiotics                  | OTU360483  |
| 117        | 0.91605862 | Antibiotics                  | OTU4021335 |
| 2110,05,01 | 0.91605862 | VitaminDanalogs              | OTU164003  |
| 2005       | 0.91605862 | VitaminDanalogs              | OTU3841245 |
| 1449       | 0.91605862 | VitaminDanalogs              | OTU4301457 |
| 2083       | 0.91605862 | VitaminDanalogs              | OTU4349519 |
| 2081       | 0.91605862 | VitaminDanalogs              | OTU4446521 |
| 1442       | 0.91605862 | VitaminDanalogs              | OTU4482598 |
| 1411       | 0.91605862 | TAR.topical.                 | OTU4421536 |
| 889        | 0.91605862 | TAR.topical.                 | OTU625320  |
| 1337.5     | 0.91605862 | Photochemotherapy            | OTU114999  |
| 1342       | 0.91605862 | Photochemotherapy            | OTU4327286 |
| 1370       | 0.91605862 | Photochemotherapy            | OTU851917  |
| 120        | 0.91605862 | SystemicCorticosteroids      | OTU1003210 |
| 98         | 0.91605862 | SystemicCorticosteroids      | OTU4346894 |
| 106        | 0.91605862 | SystemicCorticosteroids      | OTU4474056 |
| 345        | 0.91605862 | SystemicCorticosteroids      | OTU4482598 |
| 118        | 0.91605862 | SystemicCorticosteroids      | OTU851917  |
| 1283       | 0.91605862 | Phototherapy                 | OTU4349859 |
| 1334       | 0.91605862 | Phototherapy                 | OTU4353642 |
| 346.5      | 0.91605862 | Cyclosporin                  | OTU13445   |
| 307        | 0.91605862 | Cyclosporin                  | OTU4480063 |
| 656        | 0.91605862 | Dithranol.minute             | OTU3841245 |
| 1016       | 0.91605862 | Dithranol.minute             | OTU4299324 |
| 1067       | 0.91605862 | Dithranol.minute             | OTU4346894 |
| 652        | 0.91605862 | Dithranol.minute             | OTU820692  |
| 605        | 0.91605862 | Dithranol.minute             | OTU851917  |
| 122        | 0.91743109 | SystemicCorticosteroids      | OTU4422718 |
| 1100       | 0.91868516 | Retinoids                    | OTU1036883 |
| 765        | 0.91868516 | Retinoids                    | OTU1081372 |
| 849.5      | 0.91868516 | Retinoids                    | OTU1096610 |
| 817.5      | 0.91868516 | Retinoids                    | OTU1131523 |
| 844        | 0.91868516 | Retinoids                    | OTU14278   |
| 775        | 0.91868516 | Retinoids                    | OTU25259   |
| 1111.5     | 0.91868516 | Retinoids                    | OTU25478   |
| 806        | 0.91868516 | Retinoids                    | OTU279980  |
| 852        | 0.91868516 | Retinoids                    | OTU2901965 |
| 773        | 0.91868516 | Retinoids                    | OTU362390  |
| 1109.5     | 0.91868516 | Retinoids                    | OTU378096  |
| 1036       | 0.91868516 | Retinoids                    | OTU4047452 |
| 796        | 0.91868516 | Retinoids                    | OTU4294554 |
| 843        | 0.91868516 | Retinoids                    | OTU4299324 |
| 1124.5     | 0.91868516 | Retinoids                    | OTU4327286 |
| 790        | 0.91868516 | Retinoids                    | OTU4327300 |
| 813        | 0.91868516 | Retinoids                    | OTU4349519 |
| 758.5      | 0.91868516 | Retinoids                    | OTU4349522 |
| 1048       | 0.91868516 | Retinoids                    | OTU4350124 |
| 848        | 0.91868516 | Retinoids                    | OTU4353642 |
| 866        | 0.91868516 | Retinoids                    | OTU4421536 |
| 863.5      | 0.91868516 | Retinoids                    | OTU4440643 |
| 1066.5     | 0.91868516 | Retinoids                    | OTU4449324 |
| 1063       | 0.91868516 | Retinoids                    | OTU4456068 |
| 759        | 0.91868516 | Retinoids                    | OTU4460228 |
| 1081.5     | 0.91868516 | Retinoids                    | OTU4468125 |
| 1051       | 0.91868516 | Retinoids                    | OTU4473201 |
| 867        | 0.91868516 | Retinoids                    | OTU4474056 |
| 844.5      | 0.91868516 | Retinoids                    | OTU4476950 |
| 785.5      | 0.91868516 | Retinoids                    | OTU4480063 |
| 1107       | 0.91868516 | Retinoids                    | OTU4481323 |
| 1117       | 0.91868516 | Retinoids                    | OTU4482598 |
| 796        | 0.91868516 | Retinoids                    | OTU505749  |
| 763.5      | 0.91868516 | Retinoids                    | OTU610043  |
| 865        | 0.91868516 | Retinoids                    | OTU654307  |
| 844        | 0.91868516 | Retinoids                    | OTU755148  |
| 861        | 0.91868516 | Retinoids                    | OTU819937  |
| 1037       | 0.91868516 | Retinoids                    | OTU820692  |
| 826        | 0.91868516 | Retinoids                    | OTU851668  |
| 811.5      | 0.91868516 | Retinoids                    | OTU939571  |
| 1035       | 0.91868516 | Retinoids                    | OTU940083  |
| 1115       | 0.91868516 | Retinoids                    | OTU987144  |
| 1112       | 0.91868516 | Retinoids                    | OTU995817  |
| 1297.5     | 0.91868516 | Methotrexate                 | OTU1003210 |
| 1349       | 0.91868516 | Methotrexate                 | OTU1004369 |
| 966        | 0.91868516 | Methotrexate                 | OTU1107940 |
| 1206       | 0.91868516 | Methotrexate                 | OTU1131523 |

|            |            |                              |            |
|------------|------------|------------------------------|------------|
| 459        | 0.83686604 | LocalCorticosteroids         | OTU4353642 |
| 299        | 0.83686604 | LocalCorticosteroids         | OTU4369229 |
| 318        | 0.83686604 | LocalCorticosteroids         | OTU4460228 |
| 297        | 0.83686604 | LocalCorticosteroids         | OTU4480063 |
| 723.5      | 0.83686604 | Phototherapy                 | OTU4309323 |
| 953        | 0.83686604 | Phototherapy                 | OTU755148  |
| 697        | 0.83686604 | Phototherapy                 | OTU837884  |
| 742        | 0.83686604 | Topicalcalcineurininhibitors | OTU4306540 |
| 704        | 0.83686604 | Topicalcalcineurininhibitors | OTU4480063 |
| 734.5      | 0.83686604 | Topicalcalcineurininhibitors | OTU74351   |
| 623.5      | 0.83686604 | SystemicCorticosteroids      | OTU360483  |
| 341.5      | 0.83686604 | Cyclosporin                  | OTU4481323 |
| 493.5      | 0.83686604 | Cyclosporin                  | OTU4367144 |
| 290        | 0.83686604 | Antibiotics                  | OTU4349859 |
| 482        | 0.83686604 | Antibiotics                  | OTU4369229 |
| 464        | 0.84847136 | Antibiotics                  | OTU2110555 |
| 940.5      | 0.86477402 | Phototherapy                 | OTU610043  |
| 632        | 0.87530452 | SystemicCorticosteroids      | OTU4294554 |
| 313        | 0.87530452 | Antibiotics                  | OTU4299324 |
| 739        | 0.87835509 | Phototherapy                 | OTU851925  |
| 748        | 0.87835509 | Topicalcalcineurininhibitors | OTU4422718 |
| 715        | 0.88522086 | Phototherapy                 | OTU403853  |
| 340        | 0.88522086 | Cyclosporin                  | OTU4327300 |
| 321        | 0.90452158 | LocalCorticosteroids         | OTU205025  |
| 321        | 0.90452158 | LocalCorticosteroids         | OTU205025  |
| 608        | 0.90452158 | SystemicCorticosteroids      | OTU4474056 |
| 348        | 0.90452158 | Cyclosporin                  | OTU25259   |
| 318.5      | 0.91840204 | LocalCorticosteroids         | OTU3841245 |
| 315        | 0.91840204 | LocalCorticosteroids         | OTU4468125 |
| 324        | 0.91840204 | LocalCorticosteroids         | OTU4473664 |
| 465        | 0.91840204 | LocalCorticosteroids         | OTU4482598 |
| 474        | 0.91840204 | LocalCorticosteroids         | OTU883806  |
| 318.5      | 0.91840204 | LocalCorticosteroids         | OTU3841245 |
| 315        | 0.91840204 | LocalCorticosteroids         | OTU4468125 |
| 324        | 0.91840204 | LocalCorticosteroids         | OTU4473664 |
| 465        | 0.91840204 | LocalCorticosteroids         | OTU4482598 |
| 474        | 0.91840204 | LocalCorticosteroids         | OTU883806  |
| 727        | 0.91840204 | Phototherapy                 | OTU20360   |
| 723.5      | 0.91840204 | Phototherapy                 | OTU4317476 |
| 965        | 0.91840204 | Phototherapy                 | OTU883806  |
| 727.5      | 0.91840204 | Topicalcalcineurininhibitors | OTU4317476 |
| 791        | 0.91840204 | SystemicCorticosteroids      | OTU1003210 |
| 615        | 0.91840204 | SystemicCorticosteroids      | OTU1036883 |
| 602        | 0.91840204 | SystemicCorticosteroids      | OTU4346894 |
| 482        | 0.91840204 | Cyclosporin                  | OTU114999  |
| 350        | 0.91840204 | Cyclosporin                  | OTU13445   |
| 352        | 0.91840204 | Cyclosporin                  | OTU2110555 |
| 462        | 0.91840204 | Cyclosporin                  | OTU279980  |
| 341.5      | 0.91840204 | Cyclosporin                  | OTU4318084 |
| 492        | 0.91840204 | Cyclosporin                  | OTU4471315 |
| 349        | 0.91840204 | Cyclosporin                  | OTU755148  |
| 324        | 0.91840204 | Antibiotics                  | OTU103810  |
| 471.5      | 0.91840204 | Antibiotics                  | OTU4467218 |
| 1980,05,01 | 0.91840204 | Methotrexate                 | OTU4299324 |
| 1981,05,01 | 0.91840204 | Methotrexate                 | OTU4309323 |
| 164        | 0.91840204 | Methotrexate                 | OTU4449324 |
| 157.5      | 0.91840204 | Methotrexate                 | OTU4471315 |
| 74         | 0.91840204 | Methotrexate                 | OTU995817  |
| 352        | 0.92031903 | LocalCorticosteroids         | OTU279980  |
| 440        | 0.92031903 | LocalCorticosteroids         | OTU4294554 |
| 314        | 0.92031903 | LocalCorticosteroids         | OTU4301457 |
| 319        | 0.92031903 | LocalCorticosteroids         | OTU4449324 |
| 319        | 0.92031903 | LocalCorticosteroids         | OTU496787  |
| 334        | 0.92031903 | LocalCorticosteroids         | OTU74351   |
| 332        | 0.92031903 | LocalCorticosteroids         | OTU851925  |
| 323.5      | 0.92031903 | LocalCorticosteroids         | OTU939571  |
| 352        | 0.92031903 | LocalCorticosteroids         | OTU279980  |
| 440        | 0.92031903 | LocalCorticosteroids         | OTU4294554 |
| 314        | 0.92031903 | LocalCorticosteroids         | OTU4301457 |
| 319        | 0.92031903 | LocalCorticosteroids         | OTU4449324 |
| 319        | 0.92031903 | LocalCorticosteroids         | OTU496787  |
| 334        | 0.92031903 | LocalCorticosteroids         | OTU74351   |
| 332        | 0.92031903 | LocalCorticosteroids         | OTU851925  |
| 323.5      | 0.92031903 | LocalCorticosteroids         | OTU939571  |
| 924        | 0.92031903 | Phototherapy                 | OTU13445   |
| 918.5      | 0.92031903 | Phototherapy                 | OTU14278   |
| 749.5      | 0.92031903 | Phototherapy                 | OTU4481323 |
| 758.5      | 0.92031903 | Phototherapy                 | OTU74351   |
| 743        | 0.92031903 | Phototherapy                 | OTU851917  |
| 925.5      | 0.92031903 | Topicalcalcineurininhibitors | OTU103810  |
| 923        | 0.92031903 | Topicalcalcineurininhibitors | OTU13445   |
| 898        | 0.92031903 | Topicalcalcineurininhibitors | OTU279980  |

|        |            |                      |            |
|--------|------------|----------------------|------------|
| 917    | 0.91868516 | Methotrexate         | OTU13445   |
| 965.5  | 0.91868516 | Methotrexate         | OTU164003  |
| 1322.5 | 0.91868516 | Methotrexate         | OTU20360   |
| 1278   | 0.91868516 | Methotrexate         | OTU205025  |
| 1213   | 0.91868516 | Methotrexate         | OTU2110555 |
| 1199.5 | 0.91868516 | Methotrexate         | OTU25478   |
| 1334   | 0.91868516 | Methotrexate         | OTU285376  |
| 1215.5 | 0.91868516 | Methotrexate         | OTU2901965 |
| 1257   | 0.91868516 | Methotrexate         | OTU3208510 |
| 1242.5 | 0.91868516 | Methotrexate         | OTU360483  |
| 1210   | 0.91868516 | Methotrexate         | OTU362390  |
| 1272   | 0.91868516 | Methotrexate         | OTU378096  |
| 1289.5 | 0.91868516 | Methotrexate         | OTU403853  |
| 1229   | 0.91868516 | Methotrexate         | OTU4294554 |
| 863    | 0.91868516 | Methotrexate         | OTU4301457 |
| 912    | 0.91868516 | Methotrexate         | OTU4306540 |
| 1254.5 | 0.91868516 | Methotrexate         | OTU4309323 |
| 1195   | 0.91868516 | Methotrexate         | OTU4317476 |
| 1229.5 | 0.91868516 | Methotrexate         | OTU4327286 |
| 930    | 0.91868516 | Methotrexate         | OTU4346894 |
| 943    | 0.91868516 | Methotrexate         | OTU4348347 |
| 1026   | 0.91868516 | Methotrexate         | OTU4350124 |
| 986    | 0.91868516 | Methotrexate         | OTU4354809 |
| 1010   | 0.91868516 | Methotrexate         | OTU4408996 |
| 1221   | 0.91868516 | Methotrexate         | OTU4411187 |
| 1283   | 0.91868516 | Methotrexate         | OTU4422718 |
| 1020   | 0.91868516 | Methotrexate         | OTU4439089 |
| 1006   | 0.91868516 | Methotrexate         | OTU4456068 |
| 984    | 0.91868516 | Methotrexate         | OTU4468125 |
| 1189   | 0.91868516 | Methotrexate         | OTU4471315 |
| 923    | 0.91868516 | Methotrexate         | OTU4473664 |
| 1241   | 0.91868516 | Methotrexate         | OTU4476950 |
| 920.5  | 0.91868516 | Methotrexate         | OTU4480063 |
| 1290   | 0.91868516 | Methotrexate         | OTU565753  |
| 1021   | 0.91868516 | Methotrexate         | OTU654307  |
| 1326   | 0.91868516 | Methotrexate         | OTU755148  |
| 964.5  | 0.91868516 | Methotrexate         | OTU761594  |
| 1207.5 | 0.91868516 | Methotrexate         | OTU819937  |
| 940.5  | 0.91868516 | Methotrexate         | OTU851668  |
| 1276   | 0.91868516 | Methotrexate         | OTU851925  |
| 993    | 0.91868516 | Methotrexate         | OTU912906  |
| 1009   | 0.91868516 | Methotrexate         | OTU912997  |
| 1010   | 0.91868516 | LocalCorticosteroids | OTU1004369 |
| 1340.5 | 0.91868516 | LocalCorticosteroids | OTU103810  |
| 1426   | 0.91868516 | LocalCorticosteroids | OTU1131523 |
| 1007   | 0.91868516 | LocalCorticosteroids | OTU114999  |
| 1417.5 | 0.91868516 | LocalCorticosteroids | OTU164003  |
| 964    | 0.91868516 | LocalCorticosteroids | OTU20360   |
| 1313   | 0.91868516 | LocalCorticosteroids | OTU205025  |
| 1069   | 0.91868516 | LocalCorticosteroids | OTU2110555 |
| 1081   | 0.91868516 | LocalCorticosteroids | OTU247720  |
| 1007   | 0.91868516 | LocalCorticosteroids | OTU25259   |
| 1334   | 0.91868516 | LocalCorticosteroids | OTU25478   |
| 1003   | 0.91868516 | LocalCorticosteroids | OTU279980  |
| 1099   | 0.91868516 | LocalCorticosteroids | OTU285376  |
| 1114   | 0.91868516 | LocalCorticosteroids | OTU3208510 |
| 1365   | 0.91868516 | LocalCorticosteroids | OTU3841245 |
| 1313   | 0.91868516 | LocalCorticosteroids | OTU4021335 |
| 1079.5 | 0.91868516 | LocalCorticosteroids | OTU4047452 |
| 1353   | 0.91868516 | LocalCorticosteroids | OTU4299324 |
| 1116   | 0.91868516 | LocalCorticosteroids | OTU4301457 |
| 1313   | 0.91868516 | LocalCorticosteroids | OTU4303697 |
| 1400   | 0.91868516 | LocalCorticosteroids | OTU4306540 |
| 1401.5 | 0.91868516 | LocalCorticosteroids | OTU4309323 |
| 1038   | 0.91868516 | LocalCorticosteroids | OTU4317476 |
| 1323.5 | 0.91868516 | LocalCorticosteroids | OTU4327286 |
| 1096   | 0.91868516 | LocalCorticosteroids | OTU4327300 |
| 1341   | 0.91868516 | LocalCorticosteroids | OTU4348347 |
| 1066.5 | 0.91868516 | LocalCorticosteroids | OTU4349522 |
| 1345   | 0.91868516 | LocalCorticosteroids | OTU4349859 |
| 1103   | 0.91868516 | LocalCorticosteroids | OTU4350124 |
| 1104   | 0.91868516 | LocalCorticosteroids | OTU4353642 |
| 1106   | 0.91868516 | LocalCorticosteroids | OTU4421536 |
| 1398   | 0.91868516 | LocalCorticosteroids | OTU4422405 |
| 994    | 0.91868516 | LocalCorticosteroids | OTU4422718 |
| 1314   | 0.91868516 | LocalCorticosteroids | OTU4439089 |
| 1077.5 | 0.91868516 | LocalCorticosteroids | OTU4440643 |
| 996    | 0.91868516 | LocalCorticosteroids | OTU4460228 |
| 1057.5 | 0.91868516 | LocalCorticosteroids | OTU4467218 |
| 1379.5 | 0.91868516 | LocalCorticosteroids | OTU4468125 |
| 1025   | 0.91868516 | LocalCorticosteroids | OTU4473201 |
| 1038   | 0.91868516 | LocalCorticosteroids | OTU4473664 |

|            |            |                              |            |
|------------|------------|------------------------------|------------|
| 720.5      | 0.92031903 | Topicalcalcineurininhibitors | OTU285376  |
| 925.5      | 0.92031903 | Topicalcalcineurininhibitors | OTU4327286 |
| 736        | 0.92031903 | Topicalcalcineurininhibitors | OTU4369229 |
| 758        | 0.92031903 | Topicalcalcineurininhibitors | OTU4439089 |
| 760        | 0.92031903 | Topicalcalcineurininhibitors | OTU4460228 |
| 732.5      | 0.92031903 | Topicalcalcineurininhibitors | OTU496787  |
| 610.5      | 0.92031903 | SystemicCorticosteroids      | OTU912997  |
| 360        | 0.92031903 | Cyclosporin                  | OTU164003  |
| 356.5      | 0.92031903 | Cyclosporin                  | OTU25478   |
| 364        | 0.92031903 | Cyclosporin                  | OTU4348347 |
| 362        | 0.92031903 | Cyclosporin                  | OTU4473664 |
| 341        | 0.92031903 | Antibiotics                  | OTU4021335 |
| 458        | 0.92031903 | Antibiotics                  | OTU511475  |
| 448        | 0.92031903 | Antibiotics                  | OTU74351   |
| 151.5      | 0.92031903 | Methotrexate                 | OTU103810  |
| 150        | 0.92031903 | Methotrexate                 | OTU205025  |
| 150        | 0.92031903 | Methotrexate                 | OTU2110555 |
| 151.5      | 0.92031903 | Methotrexate                 | OTU2901965 |
| 150        | 0.92031903 | Methotrexate                 | OTU4303697 |
| 151.5      | 0.92031903 | Methotrexate                 | OTU4327286 |
| 150        | 0.92031903 | Methotrexate                 | OTU4421536 |
| 1985,05,01 | 0.92031903 | Methotrexate                 | OTU4476950 |
| 339        | 0.93187609 | LocalCorticosteroids         | OTU114999  |
| 339        | 0.93187609 | LocalCorticosteroids         | OTU114999  |
| 450.5      | 0.93187609 | Antibiotics                  | OTU4471315 |
| 441        | 0.93187609 | Antibiotics                  | OTU819937  |
| 916.5      | 0.93681361 | Topicalcalcineurininhibitors | OTU14278   |
| 332.5      | 0.94192026 | LocalCorticosteroids         | OTU4299324 |
| 332.5      | 0.94192026 | LocalCorticosteroids         | OTU4299324 |
| 758.5      | 0.94192026 | Topicalcalcineurininhibitors | OTU2901965 |
| 756        | 0.94192026 | Topicalcalcineurininhibitors | OTU851917  |
| 800        | 0.94192026 | SystemicCorticosteroids      | OTU4354809 |
| 645        | 0.94192026 | SystemicCorticosteroids      | OTU4473201 |
| 636        | 0.94192026 | SystemicCorticosteroids      | OTU4476950 |
| 460        | 0.94192026 | Antibiotics                  | OTU4346894 |
| 148.5      | 0.94192026 | Methotrexate                 | OTU4408996 |
| 924        | 0.94476845 | Phototherapy                 | OTU4349519 |
| 766        | 0.94476845 | Topicalcalcineurininhibitors | OTU247720  |
| 752.5      | 0.94476845 | Topicalcalcineurininhibitors | OTU4440643 |
| 637        | 0.94476845 | SystemicCorticosteroids      | OTU4327300 |
| 778        | 0.94476845 | SystemicCorticosteroids      | OTU4353642 |
| 349        | 0.94476845 | Cyclosporin                  | OTU1096610 |
| 368        | 0.94476845 | Cyclosporin                  | OTU4460228 |
| 480        | 0.94476845 | Cyclosporin                  | OTU4468125 |
| 438        | 0.94476845 | Antibiotics                  | OTU1003210 |
| 355.5      | 0.94476845 | Antibiotics                  | OTU1107940 |
| 339        | 0.94476845 | Antibiotics                  | OTU13445   |
| 444.5      | 0.94476845 | Antibiotics                  | OTU4309323 |
| 332        | 0.94476845 | Antibiotics                  | OTU4411187 |
| 341        | 0.94476845 | Antibiotics                  | OTU4439089 |
| 145.5      | 0.94476845 | Methotrexate                 | OTU14278   |
| 147        | 0.94476845 | Methotrexate                 | OTU370134  |
| 145.5      | 0.94476845 | Methotrexate                 | OTU74351   |
| 145.5      | 0.94476845 | Methotrexate                 | OTU987144  |
| 424.5      | 0.9462391  | LocalCorticosteroids         | OTU851668  |
| 337.5      | 0.9462391  | LocalCorticosteroids         | OTU940083  |
| 424.5      | 0.9462391  | LocalCorticosteroids         | OTU851668  |
| 337.5      | 0.9462391  | LocalCorticosteroids         | OTU940083  |
| 762        | 0.9462391  | Phototherapy                 | OTU25478   |
| 912.5      | 0.9462391  | Phototherapy                 | OTU4473664 |
| 483        | 0.9462391  | Cyclosporin                  | OTU403853  |
| 763        | 0.9462448  | Topicalcalcineurininhibitors | OTU362390  |
| 336        | 0.94820623 | Antibiotics                  | OTU4327300 |
| 144        | 0.94929792 | Methotrexate                 | OTU164003  |
| 144        | 0.94929792 | Methotrexate                 | OTU4353642 |
| 144        | 0.94929792 | Methotrexate                 | OTU4473201 |
| 449        | 0.95678303 | Antibiotics                  | OTU4354809 |
| 438        | 0.9591508  | LocalCorticosteroids         | OTU25259   |
| 333        | 0.9591508  | LocalCorticosteroids         | OTU4354809 |
| 438        | 0.9591508  | LocalCorticosteroids         | OTU25259   |
| 333        | 0.9591508  | LocalCorticosteroids         | OTU4354809 |
| 887.5      | 0.9591508  | Phototherapy                 | OTU851668  |
| 774.5      | 0.9591508  | Phototherapy                 | OTU987144  |
| 898        | 0.9591508  | Topicalcalcineurininhibitors | OTU4021335 |
| 760.5      | 0.9591508  | Topicalcalcineurininhibitors | OTU939571  |
| 641        | 0.9591508  | SystemicCorticosteroids      | OTU511475  |
| 773.5      | 0.9591508  | SystemicCorticosteroids      | OTU987144  |
| 386        | 0.9591508  | Cyclosporin                  | OTU851668  |
| 151        | 0.9591508  | Methotrexate                 | OTU4467218 |
| 142.5      | 0.9591508  | Methotrexate                 | OTU819937  |
| 358        | 0.96584504 | Cyclosporin                  | OTU1004369 |
| 775.5      | 0.97030547 | Phototherapy                 | OTU4350124 |

|        |            |                              |            |
|--------|------------|------------------------------|------------|
| 1011   | 0.91868516 | LocalCorticosteroids         | OTU4474056 |
| 1014.5 | 0.91868516 | LocalCorticosteroids         | OTU610043  |
| 1099   | 0.91868516 | LocalCorticosteroids         | OTU625320  |
| 1120   | 0.91868516 | LocalCorticosteroids         | OTU654307  |
| 1327   | 0.91868516 | LocalCorticosteroids         | OTU74351   |
| 1040   | 0.91868516 | LocalCorticosteroids         | OTU761594  |
| 1061   | 0.91868516 | LocalCorticosteroids         | OTU851668  |
| 1064   | 0.91868516 | LocalCorticosteroids         | OTU851917  |
| 1279   | 0.91868516 | LocalCorticosteroids         | OTU883806  |
| 977.5  | 0.91868516 | LocalCorticosteroids         | OTU939571  |
| 1406   | 0.91868516 | LocalCorticosteroids         | OTU940083  |
| 1367   | 0.91868516 | LocalCorticosteroids         | OTU987144  |
| 332    | 0.91868516 | Topicalcalcineurininhibitors | OTU1003210 |
| 505    | 0.91868516 | Topicalcalcineurininhibitors | OTU1004369 |
| 308    | 0.91868516 | Topicalcalcineurininhibitors | OTU1096610 |
| 294    | 0.91868516 | Topicalcalcineurininhibitors | OTU1107940 |
| 313.5  | 0.91868516 | Topicalcalcineurininhibitors | OTU114999  |
| 447    | 0.91868516 | Topicalcalcineurininhibitors | OTU205025  |
| 314    | 0.91868516 | Topicalcalcineurininhibitors | OTU247720  |
| 444    | 0.91868516 | Topicalcalcineurininhibitors | OTU25259   |
| 315.5  | 0.91868516 | Topicalcalcineurininhibitors | OTU25478   |
| 293.5  | 0.91868516 | Topicalcalcineurininhibitors | OTU282360  |
| 296.5  | 0.91868516 | Topicalcalcineurininhibitors | OTU2901965 |
| 325    | 0.91868516 | Topicalcalcineurininhibitors | OTU3208510 |
| 309.5  | 0.91868516 | Topicalcalcineurininhibitors | OTU370309  |
| 455    | 0.91868516 | Topicalcalcineurininhibitors | OTU378096  |
| 318.5  | 0.91868516 | Topicalcalcineurininhibitors | OTU3841245 |
| 494.5  | 0.91868516 | Topicalcalcineurininhibitors | OTU4039323 |
| 330    | 0.91868516 | Topicalcalcineurininhibitors | OTU4294554 |
| 329    | 0.91868516 | Topicalcalcineurininhibitors | OTU4299324 |
| 512    | 0.91868516 | Topicalcalcineurininhibitors | OTU4303697 |
| 481    | 0.91868516 | Topicalcalcineurininhibitors | OTU4306540 |
| 441    | 0.91868516 | Topicalcalcineurininhibitors | OTU4309323 |
| 472    | 0.91868516 | Topicalcalcineurininhibitors | OTU4317476 |
| 456    | 0.91868516 | Topicalcalcineurininhibitors | OTU4318084 |
| 458    | 0.91868516 | Topicalcalcineurininhibitors | OTU4327300 |
| 456    | 0.91868516 | Topicalcalcineurininhibitors | OTU4346894 |
| 458    | 0.91868516 | Topicalcalcineurininhibitors | OTU4348347 |
| 329.5  | 0.91868516 | Topicalcalcineurininhibitors | OTU4349519 |
| 330.5  | 0.91868516 | Topicalcalcineurininhibitors | OTU4349522 |
| 474    | 0.91868516 | Topicalcalcineurininhibitors | OTU4349859 |
| 489    | 0.91868516 | Topicalcalcineurininhibitors | OTU4354809 |
| 452    | 0.91868516 | Topicalcalcineurininhibitors | OTU4411187 |
| 473    | 0.91868516 | Topicalcalcineurininhibitors | OTU4422405 |
| 465    | 0.91868516 | Topicalcalcineurininhibitors | OTU4456068 |
| 298.5  | 0.91868516 | Topicalcalcineurininhibitors | OTU4467218 |
| 323    | 0.91868516 | Topicalcalcineurininhibitors | OTU4471315 |
| 315    | 0.91868516 | Topicalcalcineurininhibitors | OTU4473201 |
| 503.5  | 0.91868516 | Topicalcalcineurininhibitors | OTU4496787 |
| 287    | 0.91868516 | Topicalcalcineurininhibitors | OTU565753  |
| 321.5  | 0.91868516 | Topicalcalcineurininhibitors | OTU610043  |
| 512    | 0.91868516 | Topicalcalcineurininhibitors | OTU74351   |
| 314.5  | 0.91868516 | Topicalcalcineurininhibitors | OTU819937  |
| 294    | 0.91868516 | Topicalcalcineurininhibitors | OTU820692  |
| 322    | 0.91868516 | Topicalcalcineurininhibitors | OTU883806  |
| 274    | 0.91868516 | Topicalcalcineurininhibitors | OTU995817  |
| 793    | 0.91868516 | Fumaricacid                  | OTU1003210 |
| 512    | 0.91868516 | Fumaricacid                  | OTU1036883 |
| 764    | 0.91868516 | Fumaricacid                  | OTU1081372 |
| 741    | 0.91868516 | Fumaricacid                  | OTU1096610 |
| 712    | 0.91868516 | Fumaricacid                  | OTU1107940 |
| 754.5  | 0.91868516 | Fumaricacid                  | OTU1131523 |
| 723    | 0.91868516 | Fumaricacid                  | OTU14278   |
| 747.5  | 0.91868516 | Fumaricacid                  | OTU20360   |
| 736    | 0.91868516 | Fumaricacid                  | OTU205025  |
| 726    | 0.91868516 | Fumaricacid                  | OTU25259   |
| 498    | 0.91868516 | Fumaricacid                  | OTU25478   |
| 707    | 0.91868516 | Fumaricacid                  | OTU370134  |
| 749.5  | 0.91868516 | Fumaricacid                  | OTU378096  |
| 581.5  | 0.91868516 | Fumaricacid                  | OTU3841245 |
| 765    | 0.91868516 | Fumaricacid                  | OTU4021335 |
| 759    | 0.91868516 | Fumaricacid                  | OTU4047452 |
| 557.5  | 0.91868516 | Fumaricacid                  | OTU4301457 |
| 722    | 0.91868516 | Fumaricacid                  | OTU4318084 |
| 729.5  | 0.91868516 | Fumaricacid                  | OTU4327286 |
| 484.5  | 0.91868516 | Fumaricacid                  | OTU4346894 |
| 577    | 0.91868516 | Fumaricacid                  | OTU4348347 |
| 729.5  | 0.91868516 | Fumaricacid                  | OTU4349519 |
| 729    | 0.91868516 | Fumaricacid                  | OTU4349522 |
| 555.5  | 0.91868516 | Fumaricacid                  | OTU4349859 |
| 584    | 0.91868516 | Fumaricacid                  | OTU4353642 |
| 541    | 0.91868516 | Fumaricacid                  | OTU4369229 |



|            |            |                              |            |
|------------|------------|------------------------------|------------|
| 331        | 0.97162011 | LocalCorticosteroids         | OTU1096610 |
| 341.5      | 0.97162011 | LocalCorticosteroids         | OTU282360  |
| 427        | 0.97162011 | LocalCorticosteroids         | OTU654307  |
| 331        | 0.97162011 | LocalCorticosteroids         | OTU1096610 |
| 341.5      | 0.97162011 | LocalCorticosteroids         | OTU282360  |
| 427        | 0.97162011 | LocalCorticosteroids         | OTU654307  |
| 771        | 0.97162011 | Phototherapy                 | OTU940083  |
| 757.5      | 0.97162011 | Topicalcalcineurininhibitors | OTU4456068 |
| 777        | 0.97162011 | SystemicCorticosteroids      | OTU1081372 |
| 632        | 0.97162011 | SystemicCorticosteroids      | OTU1096610 |
| 651        | 0.97162011 | SystemicCorticosteroids      | OTU13445   |
| 779        | 0.97162011 | SystemicCorticosteroids      | OTU282360  |
| 654        | 0.97162011 | SystemicCorticosteroids      | OTU370309  |
| 371.5      | 0.97162011 | Cyclosporin                  | OTU4309323 |
| 478        | 0.97162011 | Cyclosporin                  | OTU4480063 |
| 382        | 0.97162011 | Cyclosporin                  | OTU654307  |
| 334        | 0.97162011 | Antibiotics                  | OTU995817  |
| 139.5      | 0.97162011 | Methotrexate                 | OTU360483  |
| 97         | 0.97162011 | Methotrexate                 | OTU378096  |
| 149        | 0.97162011 | Methotrexate                 | OTU403853  |
| 139.5      | 0.97162011 | Methotrexate                 | OTU505749  |
| 88         | 0.97162011 | Methotrexate                 | OTU912997  |
| 352        | 0.97342505 | Antibiotics                  | OTU4422718 |
| 354        | 0.97546845 | LocalCorticosteroids         | OTU378096  |
| 432.5      | 0.97546845 | LocalCorticosteroids         | OTU4327286 |
| 427        | 0.97546845 | LocalCorticosteroids         | OTU565753  |
| 354        | 0.97546845 | LocalCorticosteroids         | OTU378096  |
| 432.5      | 0.97546845 | LocalCorticosteroids         | OTU4327286 |
| 427        | 0.97546845 | LocalCorticosteroids         | OTU565753  |
| 904        | 0.97546845 | Phototherapy                 | OTU4327286 |
| 913        | 0.97546845 | Phototherapy                 | OTU4369229 |
| 762        | 0.97546845 | Phototherapy                 | OTU995817  |
| 778        | 0.97546845 | Topicalcalcineurininhibitors | OTU2110555 |
| 766        | 0.97546845 | Topicalcalcineurininhibitors | OTU4467218 |
| 775.5      | 0.97546845 | Topicalcalcineurininhibitors | OTU761594  |
| 676        | 0.97546845 | SystemicCorticosteroids      | OTU279980  |
| 645        | 0.97546845 | SystemicCorticosteroids      | OTU403853  |
| 651        | 0.97546845 | SystemicCorticosteroids      | OTU851917  |
| 465        | 0.97546845 | Cyclosporin                  | OTU4327286 |
| 354        | 0.97546845 | Antibiotics                  | OTU4306540 |
| 340.5      | 0.97546845 | Antibiotics                  | OTU496787  |
| 1991,05,01 | 0.97546845 | Methotrexate                 | OTU4440643 |
| 138        | 0.97546845 | Methotrexate                 | OTU654307  |
| 880.5      | 0.97553677 | Topicalcalcineurininhibitors | OTU851668  |
| 380        | 0.97691141 | Cyclosporin                  | OTU4350124 |
| 97         | 0.97691141 | Methotrexate                 | OTU4349522 |
| 897        | 0.97740412 | Phototherapy                 | OTU4460228 |
| 776.5      | 0.97740412 | Topicalcalcineurininhibitors | OTU4471315 |
| 759        | 0.97740412 | SystemicCorticosteroids      | OTU378096  |
| 365.5      | 0.97740412 | Cyclosporin                  | OTU285376  |
| 890        | 0.97760614 | Phototherapy                 | OTU505749  |
| 774.5      | 0.97760614 | SystemicCorticosteroids      | OTU4482598 |
| 384.5      | 0.97760614 | Cyclosporin                  | OTU378096  |
| 356        | 0.98870701 | LocalCorticosteroids         | OTU4306540 |
| 356        | 0.98870701 | LocalCorticosteroids         | OTU4306540 |
| 377.5      | 0.98870701 | Cyclosporin                  | OTU761594  |
| 897        | 0.98882508 | Topicalcalcineurininhibitors | OTU205025  |
| 146        | 0.99481531 | Methotrexate                 | OTU4346894 |
| 430.5      | 0.99785764 | LocalCorticosteroids         | OTU4476950 |
| 343        | 0.99785764 | LocalCorticosteroids         | OTU995817  |
| 430.5      | 0.99785764 | LocalCorticosteroids         | OTU4476950 |
| 343        | 0.99785764 | LocalCorticosteroids         | OTU995817  |
| 793        | 0.99959501 | Topicalcalcineurininhibitors | OTU360483  |
| 901        | 0.99959501 | Topicalcalcineurininhibitors | OTU4468125 |
| 428        | 0.99959501 | Antibiotics                  | OTU4303697 |
| 94         | 0.99959501 | Methotrexate                 | OTU4047452 |
| 381.5      | 1          | LocalCorticosteroids         | OTU1003210 |
| 431        | 1          | LocalCorticosteroids         | OTU1036883 |
| 360.5      | 1          | LocalCorticosteroids         | OTU103810  |
| 366        | 1          | LocalCorticosteroids         | OTU1081372 |
| 385        | 1          | LocalCorticosteroids         | OTU1107940 |
| 359        | 1          | LocalCorticosteroids         | OTU1131523 |
| 401        | 1          | LocalCorticosteroids         | OTU13445   |
| 411        | 1          | LocalCorticosteroids         | OTU14278   |
| 374        | 1          | LocalCorticosteroids         | OTU164003  |
| 404        | 1          | LocalCorticosteroids         | OTU20360   |
| 396        | 1          | LocalCorticosteroids         | OTU2110555 |
| 375.5      | 1          | LocalCorticosteroids         | OTU247720  |
| 386        | 1          | LocalCorticosteroids         | OTU25478   |
| 424.5      | 1          | LocalCorticosteroids         | OTU285376  |
| 410        | 1          | LocalCorticosteroids         | OTU3208510 |
| 395.5      | 1          | LocalCorticosteroids         | OTU360483  |

|            |            |             |            |
|------------|------------|-------------|------------|
| 724        | 0.91868516 | Fumaricacid | OTU4421536 |
| 534        | 0.91868516 | Fumaricacid | OTU4422405 |
| 733        | 0.91868516 | Fumaricacid | OTU4422718 |
| 772        | 0.91868516 | Fumaricacid | OTU4446521 |
| 523        | 0.91868516 | Fumaricacid | OTU4449324 |
| 486.5      | 0.91868516 | Fumaricacid | OTU4456068 |
| 809        | 0.91868516 | Fumaricacid | OTU4460228 |
| 777.5      | 0.91868516 | Fumaricacid | OTU4467218 |
| 522        | 0.91868516 | Fumaricacid | OTU4468125 |
| 529        | 0.91868516 | Fumaricacid | OTU4480063 |
| 775.5      | 0.91868516 | Fumaricacid | OTU4496787 |
| 770        | 0.91868516 | Fumaricacid | OTU505749  |
| 699        | 0.91868516 | Fumaricacid | OTU511475  |
| 767        | 0.91868516 | Fumaricacid | OTU625320  |
| 775        | 0.91868516 | Fumaricacid | OTU755148  |
| 727        | 0.91868516 | Fumaricacid | OTU851917  |
| 709        | 0.91868516 | Fumaricacid | OTU883806  |
| 715        | 0.91868516 | Fumaricacid | OTU987144  |
| 755        | 0.91868516 | Fumaricacid | OTU995817  |
| 2019,05,31 | 0.91868516 | Antibiotics | OTU1003210 |
| 30         | 0.91868516 | Antibiotics | OTU1036883 |
| 96         | 0.91868516 | Antibiotics | OTU103810  |
| 29         | 0.91868516 | Antibiotics | OTU1081372 |
| 30         | 0.91868516 | Antibiotics | OTU1096610 |
| 1934,05,01 | 0.91868516 | Antibiotics | OTU1131523 |
| 1935,05,01 | 0.91868516 | Antibiotics | OTU114999  |
| 40         | 0.91868516 | Antibiotics | OTU14278   |
| 80         | 0.91868516 | Antibiotics | OTU164003  |
| 112        | 0.91868516 | Antibiotics | OTU2110555 |
| 1937,05,01 | 0.91868516 | Antibiotics | OTU247720  |
| 33         | 0.91868516 | Antibiotics | OTU25259   |
| 1935,05,01 | 0.91868516 | Antibiotics | OTU25478   |
| 37         | 0.91868516 | Antibiotics | OTU279980  |
| 1933,05,01 | 0.91868516 | Antibiotics | OTU282360  |
| 97         | 0.91868516 | Antibiotics | OTU2901965 |
| 40         | 0.91868516 | Antibiotics | OTU3208510 |
| 1939,05,01 | 0.91868516 | Antibiotics | OTU362390  |
| 1933,05,01 | 0.91868516 | Antibiotics | OTU370134  |
| 2019,05,28 | 0.91868516 | Antibiotics | OTU370309  |
| 102        | 0.91868516 | Antibiotics | OTU403853  |
| 92         | 0.91868516 | Antibiotics | OTU4047452 |
| 40         | 0.91868516 | Antibiotics | OTU4299324 |
| 34         | 0.91868516 | Antibiotics | OTU4303697 |
| 1933,05,01 | 0.91868516 | Antibiotics | OTU4306540 |
| 1939,05,01 | 0.91868516 | Antibiotics | OTU4309323 |
| 30         | 0.91868516 | Antibiotics | OTU4317476 |
| 100        | 0.91868516 | Antibiotics | OTU4318084 |
| 101        | 0.91868516 | Antibiotics | OTU4327286 |
| 29         | 0.91868516 | Antibiotics | OTU4327300 |
| 98         | 0.91868516 | Antibiotics | OTU4346894 |
| 1932,05,01 | 0.91868516 | Antibiotics | OTU4349519 |
| 1936,05,01 | 0.91868516 | Antibiotics | OTU4349522 |
| 97         | 0.91868516 | Antibiotics | OTU4350124 |
| 41         | 0.91868516 | Antibiotics | OTU4353642 |
| 24         | 0.91868516 | Antibiotics | OTU4354809 |
| 37         | 0.91868516 | Antibiotics | OTU4408996 |
| 1940,05,01 | 0.91868516 | Antibiotics | OTU4411187 |
| 93         | 0.91868516 | Antibiotics | OTU4421536 |
| 97         | 0.91868516 | Antibiotics | OTU4422405 |
| 32         | 0.91868516 | Antibiotics | OTU4422718 |
| 35         | 0.91868516 | Antibiotics | OTU4439089 |
| 2019,05,27 | 0.91868516 | Antibiotics | OTU4440643 |
| 86         | 0.91868516 | Antibiotics | OTU4446521 |
| 98         | 0.91868516 | Antibiotics | OTU4456068 |
| 34         | 0.91868516 | Antibiotics | OTU4460228 |
| 2019,05,22 | 0.91868516 | Antibiotics | OTU4467218 |
| 1940,05,01 | 0.91868516 | Antibiotics | OTU4468125 |
| 82         | 0.91868516 | Antibiotics | OTU4471315 |
| 80         | 0.91868516 | Antibiotics | OTU4473201 |
| 33         | 0.91868516 | Antibiotics | OTU4473664 |
| 28         | 0.91868516 | Antibiotics | OTU4474056 |
| 1936,05,01 | 0.91868516 | Antibiotics | OTU4476950 |
| 2019,05,18 | 0.91868516 | Antibiotics | OTU4480063 |
| 106        | 0.91868516 | Antibiotics | OTU4481323 |
| 104        | 0.91868516 | Antibiotics | OTU4482598 |
| 85         | 0.91868516 | Antibiotics | OTU4496787 |
| 29         | 0.91868516 | Antibiotics | OTU505749  |
| 35         | 0.91868516 | Antibiotics | OTU625320  |
| 40         | 0.91868516 | Antibiotics | OTU654307  |
| 89         | 0.91868516 | Antibiotics | OTU74351   |
| 31         | 0.91868516 | Antibiotics | OTU755148  |
| 1938,05,01 | 0.91868516 | Antibiotics | OTU761594  |



|       |   |                      |            |
|-------|---|----------------------|------------|
| 395   | 1 | LocalCorticosteroids | OTU362390  |
| 372   | 1 | LocalCorticosteroids | OTU370134  |
| 423   | 1 | LocalCorticosteroids | OTU370309  |
| 396   | 1 | LocalCorticosteroids | OTU4021335 |
| 410   | 1 | LocalCorticosteroids | OTU4047452 |
| 358   | 1 | LocalCorticosteroids | OTU4303697 |
| 375.5 | 1 | LocalCorticosteroids | OTU4318084 |
| 378   | 1 | LocalCorticosteroids | OTU4327300 |
| 377.5 | 1 | LocalCorticosteroids | OTU4348347 |
| 402   | 1 | LocalCorticosteroids | OTU4349519 |
| 375.5 | 1 | LocalCorticosteroids | OTU4349522 |
| 405   | 1 | LocalCorticosteroids | OTU4350124 |
| 394   | 1 | LocalCorticosteroids | OTU4408996 |
| 390   | 1 | LocalCorticosteroids | OTU4421536 |
| 392   | 1 | LocalCorticosteroids | OTU4422718 |
| 381   | 1 | LocalCorticosteroids | OTU4439089 |
| 393.5 | 1 | LocalCorticosteroids | OTU4440643 |
| 369.5 | 1 | LocalCorticosteroids | OTU4446521 |
| 353.5 | 1 | LocalCorticosteroids | OTU4467218 |
| 376   | 1 | LocalCorticosteroids | OTU4471315 |
| 386   | 1 | LocalCorticosteroids | OTU4473201 |
| 407   | 1 | LocalCorticosteroids | OTU4474056 |
| 394   | 1 | LocalCorticosteroids | OTU4481323 |
| 399.5 | 1 | LocalCorticosteroids | OTU505749  |
| 413   | 1 | LocalCorticosteroids | OTU511475  |
| 380.5 | 1 | LocalCorticosteroids | OTU610043  |
| 395   | 1 | LocalCorticosteroids | OTU625320  |
| 378   | 1 | LocalCorticosteroids | OTU755148  |
| 388   | 1 | LocalCorticosteroids | OTU761594  |
| 380.5 | 1 | LocalCorticosteroids | OTU819937  |
| 385.5 | 1 | LocalCorticosteroids | OTU820692  |
| 390.5 | 1 | LocalCorticosteroids | OTU912906  |
| 410.5 | 1 | LocalCorticosteroids | OTU912997  |
| 415   | 1 | LocalCorticosteroids | OTU987144  |
| 381.5 | 1 | LocalCorticosteroids | OTU1003210 |
| 431   | 1 | LocalCorticosteroids | OTU1036883 |
| 360.5 | 1 | LocalCorticosteroids | OTU103810  |
| 366   | 1 | LocalCorticosteroids | OTU1081372 |
| 385   | 1 | LocalCorticosteroids | OTU1107940 |
| 359   | 1 | LocalCorticosteroids | OTU1131523 |
| 401   | 1 | LocalCorticosteroids | OTU13445   |
| 411   | 1 | LocalCorticosteroids | OTU14278   |
| 374   | 1 | LocalCorticosteroids | OTU164003  |
| 404   | 1 | LocalCorticosteroids | OTU20360   |
| 396   | 1 | LocalCorticosteroids | OTU2110555 |
| 375.5 | 1 | LocalCorticosteroids | OTU247720  |
| 386   | 1 | LocalCorticosteroids | OTU25478   |
| 424.5 | 1 | LocalCorticosteroids | OTU285376  |
| 410   | 1 | LocalCorticosteroids | OTU3208510 |
| 395.5 | 1 | LocalCorticosteroids | OTU360483  |
| 395   | 1 | LocalCorticosteroids | OTU362390  |
| 372   | 1 | LocalCorticosteroids | OTU370134  |
| 423   | 1 | LocalCorticosteroids | OTU370309  |
| 396   | 1 | LocalCorticosteroids | OTU4021335 |
| 410   | 1 | LocalCorticosteroids | OTU4047452 |
| 358   | 1 | LocalCorticosteroids | OTU4303697 |
| 375.5 | 1 | LocalCorticosteroids | OTU4318084 |
| 378   | 1 | LocalCorticosteroids | OTU4327300 |
| 377.5 | 1 | LocalCorticosteroids | OTU4348347 |
| 402   | 1 | LocalCorticosteroids | OTU4349519 |
| 375.5 | 1 | LocalCorticosteroids | OTU4349522 |
| 405   | 1 | LocalCorticosteroids | OTU4350124 |
| 394   | 1 | LocalCorticosteroids | OTU4408996 |
| 390   | 1 | LocalCorticosteroids | OTU4421536 |
| 392   | 1 | LocalCorticosteroids | OTU4422718 |
| 381   | 1 | LocalCorticosteroids | OTU4439089 |
| 393.5 | 1 | LocalCorticosteroids | OTU4440643 |
| 369.5 | 1 | LocalCorticosteroids | OTU4446521 |
| 353.5 | 1 | LocalCorticosteroids | OTU4467218 |
| 376   | 1 | LocalCorticosteroids | OTU4471315 |
| 386   | 1 | LocalCorticosteroids | OTU4473201 |
| 407   | 1 | LocalCorticosteroids | OTU4474056 |
| 394   | 1 | LocalCorticosteroids | OTU4481323 |
| 399.5 | 1 | LocalCorticosteroids | OTU505749  |
| 413   | 1 | LocalCorticosteroids | OTU511475  |
| 380.5 | 1 | LocalCorticosteroids | OTU610043  |
| 395   | 1 | LocalCorticosteroids | OTU625320  |
| 378   | 1 | LocalCorticosteroids | OTU755148  |
| 388   | 1 | LocalCorticosteroids | OTU761594  |
| 380.5 | 1 | LocalCorticosteroids | OTU819937  |
| 385.5 | 1 | LocalCorticosteroids | OTU820692  |
| 390.5 | 1 | LocalCorticosteroids | OTU912906  |

|            |            |                 |            |
|------------|------------|-----------------|------------|
| 1934,05,01 | 0.91868516 | Antibiotics     | OTU819937  |
| 115        | 0.91868516 | Antibiotics     | OTU837884  |
| 1934,05,01 | 0.91868516 | Antibiotics     | OTU851668  |
| 31         | 0.91868516 | Antibiotics     | OTU851917  |
| 92         | 0.91868516 | Antibiotics     | OTU851925  |
| 40         | 0.91868516 | Antibiotics     | OTU912906  |
| 15         | 0.91868516 | Antibiotics     | OTU912997  |
| 82         | 0.91868516 | Antibiotics     | OTU939571  |
| 1626       | 0.91868516 | VitaminDanalogs | OTU1004369 |
| 2055       | 0.91868516 | VitaminDanalogs | OTU1036883 |
| 1998,05,01 | 0.91868516 | VitaminDanalogs | OTU103810  |
| 2066       | 0.91868516 | VitaminDanalogs | OTU1096610 |
| 1852       | 0.91868516 | VitaminDanalogs | OTU1107940 |
| 1912,05,01 | 0.91868516 | VitaminDanalogs | OTU1131523 |
| 1664       | 0.91868516 | VitaminDanalogs | OTU14278   |
| 1959       | 0.91868516 | VitaminDanalogs | OTU205025  |
| 1534       | 0.91868516 | VitaminDanalogs | OTU25259   |
| 2019       | 0.91868516 | VitaminDanalogs | OTU25478   |
| 1980       | 0.91868516 | VitaminDanalogs | OTU279980  |
| 1648       | 0.91868516 | VitaminDanalogs | OTU282360  |
| 2043       | 0.91868516 | VitaminDanalogs | OTU370134  |
| 1578       | 0.91868516 | VitaminDanalogs | OTU403853  |
| 1638       | 0.91868516 | VitaminDanalogs | OTU4047452 |
| 1571       | 0.91868516 | VitaminDanalogs | OTU4294554 |
| 1582       | 0.91868516 | VitaminDanalogs | OTU4303697 |
| 1939,05,01 | 0.91868516 | VitaminDanalogs | OTU4306540 |
| 1895       | 0.91868516 | VitaminDanalogs | OTU4309323 |
| 1590       | 0.91868516 | VitaminDanalogs | OTU4317476 |
| 1627       | 0.91868516 | VitaminDanalogs | OTU4318084 |
| 1880       | 0.91868516 | VitaminDanalogs | OTU4327286 |
| 2019,05,01 | 0.91868516 | VitaminDanalogs | OTU4346894 |
| 1659       | 0.91868516 | VitaminDanalogs | OTU4349522 |
| 1980       | 0.91868516 | VitaminDanalogs | OTU4349859 |
| 1663.5     | 0.91868516 | VitaminDanalogs | OTU4353642 |
| 1648       | 0.91868516 | VitaminDanalogs | OTU4354809 |
| 1933,05,01 | 0.91868516 | VitaminDanalogs | OTU4369229 |
| 1600       | 0.91868516 | VitaminDanalogs | OTU4408996 |
| 1983       | 0.91868516 | VitaminDanalogs | OTU4422718 |
| 1954       | 0.91868516 | VitaminDanalogs | OTU4439089 |
| 1570       | 0.91868516 | VitaminDanalogs | OTU4440643 |
| 1962,05,01 | 0.91868516 | VitaminDanalogs | OTU4456068 |
| 1891       | 0.91868516 | VitaminDanalogs | OTU4460228 |
| 1905,05,01 | 0.91868516 | VitaminDanalogs | OTU4468125 |
| 1622       | 0.91868516 | VitaminDanalogs | OTU4473201 |
| 1910       | 0.91868516 | VitaminDanalogs | OTU4473664 |
| 1569.5     | 0.91868516 | VitaminDanalogs | OTU4480063 |
| 1470.5     | 0.91868516 | VitaminDanalogs | OTU496787  |
| 1898.5     | 0.91868516 | VitaminDanalogs | OTU511475  |
| 2050       | 0.91868516 | VitaminDanalogs | OTU610043  |
| 1529       | 0.91868516 | VitaminDanalogs | OTU837884  |
| 1994       | 0.91868516 | VitaminDanalogs | OTU851668  |
| 1958       | 0.91868516 | VitaminDanalogs | OTU851925  |
| 1971       | 0.91868516 | VitaminDanalogs | OTU940083  |
| 1880.5     | 0.91868516 | VitaminDanalogs | OTU995817  |
| 1021       | 0.91868516 | TAR.topical.    | OTU1003210 |
| 987        | 0.91868516 | TAR.topical.    | OTU1081372 |
| 1007.5     | 0.91868516 | TAR.topical.    | OTU1096610 |
| 1055.5     | 0.91868516 | TAR.topical.    | OTU1131523 |
| 1020       | 0.91868516 | TAR.topical.    | OTU13445   |
| 1243       | 0.91868516 | TAR.topical.    | OTU164003  |
| 1046.5     | 0.91868516 | TAR.topical.    | OTU20360   |
| 1241       | 0.91868516 | TAR.topical.    | OTU205025  |
| 1226       | 0.91868516 | TAR.topical.    | OTU25259   |
| 959.5      | 0.91868516 | TAR.topical.    | OTU285376  |
| 1346.5     | 0.91868516 | TAR.topical.    | OTU2901965 |
| 1255       | 0.91868516 | TAR.topical.    | OTU3208510 |
| 1060       | 0.91868516 | TAR.topical.    | OTU362390  |
| 1008.5     | 0.91868516 | TAR.topical.    | OTU370309  |
| 1057       | 0.91868516 | TAR.topical.    | OTU4299324 |
| 1004       | 0.91868516 | TAR.topical.    | OTU4301457 |
| 1338.5     | 0.91868516 | TAR.topical.    | OTU4306540 |
| 1254       | 0.91868516 | TAR.topical.    | OTU4309323 |
| 1265.5     | 0.91868516 | TAR.topical.    | OTU4318084 |
| 1014.5     | 0.91868516 | TAR.topical.    | OTU4327286 |
| 994        | 0.91868516 | TAR.topical.    | OTU4327300 |
| 1053.5     | 0.91868516 | TAR.topical.    | OTU4349519 |
| 947        | 0.91868516 | TAR.topical.    | OTU4349522 |
| 1269       | 0.91868516 | TAR.topical.    | OTU4349859 |
| 1244.5     | 0.91868516 | TAR.topical.    | OTU4350124 |
| 1231       | 0.91868516 | TAR.topical.    | OTU4353642 |
| 1275       | 0.91868516 | TAR.topical.    | OTU4354809 |
| 1014.5     | 0.91868516 | TAR.topical.    | OTU4369229 |

|       |   |                              |            |
|-------|---|------------------------------|------------|
| 410.5 | 1 | LocalCorticosteroids         | OTU912997  |
| 415   | 1 | LocalCorticosteroids         | OTU987144  |
| 813   | 1 | Phototherapy                 | OTU1036883 |
| 880   | 1 | Phototherapy                 | OTU103810  |
| 824   | 1 | Phototherapy                 | OTU1081372 |
| 826   | 1 | Phototherapy                 | OTU1096610 |
| 840   | 1 | Phototherapy                 | OTU1107940 |
| 844   | 1 | Phototherapy                 | OTU1131523 |
| 861   | 1 | Phototherapy                 | OTU114999  |
| 842   | 1 | Phototherapy                 | OTU164003  |
| 830   | 1 | Phototherapy                 | OTU205025  |
| 840   | 1 | Phototherapy                 | OTU247720  |
| 819   | 1 | Phototherapy                 | OTU279980  |
| 867.5 | 1 | Phototherapy                 | OTU282360  |
| 807   | 1 | Phototherapy                 | OTU285376  |
| 812   | 1 | Phototherapy                 | OTU3208510 |
| 892.5 | 1 | Phototherapy                 | OTU362390  |
| 878   | 1 | Phototherapy                 | OTU370134  |
| 793   | 1 | Phototherapy                 | OTU370309  |
| 816   | 1 | Phototherapy                 | OTU378096  |
| 870   | 1 | Phototherapy                 | OTU4021335 |
| 794   | 1 | Phototherapy                 | OTU4047452 |
| 840   | 1 | Phototherapy                 | OTU4294554 |
| 776   | 1 | Phototherapy                 | OTU4301457 |
| 829   | 1 | Phototherapy                 | OTU4303697 |
| 805.5 | 1 | Phototherapy                 | OTU4318084 |
| 853   | 1 | Phototherapy                 | OTU4327300 |
| 793   | 1 | Phototherapy                 | OTU4346894 |
| 876   | 1 | Phototherapy                 | OTU4349522 |
| 861   | 1 | Phototherapy                 | OTU4353642 |
| 834   | 1 | Phototherapy                 | OTU4408996 |
| 818   | 1 | Phototherapy                 | OTU4421536 |
| 871   | 1 | Phototherapy                 | OTU4422718 |
| 856   | 1 | Phototherapy                 | OTU4439089 |
| 787   | 1 | Phototherapy                 | OTU4449324 |
| 788   | 1 | Phototherapy                 | OTU4468125 |
| 802.5 | 1 | Phototherapy                 | OTU4471315 |
| 837   | 1 | Phototherapy                 | OTU4474056 |
| 856   | 1 | Phototherapy                 | OTU4476950 |
| 847   | 1 | Phototherapy                 | OTU4482598 |
| 856   | 1 | Phototherapy                 | OTU565753  |
| 882.5 | 1 | Phototherapy                 | OTU625320  |
| 835   | 1 | Phototherapy                 | OTU654307  |
| 815.5 | 1 | Phototherapy                 | OTU761594  |
| 852   | 1 | Phototherapy                 | OTU819937  |
| 846   | 1 | Phototherapy                 | OTU820692  |
| 847   | 1 | Phototherapy                 | OTU912906  |
| 839.5 | 1 | Phototherapy                 | OTU912997  |
| 870.5 | 1 | Phototherapy                 | OTU939571  |
| 801.5 | 1 | Topicalcalcineurininhibitors | OTU1003210 |
| 812   | 1 | Topicalcalcineurininhibitors | OTU1036883 |
| 811   | 1 | Topicalcalcineurininhibitors | OTU1081372 |
| 876.5 | 1 | Topicalcalcineurininhibitors | OTU1107940 |
| 810   | 1 | Topicalcalcineurininhibitors | OTU114999  |
| 842   | 1 | Topicalcalcineurininhibitors | OTU25259   |
| 832   | 1 | Topicalcalcineurininhibitors | OTU282360  |
| 869   | 1 | Topicalcalcineurininhibitors | OTU370134  |
| 860   | 1 | Topicalcalcineurininhibitors | OTU370309  |
| 796   | 1 | Topicalcalcineurininhibitors | OTU378096  |
| 784   | 1 | Topicalcalcineurininhibitors | OTU4047452 |
| 830   | 1 | Topicalcalcineurininhibitors | OTU4303697 |
| 806   | 1 | Topicalcalcineurininhibitors | OTU4327300 |
| 834.5 | 1 | Topicalcalcineurininhibitors | OTU4348347 |
| 885   | 1 | Topicalcalcineurininhibitors | OTU4350124 |
| 896   | 1 | Topicalcalcineurininhibitors | OTU4354809 |
| 773   | 1 | Topicalcalcineurininhibitors | OTU4449324 |
| 836   | 1 | Topicalcalcineurininhibitors | OTU4473201 |
| 832   | 1 | Topicalcalcineurininhibitors | OTU4473664 |
| 806.5 | 1 | Topicalcalcineurininhibitors | OTU4476950 |
| 817.5 | 1 | Topicalcalcineurininhibitors | OTU4481323 |
| 805   | 1 | Topicalcalcineurininhibitors | OTU565753  |
| 835.5 | 1 | Topicalcalcineurininhibitors | OTU610043  |
| 824   | 1 | Topicalcalcineurininhibitors | OTU625320  |
| 808   | 1 | Topicalcalcineurininhibitors | OTU654307  |
| 823   | 1 | Topicalcalcineurininhibitors | OTU755148  |
| 877.5 | 1 | Topicalcalcineurininhibitors | OTU820692  |
| 806   | 1 | Topicalcalcineurininhibitors | OTU851925  |
| 789.5 | 1 | Topicalcalcineurininhibitors | OTU883806  |
| 829   | 1 | Topicalcalcineurininhibitors | OTU912906  |
| 882   | 1 | Topicalcalcineurininhibitors | OTU987144  |
| 750.5 | 1 | SystemicCorticosteroids      | OTU103810  |
| 691   | 1 | SystemicCorticosteroids      | OTU1107940 |

|        |            |                         |            |
|--------|------------|-------------------------|------------|
| 1044   | 0.91868516 | TAR.topical.            | OTU4411187 |
| 1053   | 0.91868516 | TAR.topical.            | OTU4422718 |
| 922    | 0.91868516 | TAR.topical.            | OTU4446521 |
| 1384.5 | 0.91868516 | TAR.topical.            | OTU4456068 |
| 1026   | 0.91868516 | TAR.topical.            | OTU4476950 |
| 1040   | 0.91868516 | TAR.topical.            | OTU4480063 |
| 974    | 0.91868516 | TAR.topical.            | OTU4481323 |
| 1038   | 0.91868516 | TAR.topical.            | OTU565753  |
| 1316   | 0.91868516 | TAR.topical.            | OTU74351   |
| 962    | 0.91868516 | TAR.topical.            | OTU820692  |
| 1269.5 | 0.91868516 | TAR.topical.            | OTU837884  |
| 965    | 0.91868516 | TAR.topical.            | OTU851917  |
| 1292   | 0.91868516 | TAR.topical.            | OTU851925  |
| 1031   | 0.91868516 | TAR.topical.            | OTU912906  |
| 1337   | 0.91868516 | TAR.topical.            | OTU987144  |
| 903.5  | 0.91868516 | TAR.topical.            | OTU995817  |
| 1205   | 0.91868516 | Photochemotherapy       | OTU1003210 |
| 1209   | 0.91868516 | Photochemotherapy       | OTU1004369 |
| 964    | 0.91868516 | Photochemotherapy       | OTU1081372 |
| 1205   | 0.91868516 | Photochemotherapy       | OTU1096610 |
| 1265   | 0.91868516 | Photochemotherapy       | OTU25478   |
| 1189   | 0.91868516 | Photochemotherapy       | OTU279980  |
| 1243.5 | 0.91868516 | Photochemotherapy       | OTU285376  |
| 947    | 0.91868516 | Photochemotherapy       | OTU360483  |
| 969.5  | 0.91868516 | Photochemotherapy       | OTU370134  |
| 1009   | 0.91868516 | Photochemotherapy       | OTU378096  |
| 1042   | 0.91868516 | Photochemotherapy       | OTU3841245 |
| 1215   | 0.91868516 | Photochemotherapy       | OTU4303697 |
| 1240.5 | 0.91868516 | Photochemotherapy       | OTU4306540 |
| 1270   | 0.91868516 | Photochemotherapy       | OTU4309323 |
| 1306   | 0.91868516 | Photochemotherapy       | OTU4317476 |
| 974.5  | 0.91868516 | Photochemotherapy       | OTU4346894 |
| 918    | 0.91868516 | Photochemotherapy       | OTU4348347 |
| 1005   | 0.91868516 | Photochemotherapy       | OTU4354809 |
| 1252   | 0.91868516 | Photochemotherapy       | OTU4369229 |
| 1313.5 | 0.91868516 | Photochemotherapy       | OTU4411187 |
| 1253   | 0.91868516 | Photochemotherapy       | OTU4422718 |
| 1307   | 0.91868516 | Photochemotherapy       | OTU4439089 |
| 1005   | 0.91868516 | Photochemotherapy       | OTU4449324 |
| 1000   | 0.91868516 | Photochemotherapy       | OTU4456068 |
| 1244.5 | 0.91868516 | Photochemotherapy       | OTU4468125 |
| 1213   | 0.91868516 | Photochemotherapy       | OTU4471315 |
| 1222   | 0.91868516 | Photochemotherapy       | OTU4473664 |
| 1259   | 0.91868516 | Photochemotherapy       | OTU4481323 |
| 1238   | 0.91868516 | Photochemotherapy       | OTU565753  |
| 1209   | 0.91868516 | Photochemotherapy       | OTU654307  |
| 1207   | 0.91868516 | Photochemotherapy       | OTU74351   |
| 1187   | 0.91868516 | Photochemotherapy       | OTU761594  |
| 1279.5 | 0.91868516 | Photochemotherapy       | OTU851668  |
| 1222   | 0.91868516 | Photochemotherapy       | OTU912906  |
| 1200   | 0.91868516 | Photochemotherapy       | OTU912997  |
| 1290   | 0.91868516 | Photochemotherapy       | OTU940083  |
| 1226   | 0.91868516 | Photochemotherapy       | OTU987144  |
| 289    | 0.91868516 | SystemicCorticosteroids | OTU1004369 |
| 288    | 0.91868516 | SystemicCorticosteroids | OTU1036883 |
| 293    | 0.91868516 | SystemicCorticosteroids | OTU103810  |
| 157.5  | 0.91868516 | SystemicCorticosteroids | OTU1096610 |
| 164    | 0.91868516 | SystemicCorticosteroids | OTU13445   |
| 327    | 0.91868516 | SystemicCorticosteroids | OTU205025  |
| 329    | 0.91868516 | SystemicCorticosteroids | OTU2110555 |
| 186.5  | 0.91868516 | SystemicCorticosteroids | OTU247720  |
| 186    | 0.91868516 | SystemicCorticosteroids | OTU279980  |
| 274.5  | 0.91868516 | SystemicCorticosteroids | OTU2901965 |
| 175.5  | 0.91868516 | SystemicCorticosteroids | OTU370134  |
| 174.5  | 0.91868516 | SystemicCorticosteroids | OTU370309  |
| 188    | 0.91868516 | SystemicCorticosteroids | OTU3841245 |
| 285    | 0.91868516 | SystemicCorticosteroids | OTU4021335 |
| 143    | 0.91868516 | SystemicCorticosteroids | OTU403853  |
| 272    | 0.91868516 | SystemicCorticosteroids | OTU4047452 |
| 154    | 0.91868516 | SystemicCorticosteroids | OTU4299324 |
| 177    | 0.91868516 | SystemicCorticosteroids | OTU4301457 |
| 179.5  | 0.91868516 | SystemicCorticosteroids | OTU4306540 |
| 293    | 0.91868516 | SystemicCorticosteroids | OTU4309323 |
| 298    | 0.91868516 | SystemicCorticosteroids | OTU4317476 |
| 285    | 0.91868516 | SystemicCorticosteroids | OTU4318084 |
| 301.5  | 0.91868516 | SystemicCorticosteroids | OTU4327286 |
| 172    | 0.91868516 | SystemicCorticosteroids | OTU4348347 |
| 280    | 0.91868516 | SystemicCorticosteroids | OTU4349522 |
| 294    | 0.91868516 | SystemicCorticosteroids | OTU4349859 |
| 126    | 0.91868516 | SystemicCorticosteroids | OTU4421536 |
| 134    | 0.91868516 | SystemicCorticosteroids | OTU4439089 |
| 162.5  | 0.91868516 | SystemicCorticosteroids | OTU4440643 |

|       |   |                         |            |
|-------|---|-------------------------|------------|
| 728   | 1 | SystemicCorticosteroids | OTU164003  |
| 699   | 1 | SystemicCorticosteroids | OTU20360   |
| 693   | 1 | SystemicCorticosteroids | OTU2110555 |
| 715.5 | 1 | SystemicCorticosteroids | OTU247720  |
| 727   | 1 | SystemicCorticosteroids | OTU25259   |
| 651   | 1 | SystemicCorticosteroids | OTU285376  |
| 746.5 | 1 | SystemicCorticosteroids | OTU2901965 |
| 700.5 | 1 | SystemicCorticosteroids | OTU3208510 |
| 754.5 | 1 | SystemicCorticosteroids | OTU362390  |
| 706   | 1 | SystemicCorticosteroids | OTU370134  |
| 672   | 1 | SystemicCorticosteroids | OTU4021335 |
| 741   | 1 | SystemicCorticosteroids | OTU4047452 |
| 679   | 1 | SystemicCorticosteroids | OTU4301457 |
| 699   | 1 | SystemicCorticosteroids | OTU4303697 |
| 695.5 | 1 | SystemicCorticosteroids | OTU4317476 |
| 717   | 1 | SystemicCorticosteroids | OTU4318084 |
| 675.5 | 1 | SystemicCorticosteroids | OTU4327286 |
| 708.5 | 1 | SystemicCorticosteroids | OTU4408996 |
| 661   | 1 | SystemicCorticosteroids | OTU4349519 |
| 684.5 | 1 | SystemicCorticosteroids | OTU4349522 |
| 706.5 | 1 | SystemicCorticosteroids | OTU4350124 |
| 725.5 | 1 | SystemicCorticosteroids | OTU4369229 |
| 674   | 1 | SystemicCorticosteroids | OTU4408996 |
| 672   | 1 | SystemicCorticosteroids | OTU4421536 |
| 747   | 1 | SystemicCorticosteroids | OTU4422718 |
| 755   | 1 | SystemicCorticosteroids | OTU4449324 |
| 677   | 1 | SystemicCorticosteroids | OTU4456068 |
| 708   | 1 | SystemicCorticosteroids | OTU4460228 |
| 703   | 1 | SystemicCorticosteroids | OTU4467218 |
| 722   | 1 | SystemicCorticosteroids | OTU4471315 |
| 720.5 | 1 | SystemicCorticosteroids | OTU4473664 |
| 716.5 | 1 | SystemicCorticosteroids | OTU4481323 |
| 674   | 1 | SystemicCorticosteroids | OTU496787  |
| 678   | 1 | SystemicCorticosteroids | OTU505749  |
| 696   | 1 | SystemicCorticosteroids | OTU565753  |
| 731   | 1 | SystemicCorticosteroids | OTU610043  |
| 675   | 1 | SystemicCorticosteroids | OTU625320  |
| 749   | 1 | SystemicCorticosteroids | OTU654307  |
| 694.5 | 1 | SystemicCorticosteroids | OTU74351   |
| 673   | 1 | SystemicCorticosteroids | OTU755148  |
| 755   | 1 | SystemicCorticosteroids | OTU761594  |
| 704   | 1 | SystemicCorticosteroids | OTU819937  |
| 682.5 | 1 | SystemicCorticosteroids | OTU820692  |
| 692   | 1 | SystemicCorticosteroids | OTU851668  |
| 678   | 1 | SystemicCorticosteroids | OTU883806  |
| 672.5 | 1 | SystemicCorticosteroids | OTU912906  |
| 714.5 | 1 | SystemicCorticosteroids | OTU939571  |
| 670.5 | 1 | SystemicCorticosteroids | OTU940083  |
| 663   | 1 | SystemicCorticosteroids | OTU995817  |
| 387.5 | 1 | Cyclosporin             | OTU1003210 |
| 422.5 | 1 | Cyclosporin             | OTU103810  |
| 423.5 | 1 | Cyclosporin             | OTU1107940 |
| 410   | 1 | Cyclosporin             | OTU1131523 |
| 446   | 1 | Cyclosporin             | OTU14278   |
| 400   | 1 | Cyclosporin             | OTU20360   |
| 386.5 | 1 | Cyclosporin             | OTU282360  |
| 402.5 | 1 | Cyclosporin             | OTU3208510 |
| 422   | 1 | Cyclosporin             | OTU360483  |
| 433.5 | 1 | Cyclosporin             | OTU362390  |
| 447   | 1 | Cyclosporin             | OTU370134  |
| 433   | 1 | Cyclosporin             | OTU3841245 |
| 379   | 1 | Cyclosporin             | OTU4047452 |
| 424   | 1 | Cyclosporin             | OTU4301457 |
| 439   | 1 | Cyclosporin             | OTU4306540 |
| 465   | 1 | Cyclosporin             | OTU4317476 |
| 427   | 1 | Cyclosporin             | OTU4346894 |
| 438   | 1 | Cyclosporin             | OTU4349522 |
| 387.5 | 1 | Cyclosporin             | OTU4349859 |
| 457   | 1 | Cyclosporin             | OTU4408996 |
| 459   | 1 | Cyclosporin             | OTU4411187 |
| 432   | 1 | Cyclosporin             | OTU4421536 |
| 434   | 1 | Cyclosporin             | OTU4449324 |
| 464.5 | 1 | Cyclosporin             | OTU4456068 |
| 465.5 | 1 | Cyclosporin             | OTU4467218 |
| 443   | 1 | Cyclosporin             | OTU4473201 |
| 399.5 | 1 | Cyclosporin             | OTU496787  |
| 422   | 1 | Cyclosporin             | OTU505749  |
| 421   | 1 | Cyclosporin             | OTU511475  |
| 405.5 | 1 | Cyclosporin             | OTU610043  |
| 400.5 | 1 | Cyclosporin             | OTU74351   |
| 434   | 1 | Cyclosporin             | OTU819937  |
| 432   | 1 | Cyclosporin             | OTU820692  |

|        |            |                         |            |
|--------|------------|-------------------------|------------|
| 126    | 0.91868516 | SystemicCorticosteroids | OTU4446521 |
| 286    | 0.91868516 | SystemicCorticosteroids | OTU4449324 |
| 161    | 0.91868516 | SystemicCorticosteroids | OTU4456068 |
| 130    | 0.91868516 | SystemicCorticosteroids | OTU4460228 |
| 291    | 0.91868516 | SystemicCorticosteroids | OTU4467218 |
| 271    | 0.91868516 | SystemicCorticosteroids | OTU4473201 |
| 297.5  | 0.91868516 | SystemicCorticosteroids | OTU4476950 |
| 122    | 0.91868516 | SystemicCorticosteroids | OTU4480063 |
| 186.5  | 0.91868516 | SystemicCorticosteroids | OTU496787  |
| 166    | 0.91868516 | SystemicCorticosteroids | OTU505749  |
| 171.5  | 0.91868516 | SystemicCorticosteroids | OTU610043  |
| 134    | 0.91868516 | SystemicCorticosteroids | OTU625320  |
| 154    | 0.91868516 | SystemicCorticosteroids | OTU654307  |
| 138    | 0.91868516 | SystemicCorticosteroids | OTU74351   |
| 170    | 0.91868516 | SystemicCorticosteroids | OTU755148  |
| 193.5  | 0.91868516 | SystemicCorticosteroids | OTU761594  |
| 132    | 0.91868516 | SystemicCorticosteroids | OTU851668  |
| 179.5  | 0.91868516 | SystemicCorticosteroids | OTU939571  |
| 269    | 0.91868516 | SystemicCorticosteroids | OTU987144  |
| 1475   | 0.91868516 | Phototherapy            | OTU1003210 |
| 1490   | 0.91868516 | Phototherapy            | OTU1036883 |
| 1497.5 | 0.91868516 | Phototherapy            | OTU103810  |
| 1474   | 0.91868516 | Phototherapy            | OTU1081372 |
| 1819.5 | 0.91868516 | Phototherapy            | OTU1096610 |
| 1820   | 0.91868516 | Phototherapy            | OTU1131523 |
| 1793.5 | 0.91868516 | Phototherapy            | OTU20360   |
| 1472   | 0.91868516 | Phototherapy            | OTU205025  |
| 1773   | 0.91868516 | Phototherapy            | OTU2110555 |
| 1819   | 0.91868516 | Phototherapy            | OTU247720  |
| 1792.5 | 0.91868516 | Phototherapy            | OTU2901965 |
| 1738   | 0.91868516 | Phototherapy            | OTU362390  |
| 1419   | 0.91868516 | Phototherapy            | OTU4294554 |
| 1784   | 0.91868516 | Phototherapy            | OTU4299324 |
| 1775.5 | 0.91868516 | Phototherapy            | OTU4309323 |
| 1716   | 0.91868516 | Phototherapy            | OTU4317476 |
| 1805.5 | 0.91868516 | Phototherapy            | OTU4327286 |
| 1851.5 | 0.91868516 | Phototherapy            | OTU4349519 |
| 1815.5 | 0.91868516 | Phototherapy            | OTU4349522 |
| 1875   | 0.91868516 | Phototherapy            | OTU4369229 |
| 1463   | 0.91868516 | Phototherapy            | OTU4408996 |
| 1702   | 0.91868516 | Phototherapy            | OTU4411187 |
| 1389   | 0.91868516 | Phototherapy            | OTU4421536 |
| 1738   | 0.91868516 | Phototherapy            | OTU4446521 |
| 1732   | 0.91868516 | Phototherapy            | OTU4471315 |
| 1749   | 0.91868516 | Phototherapy            | OTU4473664 |
| 1711   | 0.91868516 | Phototherapy            | OTU4480063 |
| 1840   | 0.91868516 | Phototherapy            | OTU625320  |
| 1466   | 0.91868516 | Phototherapy            | OTU654307  |
| 1757   | 0.91868516 | Phototherapy            | OTU74351   |
| 1460   | 0.91868516 | Phototherapy            | OTU761594  |
| 1799   | 0.91868516 | Phototherapy            | OTU819937  |
| 1439   | 0.91868516 | Phototherapy            | OTU820692  |
| 1444   | 0.91868516 | Phototherapy            | OTU837884  |
| 1494   | 0.91868516 | Phototherapy            | OTU851925  |
| 1472   | 0.91868516 | Phototherapy            | OTU883806  |
| 1487   | 0.91868516 | Phototherapy            | OTU912906  |
| 1789   | 0.91868516 | Phototherapy            | OTU987144  |
| 420    | 0.91868516 | Cyclosporin             | OTU1003210 |
| 569    | 0.91868516 | Cyclosporin             | OTU1004369 |
| 652    | 0.91868516 | Cyclosporin             | OTU1036883 |
| 573.5  | 0.91868516 | Cyclosporin             | OTU103810  |
| 433    | 0.91868516 | Cyclosporin             | OTU1081372 |
| 570    | 0.91868516 | Cyclosporin             | OTU1096610 |
| 550    | 0.91868516 | Cyclosporin             | OTU1107940 |
| 620.5  | 0.91868516 | Cyclosporin             | OTU1131523 |
| 422    | 0.91868516 | Cyclosporin             | OTU14278   |
| 634    | 0.91868516 | Cyclosporin             | OTU205025  |
| 586    | 0.91868516 | Cyclosporin             | OTU247720  |
| 555    | 0.91868516 | Cyclosporin             | OTU25259   |
| 587    | 0.91868516 | Cyclosporin             | OTU25478   |
| 412    | 0.91868516 | Cyclosporin             | OTU279980  |
| 549.5  | 0.91868516 | Cyclosporin             | OTU362390  |
| 396.5  | 0.91868516 | Cyclosporin             | OTU370309  |
| 625    | 0.91868516 | Cyclosporin             | OTU378096  |
| 549    | 0.91868516 | Cyclosporin             | OTU4294554 |
| 560    | 0.91868516 | Cyclosporin             | OTU4299324 |
| 380.5  | 0.91868516 | Cyclosporin             | OTU4301457 |
| 402    | 0.91868516 | Cyclosporin             | OTU4306540 |
| 586.5  | 0.91868516 | Cyclosporin             | OTU4318084 |
| 577    | 0.91868516 | Cyclosporin             | OTU4327286 |
| 434    | 0.91868516 | Cyclosporin             | OTU4327300 |
| 370    | 0.91868516 | Cyclosporin             | OTU4346894 |



|       |   |              |            |
|-------|---|--------------|------------|
| 421   | 1 | Cyclosporin  | OTU837884  |
| 409   | 1 | Cyclosporin  | OTU851917  |
| 445   | 1 | Cyclosporin  | OTU851925  |
| 409   | 1 | Cyclosporin  | OTU883806  |
| 399.5 | 1 | Cyclosporin  | OTU912906  |
| 462   | 1 | Cyclosporin  | OTU939571  |
| 376   | 1 | Antibiotics  | OTU1004369 |
| 375   | 1 | Antibiotics  | OTU1036883 |
| 362   | 1 | Antibiotics  | OTU1096610 |
| 365   | 1 | Antibiotics  | OTU114999  |
| 378   | 1 | Antibiotics  | OTU14278   |
| 403   | 1 | Antibiotics  | OTU164003  |
| 426   | 1 | Antibiotics  | OTU20360   |
| 412   | 1 | Antibiotics  | OTU205025  |
| 385   | 1 | Antibiotics  | OTU247720  |
| 369   | 1 | Antibiotics  | OTU25259   |
| 360.5 | 1 | Antibiotics  | OTU25478   |
| 390   | 1 | Antibiotics  | OTU279980  |
| 405.5 | 1 | Antibiotics  | OTU282360  |
| 343.5 | 1 | Antibiotics  | OTU285376  |
| 402.5 | 1 | Antibiotics  | OTU3208510 |
| 394.5 | 1 | Antibiotics  | OTU360483  |
| 415   | 1 | Antibiotics  | OTU362390  |
| 375   | 1 | Antibiotics  | OTU370309  |
| 391   | 1 | Antibiotics  | OTU3841245 |
| 364   | 1 | Antibiotics  | OTU4047452 |
| 403.5 | 1 | Antibiotics  | OTU4317476 |
| 379.5 | 1 | Antibiotics  | OTU4318084 |
| 411.5 | 1 | Antibiotics  | OTU4348347 |
| 406.5 | 1 | Antibiotics  | OTU4349522 |
| 419.5 | 1 | Antibiotics  | OTU4350124 |
| 376   | 1 | Antibiotics  | OTU4353642 |
| 411.5 | 1 | Antibiotics  | OTU4408996 |
| 413   | 1 | Antibiotics  | OTU4421536 |
| 344   | 1 | Antibiotics  | OTU4422405 |
| 401   | 1 | Antibiotics  | OTU4446521 |
| 436   | 1 | Antibiotics  | OTU4449324 |
| 424.5 | 1 | Antibiotics  | OTU4456068 |
| 417   | 1 | Antibiotics  | OTU4460228 |
| 358   | 1 | Antibiotics  | OTU4468125 |
| 360   | 1 | Antibiotics  | OTU4473201 |
| 420.5 | 1 | Antibiotics  | OTU4473664 |
| 365.5 | 1 | Antibiotics  | OTU4476950 |
| 421   | 1 | Antibiotics  | OTU4480063 |
| 406.5 | 1 | Antibiotics  | OTU4481323 |
| 381.5 | 1 | Antibiotics  | OTU505749  |
| 410.5 | 1 | Antibiotics  | OTU610043  |
| 390   | 1 | Antibiotics  | OTU625320  |
| 421   | 1 | Antibiotics  | OTU654307  |
| 356.5 | 1 | Antibiotics  | OTU761594  |
| 392   | 1 | Antibiotics  | OTU851668  |
| 395   | 1 | Antibiotics  | OTU851917  |
| 368   | 1 | Antibiotics  | OTU851925  |
| 410   | 1 | Antibiotics  | OTU883806  |
| 369.5 | 1 | Antibiotics  | OTU912997  |
| 412.5 | 1 | Antibiotics  | OTU939571  |
| 102   | 1 | Methotrexate | OTU1003210 |
| 125   | 1 | Methotrexate | OTU1004369 |
| 96    | 1 | Methotrexate | OTU1036883 |
| 130   | 1 | Methotrexate | OTU1081372 |
| 142   | 1 | Methotrexate | OTU1096610 |
| 130.5 | 1 | Methotrexate | OTU1107940 |
| 102   | 1 | Methotrexate | OTU1131523 |
| 104   | 1 | Methotrexate | OTU114999  |
| 114   | 1 | Methotrexate | OTU13445   |
| 119   | 1 | Methotrexate | OTU20360   |
| 111   | 1 | Methotrexate | OTU247720  |
| 116   | 1 | Methotrexate | OTU25259   |
| 114   | 1 | Methotrexate | OTU25478   |
| 129   | 1 | Methotrexate | OTU279980  |
| 126   | 1 | Methotrexate | OTU282360  |
| 129   | 1 | Methotrexate | OTU285376  |
| 108   | 1 | Methotrexate | OTU3208510 |
| 114   | 1 | Methotrexate | OTU362390  |
| 109   | 1 | Methotrexate | OTU370309  |
| 116   | 1 | Methotrexate | OTU3841245 |
| 123   | 1 | Methotrexate | OTU4301457 |
| 104   | 1 | Methotrexate | OTU4306540 |
| 131   | 1 | Methotrexate | OTU4318084 |
| 118   | 1 | Methotrexate | OTU4327300 |
| 104   | 1 | Methotrexate | OTU4348347 |
| 115   | 1 | Methotrexate | OTU4349519 |

|            |            |                              |            |
|------------|------------|------------------------------|------------|
| 432.5      | 0.91868516 | Cyclosporin                  | OTU4349522 |
| 611.5      | 0.91868516 | Cyclosporin                  | OTU4349859 |
| 560        | 0.91868516 | Cyclosporin                  | OTU4353642 |
| 598        | 0.91868516 | Cyclosporin                  | OTU4422405 |
| 338        | 0.91868516 | Cyclosporin                  | OTU4422718 |
| 404        | 0.91868516 | Cyclosporin                  | OTU4446521 |
| 579        | 0.91868516 | Cyclosporin                  | OTU4473664 |
| 407        | 0.91868516 | Cyclosporin                  | OTU4474056 |
| 401        | 0.91868516 | Cyclosporin                  | OTU4481323 |
| 648        | 0.91868516 | Cyclosporin                  | OTU4482598 |
| 404        | 0.91868516 | Cyclosporin                  | OTU505749  |
| 553        | 0.91868516 | Cyclosporin                  | OTU565753  |
| 375        | 0.91868516 | Cyclosporin                  | OTU654307  |
| 364        | 0.91868516 | Cyclosporin                  | OTU74351   |
| 606        | 0.91868516 | Cyclosporin                  | OTU851925  |
| 574        | 0.91868516 | Cyclosporin                  | OTU883806  |
| 427        | 0.91868516 | Cyclosporin                  | OTU912906  |
| 613        | 0.91868516 | Cyclosporin                  | OTU912997  |
| 368        | 0.91868516 | Cyclosporin                  | OTU939571  |
| 594        | 0.91868516 | Cyclosporin                  | OTU940083  |
| 555        | 0.91868516 | Cyclosporin                  | OTU987144  |
| 722        | 0.91868516 | Dithranol.minute             | OTU1081372 |
| 689.5      | 0.91868516 | Dithranol.minute             | OTU1096610 |
| 755.5      | 0.91868516 | Dithranol.minute             | OTU13445   |
| 748        | 0.91868516 | Dithranol.minute             | OTU14278   |
| 970        | 0.91868516 | Dithranol.minute             | OTU205025  |
| 710        | 0.91868516 | Dithranol.minute             | OTU247720  |
| 895.5      | 0.91868516 | Dithranol.minute             | OTU25478   |
| 640        | 0.91868516 | Dithranol.minute             | OTU282360  |
| 692        | 0.91868516 | Dithranol.minute             | OTU3208510 |
| 712        | 0.91868516 | Dithranol.minute             | OTU360483  |
| 653.5      | 0.91868516 | Dithranol.minute             | OTU362390  |
| 912        | 0.91868516 | Dithranol.minute             | OTU370134  |
| 705        | 0.91868516 | Dithranol.minute             | OTU403853  |
| 918.5      | 0.91868516 | Dithranol.minute             | OTU4301457 |
| 923        | 0.91868516 | Dithranol.minute             | OTU4306540 |
| 699.5      | 0.91868516 | Dithranol.minute             | OTU4327286 |
| 731        | 0.91868516 | Dithranol.minute             | OTU4327300 |
| 644        | 0.91868516 | Dithranol.minute             | OTU4349522 |
| 685        | 0.91868516 | Dithranol.minute             | OTU4349859 |
| 715.5      | 0.91868516 | Dithranol.minute             | OTU4350124 |
| 992        | 0.91868516 | Dithranol.minute             | OTU4421536 |
| 690        | 0.91868516 | Dithranol.minute             | OTU4422405 |
| 685        | 0.91868516 | Dithranol.minute             | OTU4422718 |
| 699        | 0.91868516 | Dithranol.minute             | OTU4439089 |
| 714        | 0.91868516 | Dithranol.minute             | OTU4446521 |
| 749        | 0.91868516 | Dithranol.minute             | OTU4460228 |
| 731.5      | 0.91868516 | Dithranol.minute             | OTU4467218 |
| 666        | 0.91868516 | Dithranol.minute             | OTU4471315 |
| 920        | 0.91868516 | Dithranol.minute             | OTU4473664 |
| 929.5      | 0.91868516 | Dithranol.minute             | OTU4480063 |
| 891        | 0.91868516 | Dithranol.minute             | OTU4481323 |
| 975        | 0.91868516 | Dithranol.minute             | OTU4482598 |
| 699.5      | 0.91868516 | Dithranol.minute             | OTU505749  |
| 760.5      | 0.91868516 | Dithranol.minute             | OTU511475  |
| 747        | 0.91868516 | Dithranol.minute             | OTU565753  |
| 657        | 0.91868516 | Dithranol.minute             | OTU625320  |
| 717        | 0.91868516 | Dithranol.minute             | OTU654307  |
| 928        | 0.91868516 | Dithranol.minute             | OTU74351   |
| 677        | 0.91868516 | Dithranol.minute             | OTU755148  |
| 717.5      | 0.91868516 | Dithranol.minute             | OTU851668  |
| 982        | 0.91868516 | Dithranol.minute             | OTU912997  |
| 730        | 0.91868516 | Dithranol.minute             | OTU939571  |
| 704        | 0.91868516 | Dithranol.minute             | OTU940083  |
| 713        | 0.91868516 | Dithranol.minute             | OTU987144  |
| 665.5      | 0.91868516 | Dithranol.minute             | OTU995817  |
| 440        | 0.91986716 | Topicalcalcineurininhibitors | OTU4408996 |
| 1682       | 0.91986716 | Phototherapy                 | OTU1107940 |
| 342        | 0.91996795 | Topicalcalcineurininhibitors | OTU164003  |
| 1941,05,01 | 0.91996795 | Antibiotics                  | OTU378096  |
| 1221       | 0.91996795 | TAR.topical.                 | OTU4408996 |
| 1195.5     | 0.91996795 | Photochemotherapy            | OTU496787  |
| 757        | 0.91996795 | Dithranol.minute             | OTU4473201 |
| 1195       | 0.92200647 | Photochemotherapy            | OTU4349859 |
| 267        | 0.92200647 | SystemicCorticosteroids      | OTU25478   |
| 1178       | 0.92215085 | Methotrexate                 | OTU4353642 |
| 869.5      | 0.92286155 | Retinoids                    | OTU4369229 |
| 38         | 0.92286155 | Antibiotics                  | OTU995817  |
| 194        | 0.92286155 | SystemicCorticosteroids      | OTU4408996 |
| 42         | 0.92365539 | Antibiotics                  | OTU4294554 |
| 193.5      | 0.92365539 | SystemicCorticosteroids      | OTU114999  |
| 345.5      | 0.92492995 | Topicalcalcineurininhibitors | OTU4476950 |

|            |   |              |            |
|------------|---|--------------|------------|
| 100        | 1 | Methotrexate | OTU4349859 |
| 109        | 1 | Methotrexate | OTU4350124 |
| 133        | 1 | Methotrexate | OTU4411187 |
| 128        | 1 | Methotrexate | OTU4422405 |
| 103        | 1 | Methotrexate | OTU4422718 |
| 139        | 1 | Methotrexate | OTU4446521 |
| 134.5      | 1 | Methotrexate | OTU4456068 |
| 109        | 1 | Methotrexate | OTU4460228 |
| 127        | 1 | Methotrexate | OTU4468125 |
| 110        | 1 | Methotrexate | OTU4473664 |
| 128        | 1 | Methotrexate | OTU4474056 |
| 100        | 1 | Methotrexate | OTU4480063 |
| 1997,05,01 | 1 | Methotrexate | OTU4482598 |
| 124        | 1 | Methotrexate | OTU496787  |
| 96         | 1 | Methotrexate | OTU511475  |
| 104        | 1 | Methotrexate | OTU610043  |
| 110        | 1 | Methotrexate | OTU625320  |
| 109        | 1 | Methotrexate | OTU755148  |
| 120        | 1 | Methotrexate | OTU761594  |
| 103        | 1 | Methotrexate | OTU820692  |
| 120        | 1 | Methotrexate | OTU837884  |
| 130.5      | 1 | Methotrexate | OTU851668  |
| 119        | 1 | Methotrexate | OTU851917  |
| 101        | 1 | Methotrexate | OTU851925  |
| 106        | 1 | Methotrexate | OTU912906  |
| 127        | 1 | Methotrexate | OTU939571  |
| 104        | 1 | Methotrexate | OTU940083  |

|            |            |                              |            |
|------------|------------|------------------------------|------------|
| 580        | 0.92492995 | Fumaricacid                  | OTU610043  |
| 584        | 0.92492995 | Fumaricacid                  | OTU761594  |
| 442        | 0.92492995 | Cyclosporin                  | OTU114999  |
| 876        | 0.92496879 | Retinoids                    | OTU370134  |
| 1942,05,01 | 0.92496879 | Antibiotics                  | OTU13445   |
| 1863       | 0.92496879 | VitaminDanalogs              | OTU625320  |
| 264        | 0.92496879 | SystemicCorticosteroids      | OTU362390  |
| 748        | 0.92496879 | Dithranol.minute             | OTU1004369 |
| 1017       | 0.92578655 | Retinoids                    | OTU4411187 |
| 1191.5     | 0.92578655 | Methotrexate                 | OTU837884  |
| 1182       | 0.92578655 | Methotrexate                 | OTU851917  |
| 1131.5     | 0.92578655 | LocalCorticosteroids         | OTU4476950 |
| 1276       | 0.92578655 | LocalCorticosteroids         | OTU851925  |
| 437.5      | 0.92578655 | Topicalcalcineurininhibitors | OTU1131523 |
| 345.5      | 0.92578655 | Topicalcalcineurininhibitors | OTU851668  |
| 577.5      | 0.92578655 | Fumaricacid                  | OTU403853  |
| 79         | 0.92578655 | Antibiotics                  | OTU1004369 |
| 1864       | 0.92578655 | VitaminDanalogs              | OTU1081372 |
| 1851       | 0.92578655 | VitaminDanalogs              | OTU13445   |
| 1026       | 0.92578655 | Photochemotherapy            | OTU4349519 |
| 1020.5     | 0.92578655 | Photochemotherapy            | OTU4480063 |
| 1183       | 0.92578655 | Photochemotherapy            | OTU610043  |
| 1161       | 0.92578655 | Photochemotherapy            | OTU883806  |
| 266.5      | 0.92578655 | SystemicCorticosteroids      | OTU360483  |
| 1499.5     | 0.92578655 | Phototherapy                 | OTU4047452 |
| 1701       | 0.92578655 | Phototherapy                 | OTU4346894 |
| 547        | 0.92578655 | Cyclosporin                  | OTU282360  |
| 447.5      | 0.92578655 | Cyclosporin                  | OTU4350124 |
| 756        | 0.92578655 | Dithranol.minute             | OTU4317476 |
| 754        | 0.92578655 | Dithranol.minute             | OTU4474056 |
| 446        | 0.92698449 | Cyclosporin                  | OTU4408996 |
| 355        | 0.9285878  | Topicalcalcineurininhibitors | OTU511475  |
| 699        | 0.9285878  | Fumaricacid                  | OTU164003  |
| 44         | 0.9285878  | Antibiotics                  | OTU565753  |
| 76         | 0.9285878  | Antibiotics                  | OTU940083  |
| 1070       | 0.9285878  | TAR.topical.                 | OTU4473201 |
| 1178       | 0.9285878  | Photochemotherapy            | OTU4460228 |
| 194        | 0.9285878  | SystemicCorticosteroids      | OTU1081372 |
| 192        | 0.9285878  | SystemicCorticosteroids      | OTU912997  |
| 1511       | 0.9285878  | Phototherapy                 | OTU4439089 |
| 442        | 0.9285878  | Cyclosporin                  | OTU4440643 |
| 444        | 0.9285878  | Cyclosporin                  | OTU851917  |
| 886        | 0.9285878  | Dithranol.minute             | OTU279980  |
| 762        | 0.9285878  | Dithranol.minute             | OTU4476950 |
| 1029       | 0.92881133 | Methotrexate                 | OTU4327300 |
| 437        | 0.92881133 | Topicalcalcineurininhibitors | OTU1081372 |
| 438        | 0.92881133 | Topicalcalcineurininhibitors | OTU4482598 |
| 440        | 0.92881133 | Topicalcalcineurininhibitors | OTU912997  |
| 588        | 0.92881133 | Fumaricacid                  | OTU940083  |
| 1944,05,01 | 0.92881133 | Antibiotics                  | OTU4348347 |
| 1944,05,01 | 0.92881133 | Antibiotics                  | OTU511475  |
| 1221       | 0.92881133 | TAR.topical.                 | OTU912997  |
| 1179       | 0.92881133 | Photochemotherapy            | OTU4327300 |
| 1185.5     | 0.92881133 | Photochemotherapy            | OTU837884  |
| 442.5      | 0.92881133 | Cyclosporin                  | OTU4467218 |
| 1126.5     | 0.92938841 | LocalCorticosteroids         | OTU1096610 |
| 347        | 0.92938841 | Topicalcalcineurininhibitors | OTU2110555 |
| 696        | 0.92938841 | Fumaricacid                  | OTU819937  |
| 45         | 0.92938841 | Antibiotics                  | OTU1107940 |
| 45         | 0.92938841 | Antibiotics                  | OTU820692  |
| 540        | 0.92938841 | Cyclosporin                  | OTU4473201 |
| 885        | 0.93132145 | Retinoids                    | OTU4473664 |
| 1052       | 0.93132145 | Methotrexate                 | OTU3841245 |
| 1174       | 0.93132145 | Methotrexate                 | OTU4460228 |
| 1034       | 0.93132145 | Methotrexate                 | OTU610043  |
| 1148.5     | 0.93132145 | LocalCorticosteroids         | OTU511475  |
| 1214       | 0.93132145 | TAR.topical.                 | OTU4440643 |
| 1089       | 0.93132145 | TAR.topical.                 | OTU883806  |
| 1027.5     | 0.93132145 | Photochemotherapy            | OTU403853  |
| 264        | 0.93132145 | SystemicCorticosteroids      | OTU4354809 |
| 199        | 0.93132145 | SystemicCorticosteroids      | OTU940083  |
| 1508       | 0.93132145 | Phototherapy                 | OTU4449324 |
| 1515       | 0.93132145 | Phototherapy                 | OTU4460228 |
| 545        | 0.93132145 | Cyclosporin                  | OTU4047452 |
| 1039       | 0.93135251 | Methotrexate                 | OTU4021335 |
| 1134.5     | 0.93135251 | LocalCorticosteroids         | OTU370309  |
| 696.5      | 0.93135251 | Fumaricacid                  | OTU370309  |
| 1853.5     | 0.93135251 | VitaminDanalogs              | OTU505749  |
| 1067       | 0.93135251 | TAR.topical.                 | OTU2110555 |
| 1031       | 0.93135251 | Photochemotherapy            | OTU4047452 |
| 1035       | 0.93321    | Methotrexate                 | OTU1036883 |
| 1032.5     | 0.93321    | Methotrexate                 | OTU4369229 |

|            |            |                              |            |
|------------|------------|------------------------------|------------|
| 1131       | 0.93321    | LocalCorticosteroids         | OTU496787  |
| 426        | 0.93321    | Topicalcalcineurininhibitors | OTU987144  |
| 593        | 0.93321    | Fumaricacid                  | OTU279980  |
| 1858.5     | 0.93321    | VitaminDanalogs              | OTU285376  |
| 1215       | 0.93321    | TAR.topical.                 | OTU1004369 |
| 1074.5     | 0.93321    | TAR.topical.                 | OTU247720  |
| 771        | 0.93321    | Dithranol.minute             | OTU912906  |
| 1177.5     | 0.93459596 | Methotrexate                 | OTU1096610 |
| 1136       | 0.93586675 | LocalCorticosteroids         | OTU4482598 |
| 430        | 0.93586675 | Topicalcalcineurininhibitors | OTU279980  |
| 433.5      | 0.93586675 | Topicalcalcineurininhibitors | OTU4301457 |
| 1038       | 0.93586675 | Photochemotherapy            | OTU4421536 |
| 202.5      | 0.93586675 | SystemicCorticosteroids      | OTU4468125 |
| 1164       | 0.93621294 | Photochemotherapy            | OTU4299324 |
| 1165       | 0.93842995 | Methotrexate                 | OTU103810  |
| 1844       | 0.93842995 | VitaminDanalogs              | OTU114999  |
| 1006       | 0.94041046 | Retinoids                    | OTU4318084 |
| 687        | 0.94041046 | Fumaricacid                  | OTU654307  |
| 1204.5     | 0.94041046 | TAR.topical.                 | OTU819937  |
| 891.5      | 0.94044152 | Retinoids                    | OTU1003210 |
| 893.5      | 0.94044152 | Retinoids                    | OTU164003  |
| 890        | 0.94044152 | Retinoids                    | OTU4422718 |
| 892        | 0.94044152 | Retinoids                    | OTU4439089 |
| 894        | 0.94044152 | Retinoids                    | OTU851917  |
| 1170       | 0.94044152 | Methotrexate                 | OTU370309  |
| 1166       | 0.94044152 | Methotrexate                 | OTU4421536 |
| 1272.5     | 0.94044152 | LocalCorticosteroids         | OTU4349519 |
| 1155       | 0.94044152 | LocalCorticosteroids         | OTU4481323 |
| 355        | 0.94044152 | Topicalcalcineurininhibitors | OTU20360   |
| 430.5      | 0.94044152 | Topicalcalcineurininhibitors | OTU4047452 |
| 356        | 0.94044152 | Topicalcalcineurininhibitors | OTU4473664 |
| 356        | 0.94044152 | Topicalcalcineurininhibitors | OTU940083  |
| 686.5      | 0.94044152 | Fumaricacid                  | OTU362390  |
| 683        | 0.94044152 | Fumaricacid                  | OTU4299324 |
| 687        | 0.94044152 | Fumaricacid                  | OTU4471315 |
| 1948,05,01 | 0.94044152 | Antibiotics                  | OTU3841245 |
| 1841.5     | 0.94044152 | VitaminDanalogs              | OTU360483  |
| 1828.5     | 0.94044152 | VitaminDanalogs              | OTU4348347 |
| 1845       | 0.94044152 | VitaminDanalogs              | OTU755148  |
| 1688.5     | 0.94044152 | VitaminDanalogs              | OTU761594  |
| 1079       | 0.94044152 | TAR.topical.                 | OTU4471315 |
| 1079.5     | 0.94044152 | TAR.topical.                 | OTU610043  |
| 1085       | 0.94044152 | TAR.topical.                 | OTU654307  |
| 1073.5     | 0.94044152 | TAR.topical.                 | OTU939571  |
| 1164       | 0.94044152 | Photochemotherapy            | OTU1131523 |
| 1043       | 0.94044152 | Photochemotherapy            | OTU939571  |
| 205        | 0.94044152 | SystemicCorticosteroids      | OTU4294554 |
| 205.5      | 0.94044152 | SystemicCorticosteroids      | OTU4411187 |
| 1525.5     | 0.94044152 | Phototherapy                 | OTU370309  |
| 1535       | 0.94044152 | Phototherapy                 | OTU378096  |
| 1537       | 0.94044152 | Phototherapy                 | OTU4348347 |
| 1678       | 0.94044152 | Phototherapy                 | OTU4422405 |
| 1523.5     | 0.94044152 | Phototherapy                 | OTU610043  |
| 1667       | 0.94044152 | Phototherapy                 | OTU940083  |
| 524.5      | 0.94044152 | Cyclosporin                  | OTU3841245 |
| 771        | 0.94044152 | Dithranol.minute             | OTU164003  |
| 778        | 0.94044152 | Dithranol.minute             | OTU4294554 |
| 876        | 0.94044152 | Dithranol.minute             | OTU4318084 |
| 871        | 0.94044152 | Dithranol.minute             | OTU4353642 |
| 772        | 0.94044152 | Dithranol.minute             | OTU4408996 |
| 773        | 0.94044152 | Dithranol.minute             | OTU610043  |
| 685        | 0.94088258 | Fumaricacid                  | OTU74351   |
| 1675       | 0.94088258 | Phototherapy                 | OTU995817  |
| 1151       | 0.94113559 | Methotrexate                 | OTU820692  |
| 49         | 0.94113559 | Antibiotics                  | OTU883806  |
| 1838       | 0.94113559 | VitaminDanalogs              | OTU1003210 |
| 1827       | 0.94113559 | VitaminDanalogs              | OTU4481323 |
| 1080.5     | 0.94113559 | TAR.topical.                 | OTU505749  |
| 1156       | 0.94113559 | Photochemotherapy            | OTU4350124 |
| 201        | 0.94113559 | SystemicCorticosteroids      | OTU285376  |
| 259        | 0.94113559 | SystemicCorticosteroids      | OTU4422405 |
| 453        | 0.94113559 | Cyclosporin                  | OTU4456068 |
| 876        | 0.94113559 | Dithranol.minute             | OTU4047452 |
| 1666.5     | 0.9416623  | Phototherapy                 | OTU370134  |
| 899        | 0.94264371 | Retinoids                    | OTU282360  |
| 1004       | 0.94264371 | Retinoids                    | OTU370309  |
| 1006       | 0.94264371 | Retinoids                    | OTU4422405 |
| 1162.5     | 0.94264371 | Methotrexate                 | OTU4047452 |
| 1162       | 0.94264371 | Methotrexate                 | OTU939571  |
| 1146       | 0.94264371 | LocalCorticosteroids         | OTU912997  |
| 1055       | 0.94264371 | Photochemotherapy            | OTU4353642 |
| 1045       | 0.94264371 | Photochemotherapy            | OTU4467218 |

|        |            |                              |            |
|--------|------------|------------------------------|------------|
| 204.5  | 0.94264371 | SystemicCorticosteroids      | OTU164003  |
| 204    | 0.94264371 | SystemicCorticosteroids      | OTU20360   |
| 207    | 0.94264371 | SystemicCorticosteroids      | OTU912906  |
| 1529   | 0.94264371 | Phototherapy                 | OTU4482598 |
| 455    | 0.94264371 | Cyclosporin                  | OTU4449324 |
| 896.5  | 0.94388727 | Retinoids                    | OTU4467218 |
| 1155   | 0.94388727 | LocalCorticosteroids         | OTU4408996 |
| 45     | 0.94388727 | Antibiotics                  | OTU4349859 |
| 1826   | 0.94388727 | VitaminDanalogs              | OTU912906  |
| 1531.5 | 0.94388727 | Phototherapy                 | OTU4301457 |
| 1532.5 | 0.94388727 | Phototherapy                 | OTU505749  |
| 1660.5 | 0.94390535 | Phototherapy                 | OTU4476950 |
| 783    | 0.94390535 | Dithranol.minute             | OTU378096  |
| 425    | 0.94438696 | Topicalcalcineurininhibitors | OTU4440643 |
| 423    | 0.94438696 | Topicalcalcineurininhibitors | OTU625320  |
| 205.5  | 0.94438696 | SystemicCorticosteroids      | OTU4349519 |
| 1264   | 0.94528897 | LocalCorticosteroids         | OTU360483  |
| 1155   | 0.94528897 | LocalCorticosteroids         | OTU819937  |
| 1268   | 0.94574249 | LocalCorticosteroids         | OTU4449324 |
| 254    | 0.94574249 | SystemicCorticosteroids      | OTU25259   |
| 256    | 0.94574249 | SystemicCorticosteroids      | OTU995817  |
| 423    | 0.94596241 | Topicalcalcineurininhibitors | OTU4421536 |
| 460.5  | 0.9460888  | Cyclosporin                  | OTU370134  |
| 364    | 0.9465208  | Topicalcalcineurininhibitors | OTU14278   |
| 422    | 0.9465208  | Topicalcalcineurininhibitors | OTU4439089 |
| 530    | 0.9465208  | Cyclosporin                  | OTU755148  |
| 1267   | 0.94741399 | LocalCorticosteroids         | OTU403853  |
| 1057   | 0.9479187  | Methotrexate                 | OTU4318084 |
| 604    | 0.9479187  | Fumaricacid                  | OTU851668  |
| 1089   | 0.9479187  | TAR.topical.                 | OTU370134  |
| 204.5  | 0.9479187  | SystemicCorticosteroids      | OTU837884  |
| 1154   | 0.94834179 | Methotrexate                 | OTU1081372 |
| 605    | 0.94834179 | Fumaricacid                  | OTU4439089 |
| 677.5  | 0.94834179 | Fumaricacid                  | OTU4476950 |
| 676    | 0.94834179 | Fumaricacid                  | OTU912906  |
| 1194   | 0.94834179 | TAR.topical.                 | OTU4422405 |
| 1091   | 0.94834179 | TAR.topical.                 | OTU4473664 |
| 1055   | 0.94834179 | Photochemotherapy            | OTU755148  |
| 1156.5 | 0.94834179 | Photochemotherapy            | OTU995817  |
| 1651   | 0.94834179 | Phototherapy                 | OTU13445   |
| 1545   | 0.94834179 | Phototherapy                 | OTU4318084 |
| 1660   | 0.94834179 | Phototherapy                 | OTU4327300 |
| 523    | 0.94834179 | Cyclosporin                  | OTU4348347 |
| 458.5  | 0.94834179 | Cyclosporin                  | OTU496787  |
| 522    | 0.94834179 | Cyclosporin                  | OTU511475  |
| 784.5  | 0.94834179 | Dithranol.minute             | OTU103810  |
| 1700   | 0.94992251 | VitaminDanalogs              | OTU4467218 |
| 1822   | 0.94992251 | VitaminDanalogs              | OTU74351   |
| 1153.5 | 0.94992251 | Photochemotherapy            | OTU4440643 |
| 366.5  | 0.95089257 | Topicalcalcineurininhibitors | OTU4468125 |
| 1710   | 0.95089257 | VitaminDanalogs              | OTU4299324 |
| 1818   | 0.95089257 | VitaminDanalogs              | OTU654307  |
| 1660   | 0.95371818 | Phototherapy                 | OTU1004369 |
| 70     | 0.95691009 | Antibiotics                  | OTU610043  |
| 1711   | 0.95691009 | VitaminDanalogs              | OTU362390  |
| 915.5  | 0.95725431 | Retinoids                    | OTU4348347 |
| 909    | 0.95725431 | Retinoids                    | OTU625320  |
| 607.5  | 0.95725431 | Fumaricacid                  | OTU360483  |
| 1708.5 | 0.95725431 | VitaminDanalogs              | OTU819937  |
| 211    | 0.95725431 | SystemicCorticosteroids      | OTU14278   |
| 251    | 0.95725431 | SystemicCorticosteroids      | OTU4471315 |
| 792    | 0.95725431 | Dithranol.minute             | OTU1107940 |
| 1103   | 0.95854109 | TAR.topical.                 | OTU1107940 |
| 991    | 0.95974721 | Retinoids                    | OTU20360   |
| 907.5  | 0.95974721 | Retinoids                    | OTU403853  |
| 1146   | 0.95974721 | Methotrexate                 | OTU4303697 |
| 1249   | 0.95974721 | LocalCorticosteroids         | OTU362390  |
| 368    | 0.95974721 | Topicalcalcineurininhibitors | OTU654307  |
| 614    | 0.95974721 | Fumaricacid                  | OTU4481323 |
| 70     | 0.95974721 | Antibiotics                  | OTU4449324 |
| 1097   | 0.95974721 | TAR.topical.                 | OTU114999  |
| 1094.5 | 0.95974721 | TAR.topical.                 | OTU4449324 |
| 1063.5 | 0.95974721 | Photochemotherapy            | OTU103810  |
| 1066   | 0.95974721 | Photochemotherapy            | OTU14278   |
| 1061   | 0.95974721 | Photochemotherapy            | OTU164003  |
| 1143   | 0.95974721 | Photochemotherapy            | OTU205025  |
| 1148   | 0.95974721 | Photochemotherapy            | OTU2110555 |
| 1147   | 0.95974721 | Photochemotherapy            | OTU25259   |
| 249    | 0.95974721 | SystemicCorticosteroids      | OTU4303697 |
| 1549   | 0.95974721 | Phototherapy                 | OTU4303697 |
| 1650   | 0.95974721 | Phototherapy                 | OTU4306540 |
| 466.5  | 0.95974721 | Cyclosporin                  | OTU4349519 |

|        |            |                              |            |
|--------|------------|------------------------------|------------|
| 784.5  | 0.95974721 | Dithranol.minute             | OTU4440643 |
| 367    | 0.9601394  | Topicalcalcineurininhibitors | OTU4327286 |
| 1185.5 | 0.9601394  | TAR.topical.                 | OTU403853  |
| 1067   | 0.9609343  | Methotrexate                 | OTU14278   |
| 1146   | 0.9609343  | Methotrexate                 | OTU4474056 |
| 1252   | 0.9609343  | LocalCorticosteroids         | OTU1036883 |
| 1651.5 | 0.9609343  | Phototherapy                 | OTU4456068 |
| 523    | 0.9609343  | Cyclosporin                  | OTU2110555 |
| 524.5  | 0.9609343  | Cyclosporin                  | OTU403853  |
| 521.5  | 0.9609343  | Cyclosporin                  | OTU851668  |
| 787    | 0.9609343  | Dithranol.minute             | OTU4354809 |
| 1147.5 | 0.96113607 | Methotrexate                 | OTU4349859 |
| 1800   | 0.96113607 | VitaminDanalogs              | OTU883806  |
| 1141   | 0.9616637  | Methotrexate                 | OTU114999  |
| 1065.5 | 0.9616637  | Methotrexate                 | OTU4349519 |
| 1066   | 0.9616637  | Methotrexate                 | OTU74351   |
| 1175   | 0.9616637  | LocalCorticosteroids         | OTU13445   |
| 1169   | 0.9616637  | LocalCorticosteroids         | OTU755148  |
| 1252.5 | 0.9616637  | LocalCorticosteroids         | OTU995817  |
| 666    | 0.9616637  | Fumaricacid                  | OTU565753  |
| 675    | 0.9616637  | Fumaricacid                  | OTU837884  |
| 1807.5 | 0.9616637  | VitaminDanalogs              | OTU4350124 |
| 1177.5 | 0.9616637  | TAR.topical.                 | OTU25478   |
| 1102   | 0.9616637  | TAR.topical.                 | OTU4303697 |
| 1648   | 0.9616637  | Phototherapy                 | OTU4354809 |
| 1644   | 0.9616637  | Phototherapy                 | OTU4422718 |
| 1640   | 0.9616637  | Phototherapy                 | OTU4481323 |
| 520    | 0.9616637  | Cyclosporin                  | OTU4303697 |
| 471    | 0.9616637  | Cyclosporin                  | OTU761594  |
| 792    | 0.9616637  | Dithranol.minute             | OTU4303697 |
| 918.5  | 0.96259709 | Retinoids                    | OTU761594  |
| 416    | 0.96259709 | Topicalcalcineurininhibitors | OTU285376  |
| 1066.5 | 0.96259709 | Photochemotherapy            | OTU20360   |
| 244    | 0.96259709 | SystemicCorticosteroids      | OTU820692  |
| 1643   | 0.96259709 | Phototherapy                 | OTU282360  |
| 519.5  | 0.96259709 | Cyclosporin                  | OTU164003  |
| 668.5  | 0.96330929 | Fumaricacid                  | OTU114999  |
| 1069.5 | 0.96330929 | Photochemotherapy            | OTU4476950 |
| 854.5  | 0.96330929 | Dithranol.minute             | OTU1131523 |
| 856.5  | 0.96330929 | Dithranol.minute             | OTU4369229 |
| 68     | 0.96377545 | Antibiotics                  | OTU4369229 |
| 1642   | 0.96377545 | Phototherapy                 | OTU851917  |
| 1641   | 0.96422706 | Phototherapy                 | OTU25259   |
| 1070   | 0.9664714  | Photochemotherapy            | OTU819937  |
| 413    | 0.96714331 | Topicalcalcineurininhibitors | OTU755148  |
| 979    | 0.96726303 | Retinoids                    | OTU4309323 |
| 916    | 0.96726303 | Retinoids                    | OTU912997  |
| 618    | 0.96726303 | Fumaricacid                  | OTU103810  |
| 68     | 0.96726303 | Antibiotics                  | OTU285376  |
| 243    | 0.96726303 | SystemicCorticosteroids      | OTU1107940 |
| 1557   | 0.96726303 | Phototherapy                 | OTU939571  |
| 980    | 0.96861598 | Retinoids                    | OTU360483  |
| 928    | 0.96861598 | Retinoids                    | OTU3841245 |
| 981    | 0.96861598 | Retinoids                    | OTU4354809 |
| 1072   | 0.96861598 | Methotrexate                 | OTU4446521 |
| 1132   | 0.96861598 | Methotrexate                 | OTU4481323 |
| 410    | 0.96861598 | Topicalcalcineurininhibitors | OTU362390  |
| 618    | 0.96861598 | Fumaricacid                  | OTU4473664 |
| 662    | 0.96861598 | Fumaricacid                  | OTU820692  |
| 1804   | 0.96861598 | VitaminDanalogs              | OTU4471315 |
| 1107   | 0.96861598 | TAR.topical.                 | OTU755148  |
| 241    | 0.96861598 | SystemicCorticosteroids      | OTU883806  |
| 516    | 0.96861598 | Cyclosporin                  | OTU4421536 |
| 516    | 0.96861598 | Cyclosporin                  | OTU625320  |
| 516    | 0.96861598 | Cyclosporin                  | OTU819937  |
| 796    | 0.96861598 | Dithranol.minute             | OTU2110555 |
| 797    | 0.96861598 | Dithranol.minute             | OTU25259   |
| 1171   | 0.97052901 | TAR.topical.                 | OTU282360  |
| 979    | 0.97056003 | Retinoids                    | OTU1004369 |
| 923    | 0.97056003 | Retinoids                    | OTU2110555 |
| 925    | 0.97056003 | Retinoids                    | OTU247720  |
| 976    | 0.97056003 | Retinoids                    | OTU4021335 |
| 977    | 0.97056003 | Retinoids                    | OTU4471315 |
| 930    | 0.97056003 | Retinoids                    | OTU883806  |
| 1074   | 0.97056003 | Methotrexate                 | OTU370134  |
| 1183   | 0.97056003 | LocalCorticosteroids         | OTU565753  |
| 664    | 0.97056003 | Fumaricacid                  | OTU4303697 |
| 1802   | 0.97056003 | VitaminDanalogs              | OTU2110555 |
| 1133.5 | 0.97056003 | Photochemotherapy            | OTU370309  |
| 1074   | 0.97056003 | Photochemotherapy            | OTU4482598 |
| 243    | 0.97056003 | SystemicCorticosteroids      | OTU1131523 |
| 243    | 0.97056003 | SystemicCorticosteroids      | OTU282360  |



|        |            |                              |            |
|--------|------------|------------------------------|------------|
| 218    | 0.97056003 | SystemicCorticosteroids      | OTU3208510 |
| 1632   | 0.97056003 | Phototherapy                 | OTU114999  |
| 1634   | 0.97056003 | Phototherapy                 | OTU279980  |
| 1563   | 0.97056003 | Phototherapy                 | OTU755148  |
| 515    | 0.97056003 | Cyclosporin                  | OTU4439089 |
| 845    | 0.97056003 | Dithranol.minute             | OTU851925  |
| 927    | 0.97123767 | Retinoids                    | OTU3208510 |
| 924.5  | 0.97123767 | Retinoids                    | OTU4306540 |
| 1180   | 0.97123767 | LocalCorticosteroids         | OTU2901965 |
| 1184   | 0.97123767 | LocalCorticosteroids         | OTU378096  |
| 623.5  | 0.97123767 | Fumaricacid                  | OTU4350124 |
| 619    | 0.97123767 | Fumaricacid                  | OTU912997  |
| 1736   | 0.97123767 | VitaminDanalogs              | OTU565753  |
| 1623   | 0.97123767 | Phototherapy                 | OTU3841245 |
| 1635   | 0.97123767 | Phototherapy                 | OTU496787  |
| 846.5  | 0.97123767 | Dithranol.minute             | OTU819937  |
| 798.5  | 0.97123767 | Dithranol.minute             | OTU837884  |
| 1130   | 0.97270009 | Photochemotherapy            | OTU4446521 |
| 1129.5 | 0.97339847 | Photochemotherapy            | OTU282360  |
| 242    | 0.97339847 | SystemicCorticosteroids      | OTU4473664 |
| 217.5  | 0.97405353 | SystemicCorticosteroids      | OTU4369229 |
| 1233   | 0.97418992 | LocalCorticosteroids         | OTU14278   |
| 622    | 0.97418992 | Fumaricacid                  | OTU4327300 |
| 1081   | 0.97433502 | Photochemotherapy            | OTU362390  |
| 1127   | 0.97825737 | Photochemotherapy            | OTU247720  |
| 1082   | 0.97844062 | Photochemotherapy            | OTU3208510 |
| 378.5  | 0.97854183 | Topicalcalcineurininhibitors | OTU103810  |
| 1166.5 | 0.97854183 | TAR.topical.                 | OTU496787  |
| 1235   | 0.97964384 | LocalCorticosteroids         | OTU4354809 |
| 626.5  | 0.97964384 | Fumaricacid                  | OTU13445   |
| 1118   | 0.97964384 | TAR.topical.                 | OTU761594  |
| 479    | 0.97964384 | Cyclosporin                  | OTU4317476 |
| 929    | 0.97977109 | Retinoids                    | OTU4303697 |
| 1738.5 | 0.97977109 | VitaminDanalogs              | OTU378096  |
| 1788   | 0.97999566 | VitaminDanalogs              | OTU987144  |
| 927.5  | 0.98135141 | Retinoids                    | OTU4346894 |
| 403    | 0.98135141 | Topicalcalcineurininhibitors | OTU851925  |
| 479.5  | 0.98135141 | Cyclosporin                  | OTU2901965 |
| 221    | 0.98248499 | SystemicCorticosteroids      | OTU4481323 |
| 1083   | 0.98365272 | Methotrexate                 | OTU25259   |
| 1119   | 0.98365272 | Methotrexate                 | OTU883806  |
| 1083.5 | 0.98365272 | Photochemotherapy            | OTU4349522 |
| 1126   | 0.98365272 | Photochemotherapy            | OTU4474056 |
| 1621.5 | 0.98365272 | Phototherapy                 | OTU4468125 |
| 509    | 0.98365272 | Cyclosporin                  | OTU4460228 |
| 1124   | 0.98378876 | Methotrexate                 | OTU4440643 |
| 1122   | 0.98378876 | Methotrexate                 | OTU4473201 |
| 1120.5 | 0.98378876 | Methotrexate                 | OTU511475  |
| 657    | 0.98378876 | Fumaricacid                  | OTU4317476 |
| 1741   | 0.98378876 | VitaminDanalogs              | OTU4021335 |
| 1119   | 0.98378876 | TAR.topical.                 | OTU4467218 |
| 1084   | 0.98378876 | Photochemotherapy            | OTU625320  |
| 1623.5 | 0.98378876 | Phototherapy                 | OTU4467218 |
| 1619   | 0.98378876 | Phototherapy                 | OTU565753  |
| 1576   | 0.98378876 | Phototherapy                 | OTU851668  |
| 508    | 0.98378876 | Cyclosporin                  | OTU4471315 |
| 841    | 0.98378876 | Dithranol.minute             | OTU1036883 |
| 509    | 0.98448982 | Cyclosporin                  | OTU837884  |
| 934.5  | 0.98530666 | Retinoids                    | OTU103810  |
| 966    | 0.98530666 | Retinoids                    | OTU4446521 |
| 932.5  | 0.98530666 | Retinoids                    | OTU496787  |
| 656    | 0.98530666 | Fumaricacid                  | OTU2110555 |
| 653    | 0.98530666 | Fumaricacid                  | OTU851925  |
| 1785.5 | 0.98530666 | VitaminDanalogs              | OTU4476950 |
| 1158   | 0.98530666 | TAR.topical.                 | OTU360483  |
| 1579   | 0.98530666 | Phototherapy                 | OTU4473201 |
| 1618   | 0.98530666 | Phototherapy                 | OTU912906  |
| 508    | 0.98530666 | Cyclosporin                  | OTU4354809 |
| 485    | 0.98530666 | Cyclosporin                  | OTU820692  |
| 965    | 0.987455   | Retinoids                    | OTU114999  |
| 1121   | 0.987455   | Photochemotherapy            | OTU1036883 |
| 1619.5 | 0.9874968  | Phototherapy                 | OTU4440643 |
| 937.5  | 0.98835338 | Retinoids                    | OTU511475  |
| 1125.5 | 0.98835338 | TAR.topical.                 | OTU378096  |
| 631    | 0.98847033 | Fumaricacid                  | OTU3208510 |
| 1117   | 0.98847033 | Photochemotherapy            | OTU820692  |
| 810    | 0.98847033 | Dithranol.minute             | OTU2901965 |
| 937    | 0.98891134 | Retinoids                    | OTU74351   |
| 1194   | 0.98891134 | LocalCorticosteroids         | OTU4318084 |
| 630    | 0.98891134 | Fumaricacid                  | OTU4474056 |
| 63     | 0.98891134 | Antibiotics                  | OTU20360   |
| 63     | 0.98891134 | Antibiotics                  | OTU4301457 |

|        |            |                              |            |
|--------|------------|------------------------------|------------|
| 1153   | 0.98891134 | TAR.topical.                 | OTU4294554 |
| 1118   | 0.98891134 | Photochemotherapy            | OTU4021335 |
| 1088   | 0.98891134 | Photochemotherapy            | OTU4422405 |
| 653    | 0.98987863 | Fumaricacid                  | OTU2901965 |
| 652    | 0.98987863 | Fumaricacid                  | OTU4309323 |
| 1126   | 0.98987863 | TAR.topical.                 | OTU851668  |
| 812    | 0.99051617 | Dithranol.minute             | OTU1003210 |
| 1116   | 0.99067792 | Methotrexate                 | OTU4299324 |
| 1195   | 0.99067792 | LocalCorticosteroids         | OTU4471315 |
| 385    | 0.99067792 | Topicalcalcineurininhibitors | OTU4481323 |
| 1613   | 0.99067792 | Phototherapy                 | OTU14278   |
| 1583   | 0.99067792 | Phototherapy                 | OTU4474056 |
| 811.5  | 0.99067792 | Dithranol.minute             | OTU4449324 |
| 651    | 0.99146669 | Fumaricacid                  | OTU4473201 |
| 503.5  | 0.99146669 | Cyclosporin                  | OTU610043  |
| 1152   | 0.99172584 | TAR.topical.                 | OTU940083  |
| 812.5  | 0.99172584 | Dithranol.minute             | OTU496787  |
| 939    | 0.99373266 | Retinoids                    | OTU4317476 |
| 1779   | 0.99373266 | VitaminDanalogs              | OTU939571  |
| 1116   | 0.99465828 | Methotrexate                 | OTU4422405 |
| 1115   | 0.99465828 | Methotrexate                 | OTU505749  |
| 502    | 0.99465828 | Cyclosporin                  | OTU3208510 |
| 815.5  | 0.99465828 | Dithranol.minute             | OTU4411187 |
| 815    | 0.99465828 | Dithranol.minute             | OTU761594  |
| 1752   | 0.9949947  | VitaminDanalogs              | OTU3208510 |
| 1114   | 0.99621042 | Methotrexate                 | OTU4467218 |
| 1201   | 0.99621042 | LocalCorticosteroids         | OTU1107940 |
| 1149   | 0.99621042 | TAR.topical.                 | OTU4439089 |
| 1112.5 | 0.99621042 | Photochemotherapy            | OTU4318084 |
| 234    | 0.99621042 | SystemicCorticosteroids      | OTU851925  |
| 1610   | 0.99621042 | Phototherapy                 | OTU164003  |
| 1611   | 0.99621042 | Phototherapy                 | OTU285376  |
| 1609   | 0.99621042 | Phototherapy                 | OTU3208510 |
| 501.5  | 0.99621042 | Cyclosporin                  | OTU20360   |
| 1610   | 0.99797008 | Phototherapy                 | OTU403853  |
| 1590.5 | 0.99797008 | Phototherapy                 | OTU511475  |
| 1095   | 0.99800556 | Methotrexate                 | OTU4449324 |
| 949.5  | 1          | Retinoids                    | OTU285376  |
| 1110   | 1          | Methotrexate                 | OTU4349522 |
| 1111   | 1          | Methotrexate                 | OTU4482598 |
| 1110   | 1          | Methotrexate                 | OTU940083  |
| 1211.5 | 1          | LocalCorticosteroids         | OTU370134  |
| 1208   | 1          | LocalCorticosteroids         | OTU4446521 |
| 1209   | 1          | LocalCorticosteroids         | OTU912906  |
| 389.5  | 1          | Topicalcalcineurininhibitors | OTU13445   |
| 390    | 1          | Topicalcalcineurininhibitors | OTU4353642 |
| 393    | 1          | Topicalcalcineurininhibitors | OTU4446521 |
| 391    | 1          | Topicalcalcineurininhibitors | OTU4460228 |
| 393    | 1          | Topicalcalcineurininhibitors | OTU505749  |
| 388    | 1          | Topicalcalcineurininhibitors | OTU837884  |
| 395.5  | 1          | Topicalcalcineurininhibitors | OTU939571  |
| 638    | 1          | Fumaricacid                  | OTU1004369 |
| 639    | 1          | Fumaricacid                  | OTU4408996 |
| 638    | 1          | Fumaricacid                  | OTU4482598 |
| 642    | 1          | Fumaricacid                  | OTU939571  |
| 1760.5 | 1          | VitaminDanalogs              | OTU20360   |
| 1766   | 1          | VitaminDanalogs              | OTU247720  |
| 1762.5 | 1          | VitaminDanalogs              | OTU2901965 |
| 1761   | 1          | VitaminDanalogs              | OTU370309  |
| 1770   | 1          | VitaminDanalogs              | OTU4327300 |
| 1769   | 1          | VitaminDanalogs              | OTU4421536 |
| 1755   | 1          | VitaminDanalogs              | OTU4449324 |
| 1146   | 1          | TAR.topical.                 | OTU14278   |
| 1145   | 1          | TAR.topical.                 | OTU4317476 |
| 1135   | 1          | TAR.topical.                 | OTU4460228 |
| 1138   | 1          | TAR.topical.                 | OTU4474056 |
| 1139   | 1          | TAR.topical.                 | OTU511475  |
| 1098   | 1          | Photochemotherapy            | OTU1107940 |
| 1103.5 | 1          | Photochemotherapy            | OTU13445   |
| 1105   | 1          | Photochemotherapy            | OTU2901965 |
| 1107   | 1          | Photochemotherapy            | OTU4294554 |
| 1108   | 1          | Photochemotherapy            | OTU4473201 |
| 1100   | 1          | Photochemotherapy            | OTU505749  |
| 1100   | 1          | Photochemotherapy            | OTU511475  |
| 1099   | 1          | Photochemotherapy            | OTU851925  |
| 230    | 1          | SystemicCorticosteroids      | OTU4327300 |
| 233.5  | 1          | SystemicCorticosteroids      | OTU4350124 |
| 229    | 1          | SystemicCorticosteroids      | OTU4353642 |
| 229.5  | 1          | SystemicCorticosteroids      | OTU511475  |
| 227    | 1          | SystemicCorticosteroids      | OTU565753  |
| 230    | 1          | SystemicCorticosteroids      | OTU819937  |
| 1596   | 1          | Phototherapy                 | OTU360483  |

|       |   |                  |            |
|-------|---|------------------|------------|
| 1592  | 1 | Phototherapy     | OTU4021335 |
| 1602  | 1 | Phototherapy     | OTU4350124 |
| 494.5 | 1 | Cyclosporin      | OTU285376  |
| 499   | 1 | Cyclosporin      | OTU360483  |
| 498   | 1 | Cyclosporin      | OTU4021335 |
| 498   | 1 | Cyclosporin      | OTU4369229 |
| 494   | 1 | Cyclosporin      | OTU4411187 |
| 495   | 1 | Cyclosporin      | OTU4468125 |
| 818.5 | 1 | Dithranol.minute | OTU114999  |
| 823   | 1 | Dithranol.minute | OTU4348347 |

## REVIEWERS' COMMENTS:

Reviewer #1 (Remarks to the Author):

We feel the authors have sufficiently addressed my concerns for the manuscript. Congratulations on a great paper.

Reviewer #2 (Remarks to the Author):

I am satisfied with what the authors have done to address the comments.

Reviewer #3 (Remarks to the Author):

The manuscript has improved; the sections in the results and discussion regarding interpretation of the *S. aureus* and host transcriptional signatures is now much better explained.

For Figure S8b, I could not find the methods about how you picked the genes shown in Figure S8b. For example, under "Two\_Component\_System", only 15 genes have abundance data shown. Were these ones picked because they showed the best differences across the SA high vs low categories? Or were these the ones that had the best WGS coverage? I'm sorry if the methods are clearly stated somewhere, but I couldn't find it easily.

Responses to the reviewers' comments:

**Reviewer #3 (remarks to the author):**

*For Figure S8b, I could not find the methods about how you picked the genes shown in Figure S8b. For example, under "Two\_Component\_System", only 15 genes have abundance data shown. Were these ones picked because they showed the best differences across the SA high vs low categories? Or were these the ones that had the best WGS coverage? I'm sorry if the methods are clearly stated somewhere, but I couldn't find it easily.*

**Answer:**

Indeed, the heatmap presented in Figure S8b shows the top most significantly differentially abundant set of microbial genes between the *S. aureus*-high and *S. aureus*-low, with a cutoff of log<sub>2</sub> fold-change > 1 and adjusted p-value < 0.05, annotated with the relevant KEGG pathway categories. The statistical test used was the zero-inflated Gaussian model implemented in the metagenomeSeq R package with adjustment for sampling site, body site, age, sex and library preparation. The figure legend has been updated accordingly (Supplementary Fig. 8b).
